# Supplementary material for: Determination of the Minimum Sample Amount for Capillary Electrophoresis-Fourier Transform Mass Spectrometry (CE-FTMS)-Based Metabolomics of Colorectal Cancer Biopsies
Source: MDPI journal article supplement (doi:10.3390/biomedicines11061706), 2023-06-13

**Figure S3: Pyrimidine metabolism.** Blue and red bars represent nontumor and tumor sites, respectively. It was suggested that RNA synthesis and purine metabolism were enhanced in tumor sites compared to nontumor sites.

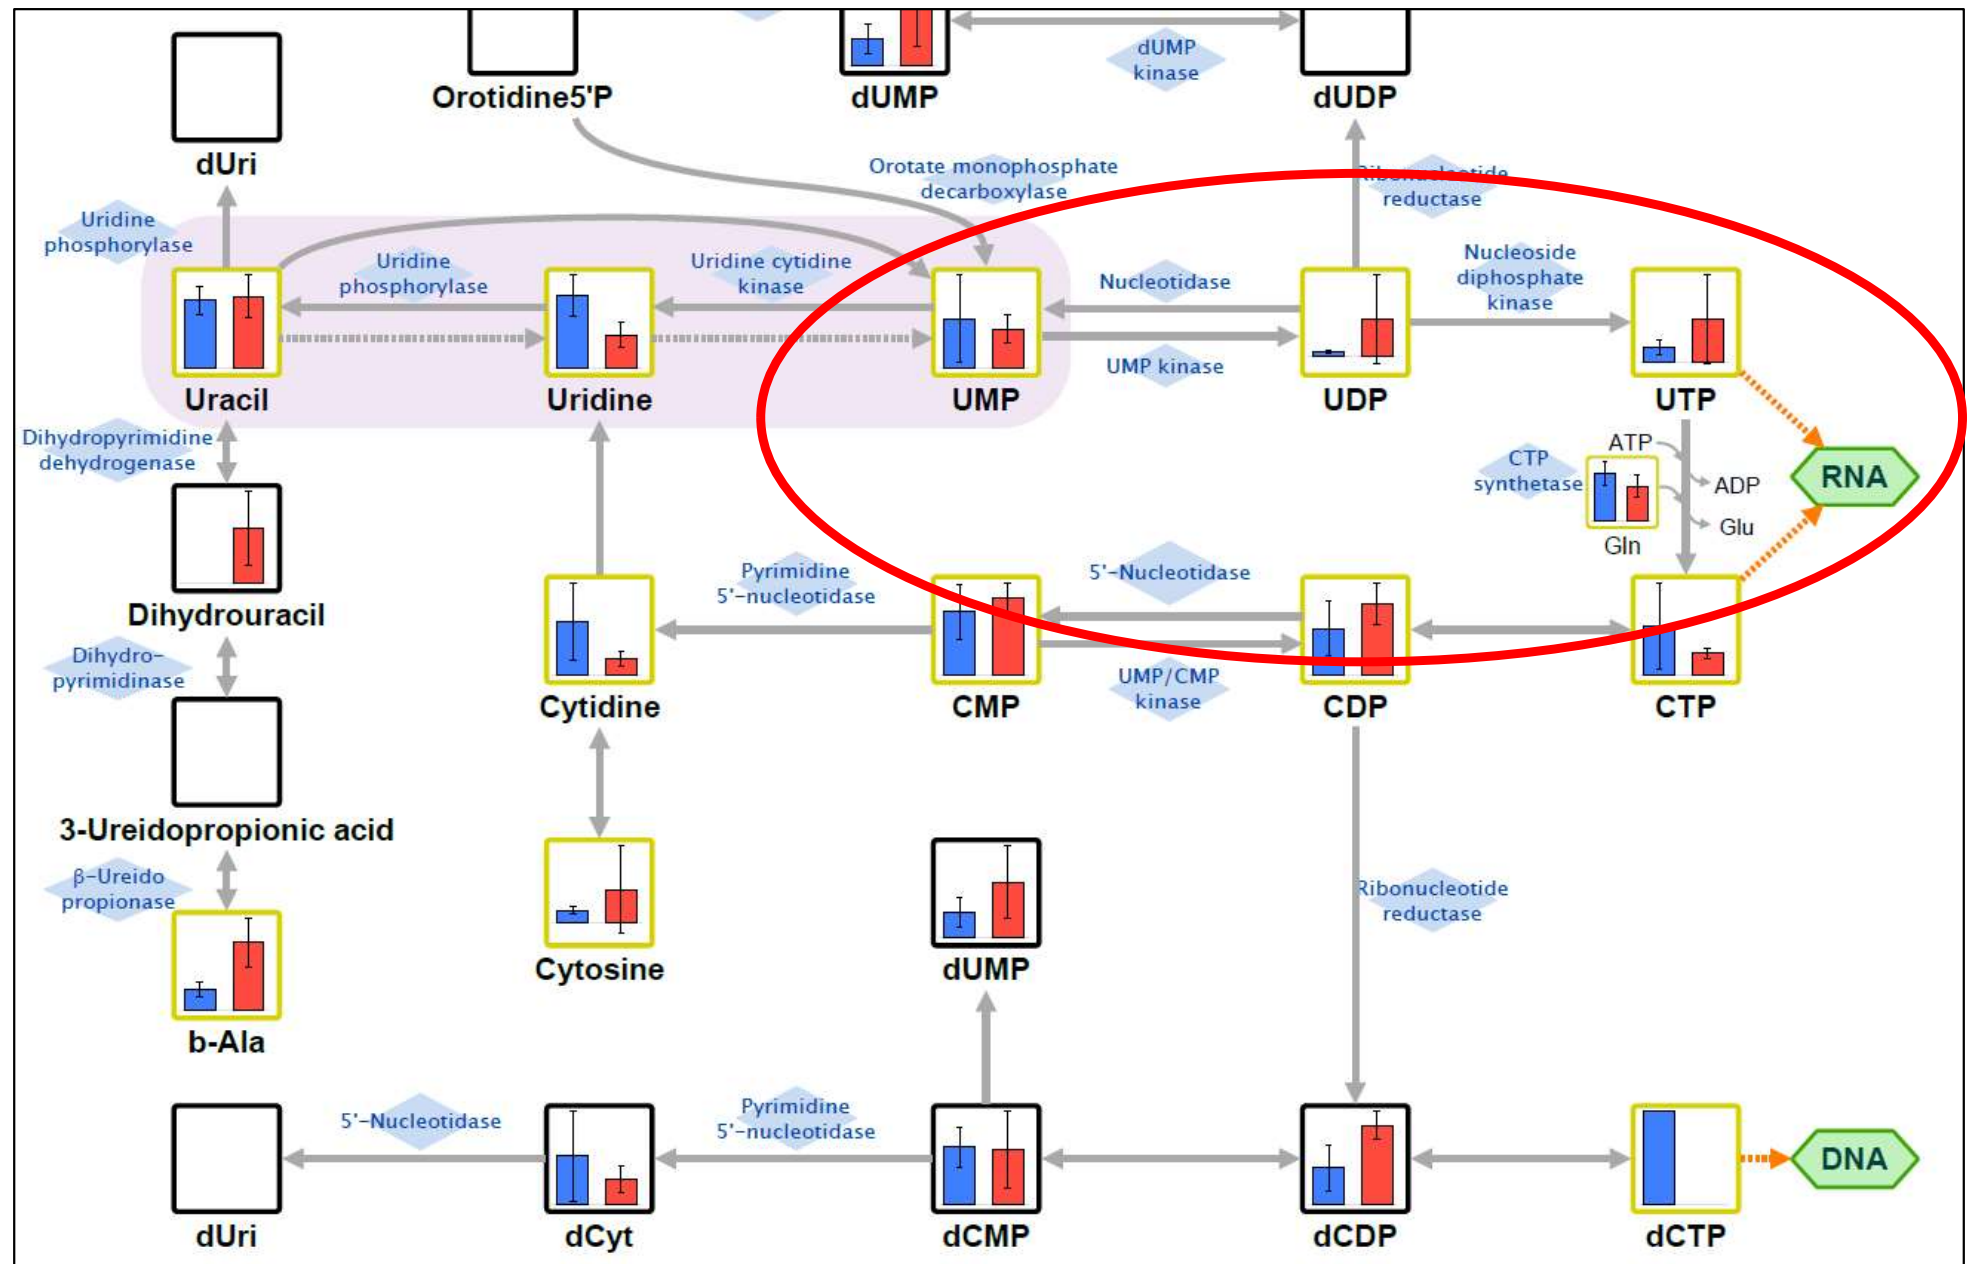

Supplement: s1 [file s1]
