# Supplementary material for: Determination of the Minimum Sample Amount for Capillary Electrophoresis-Fourier Transform Mass Spectrometry (CE-FTMS)-Based Metabolomics of Colorectal Cancer Biopsies
Source: Biomedicines. 2023 Jun 13;11(6):1706. doi: 10.3390/biomedicines11061706 (PMC10296550; doi:10.3390/biomedicines11061706)
Supplement: Supplementary file 1 [file biomedicines-11-01706-s001.zip]

Archive with 5 entries (5 files):
- Supplementary Materials/Figure S1.pdf
- Supplementary Materials/Figure S2.pdf
- Supplementary Materials/Figure S3.pdf
- Supplementary Materials/Figure S4.pdf
- Supplementary Materials/Table S1.xlsx
