# Supplementary material for: Determination of the Minimum Sample Amount for Capillary Electrophoresis-Fourier Transform Mass Spectrometry (CE-FTMS)-Based Metabolomics of Colorectal Cancer Biopsies
Source: Biomedicines. 2023 Jun 13;11(6):1706. doi: 10.3390/biomedicines11061706 (PMC10296550; doi:10.3390/biomedicines11061706)
Supplement: Supplementary file 1 [file biomedicines-11-01706-s001.zip › Supplementary Materials/Table S1.xlsx]

## Sheet: Data
Table S1: Annotated Metabolites
HMT DB				m/z	Relative Area
Compound name	Pathway Label	PubChem CID	HMDB ID		Nontumor-1				Nontumor-2				Nontumor-3				Nontumor-4				Nontumor-5				Tumor-1				Tumor-2				Tumor-3				Tumor-4				Tumor-5
					A1-N1	A1-N2	A1-N3	A1-N4	A2-N1	A2-N2	A2-N3	A2-N4	A3-N1	A3-N2	A3-N3	A3-N4	A4-N1	A4-N2	A4-N3	A4-N4	A5-N1	A5-N2	A5-N3	A5-N4	A1-T1	A1-T2	A1-T3	A1-T4	A2-T1	A2-T2	A2-T3	A2-T4	A3-T1	A3-T2	A3-T3	A3-T4	A4-T1	A4-T2	A4-T3	A4-T4	A5-T1	A5-T2	A5-T3	A5-T4
1,3-Diaminopropane	DAP	428	HMDB0000002	75.0917	N.D.	N.D.	N.D.	N.D.	1.07231e-05	7.05449e-06	1.0769e-05	N.D.	N.D.	6.5838e-06	5.3392e-06	N.D.	N.D.	N.D.	N.D.	N.D.	N.D.	N.D.	N.D.	N.D.	N.D.	7.7371e-06	N.D.	N.D.	N.D.	N.D.	N.D.	N.D.	N.D.	N.D.	N.D.	N.D.	5.66085e-06	N.D.	N.D.	N.D.	N.D.	N.D.	N.D.	N.D.
1-Aminocyclopropane-1-carboxylic acid Homoserinelactone	1-Aminocyclopropane-1-carboxylic acid Homoserinelactone	535 73509		102.055	0.0021076	0.000583663	0.00115056	0.000630873	0.00153935	0.00144068	0.000743622	0.000954433	N.D.	0.000387613	0.000319017	0.000510147	0.00135235	0.000592712	0.000726586	0.000718764	0.00128942	0.00125139	0.00128486	0.00114543	0.00180926	0.00190815	0.00259575	0.00293978	0.00348196	0.00498927	0.00270468	0.00334422	0.00356788	0.00414017	0.00216103	0.00277963	0.00286894	0.00270002	0.00362639	0.00333458	0.00259048	0.00218741	0.00249957	0.00191144
1-Methyl-2-pyrrolidone	1-Methyl-2-pyrrolidone	13387		100.076	0.0169705	N.D.	N.D.	N.D.	N.D.	N.D.	N.D.	N.D.	N.D.	N.D.	N.D.	N.D.	0.00701611	N.D.	N.D.	N.D.	N.D.	N.D.	N.D.	N.D.	N.D.	0.00292473	N.D.	N.D.	0.00934559	N.D.	0.00317281	N.D.	N.D.	N.D.	N.D.	N.D.	N.D.	N.D.	N.D.	N.D.	N.D.	N.D.	N.D.	N.D.
1-Methyl-4-imidazoleacetic acid	MIA	75810	HMDB0002820	141.066	0.0124071	0.00419841	0.00592336	0.00558127	0.00240178	0.00211322	0.00166922	0.00241671	0.00294291	0.00184366	0.0025424	0.00215407	0.00144024	0.000884076	0.000973497	0.000721089	0.00127751	0.00114244	0.00144461	0.00173738	0.0017328	0.00190547	0.00172794	0.0015542	0.00124949	0.000610455	0.000901684	0.000700283	0.00097113	0.000717613	0.00107233	0.000976123	0.000414316	0.000627921	0.000622551	0.000460752	0.000660647	0.00103552	0.000800619	0.000867768
1-Methyladenosine	1-Methyladenosine	27476	HMDB0003331	282.12	0.00249661	0.000861138	0.00139151	0.00114844	0.00143992	0.00186339	0.00148063	0.00142019	0.00345196	0.002117	0.0022709	0.00200136	0.00172235	0.00119941	0.00136515	0.00115188	0.00172325	0.00184806	0.00160267	0.00168963	0.00481029	0.00419278	0.00416921	0.00475015	0.00601684	0.00414182	0.00308333	0.00294126	0.00598004	0.00413065	0.0038744	0.0054692	0.00200974	0.0023196	0.0032455	0.00271857	0.0020496	0.00182029	0.00190401	0.00193816
1-Methylhistamine	1-Methylhistamine	3614	HMDB0000898	126.103	0.0306784	0.0109822	0.0188763	0.0127763	0.021069	0.0230294	0.0138442	0.019115	0.00815313	0.00951289	0.0112317	0.0109135	0.005862	0.00584677	0.00447105	0.00526437	0.010405	0.0114637	0.0095538	0.0110112	0.0125195	0.0147444	0.0133779	0.0101219	0.00720502	0.00452977	0.00782464	0.00731365	0.00609547	0.0126216	0.00619707	0.0086981	0.00457782	0.00610294	0.00488521	0.00311576	0.00763263	0.00501912	0.00707926	0.00441668
1-Methylhydantoin Glycine anhydride	1-Methylhydantoin Glycine anhydride	69217 7817	HMDB0003646	115.05	0.028476	0.00894976	0.0136268	0.011962	0.0188063	0.0156525	0.0123742	0.0137481	0.0177182	0.0130978	0.00996608	0.0116058	0.00584873	0.00312966	0.00400812	0.00294403	0.0135907	0.0118068	0.0117878	0.00921765	0.00782191	0.00950668	0.0116945	0.00653428	0.0234959	0.0173881	0.0168811	0.0157474	0.0124831	0.0111373	0.0105568	0.0152969	0.00466515	0.00646353	0.00441062	0.00481259	0.0122207	0.0179472	0.0135806	0.0123878
1-Methylnicotinamide	1-Methylnicotinamide	457	HMDB0000699	137.071	0.0134057	0.0053247	0.00867227	0.00669687	0.00781664	0.00729764	0.00407837	0.00641182	0.00967299	0.00827161	0.00742109	0.00868975	0.00318137	0.00281454	0.00293005	0.00245029	0.00569452	0.0068079	0.00575398	0.00553988	0.028193	0.0201681	0.0210214	0.019784	0.0485723	0.0267376	0.0249422	0.0200351	0.0352193	0.0216915	0.0158498	0.023849	0.00961607	0.00991065	0.0130637	0.0117792	0.0166121	0.0176475	0.0137615	0.0138991
1-Methyluric acid	1-Methyluric acid	69726	HMDB0003099	181.036	2.54648e-05	1.16188e-05	1.0337e-05	1.2721e-05	6.07636e-05	7.67705e-05	0.000272533	8.62577e-05	N.D.	3.20224e-05	3.13709e-05	2.96979e-05	0.000177687	7.98671e-05	0.000101333	0.000105453	6.24232e-06	1.07936e-05	9.65409e-06	5.66168e-06	N.D.	1.00915e-05	6.10549e-06	4.51346e-06	0.000321598	0.00016474	0.000153687	0.000149111	1.6146e-05	2.17797e-05	2.754e-05	2.82688e-05	0.000146312	0.000125417	0.000274186	0.000235207	1.01428e-05	8.66788e-06	6.02092e-06	1.02877e-05
11-Aminoundecanoic acid	11-Aminoundecanoic acid	17083		202.18	0.00855196	0.00104892	0.000471542	0.000531637	0.00222005	0.000892012	0.000891262	0.000600371	0.00392398	0.00110362	0.00050662	0.000579305	0.00404495	0.00067791	0.000785788	0.000572168	0.00213614	0.00133337	0.000719722	0.000593139	0.000399907	0.00102901	0.000568338	0.000368001	0.00226968	0.00254151	0.00106675	0.000847164	0.000870896	0.000582327	0.00175969	0.000635556	0.00073682	0.000924289	0.000712	0.000360021	0.000636112	0.000552543	0.000512915	0.000310033
15-Methyl prostaglandin F2α	15-Methyl prostaglandin F2a	6441042		367.249	N.D.	N.D.	N.D.	N.D.	N.D.	N.D.	N.D.	N.D.	N.D.	N.D.	N.D.	N.D.	N.D.	N.D.	N.D.	N.D.	N.D.	N.D.	N.D.	N.D.	N.D.	N.D.	N.D.	N.D.	N.D.	N.D.	2.18586e-05	N.D.	N.D.	N.D.	N.D.	N.D.	N.D.	N.D.	N.D.	N.D.	N.D.	N.D.	N.D.	N.D.
1H-Imidazole-4-propionic acid	1H-Imidazole-4-propionic acid	10105257		141.066	0.00189773	0.000495199	0.000992659	0.000805627	0.00126733	0.000642465	0.00284748	0.00196059	N.D.	2.30856e-05	N.D.	N.D.	0.00751734	0.00159812	0.00381569	0.00227817	0.000128013	9.88752e-05	0.000284089	0.000179137	0.00281626	0.00205718	0.00235892	0.00384346	0.017224	0.0051362	0.0108419	0.00789612	2.11492e-05	3.20063e-05	N.D.	2.11113e-05	0.00860729	0.00743236	0.0187208	0.0152316	7.72224e-05	0.000132134	0.000105223	7.85805e-05
2'-Deoxyadenosine 5'-Deoxyadenosine	dAdenosine 5'-Deoxyadenosine	13730 439182	HMDB0000101 HMDB0001983	252.109	2.86025e-05	9.82825e-06	5.53478e-05	3.11188e-05	2.8209e-05	2.3994e-05	4.10355e-05	3.07025e-05	N.D.	2.27541e-05	7.77061e-05	3.78425e-05	2.52803e-05	4.85614e-06	1.97518e-05	N.D.	N.D.	1.16422e-05	N.D.	N.D.	6.25138e-05	2.15565e-05	2.43864e-05	0.000132955	N.D.	N.D.	2.38112e-05	2.39801e-05	2.33353e-05	7.89472e-05	N.D.	3.24524e-05	4.8103e-05	2.93147e-05	2.37461e-05	5.78589e-05	3.28042e-05	2.31906e-05	3.14738e-05	7.24805e-05
2'-Deoxycytidine	dCyt	13711	HMDB0000014	228.098	7.62735e-05	7.58617e-06	5.25583e-05	2.11339e-05	9.19791e-05	5.55323e-05	9.21322e-05	6.88375e-05	0.000162272	8.5973e-05	0.000135039	0.000117904	3.16471e-05	1.0693e-05	1.39674e-05	1.71052e-05	1.71685e-05	2.13488e-05	1.38695e-05	N.D.	1.37237e-05	1.24299e-05	1.31236e-05	4.283e-05	N.D.	N.D.	1.54773e-05	N.D.	2.71112e-05	3.37492e-05	1.37869e-05	3.71545e-05	1.77879e-05	1.80113e-05	4.02934e-05	6.4749e-05	1.30168e-05	1.14032e-05	1.40187e-05	5.09613e-05
2'-Deoxyguanosine	dGuanosine	187790	HMDB0000085	268.104	0.000139606	6.6075e-05	0.00010682	9.31792e-05	9.65806e-05	8.30318e-05	9.82657e-05	0.000133526	0.000397608	0.000234145	0.000245528	0.000264312	7.15394e-05	7.54748e-05	7.50772e-05	4.59086e-05	9.02654e-05	9.44641e-05	7.60843e-05	7.08222e-05	0.000172803	0.000143664	0.000138867	0.000190638	0.000271969	0.000141507	0.00016842	0.000187524	0.000250455	0.000166412	0.000259548	0.000151744	0.000121694	9.40342e-05	0.000122898	0.000167455	0.000122933	8.26733e-05	9.17453e-05	0.000119387
2'-Deoxyinosine	2'-Deoxyinosine	135398593	HMDB0000071	253.093	0.000135626	0.000119844	0.000123408	0.00016903	0.00016336	0.000128309	0.000143477	0.000150313	0.000281635	0.000225942	0.000223021	0.000179185	7.64148e-05	7.83329e-05	9.88063e-05	8.44725e-05	0.000125635	0.000145415	0.00012656	0.000155505	0.00018089	0.000179254	0.000100328	0.000122063	0.000260314	0.000318345	0.000240262	0.000274235	0.000279124	0.000371278	0.000441441	0.000258348	0.000222028	0.000185558	0.000232406	0.000267759	0.000212648	0.000128596	0.000184324	0.000271289
2,3-Diphosphoglyceric acid	Diphosphoglycerate	186004	HMDB0001294	264.952	0.0269391	0.00900687	0.00565534	0.00720669	0.00656814	0.0111745	0.0189618	0.00845176	0.0121348	0.0199086	0.0164978	0.0182309	0.00642457	0.00835973	0.00596032	0.0060599	0.00825582	0.0162392	0.0163466	0.0122616	0.0154036	0.015404	0.0155563	0.0141433	0.0201832	0.00675294	0.0141523	0.0152797	0.0199082	0.0130006	0.0636305	0.0216304	0.00529379	0.00749963	0.00858922	0.0068894	0.00748906	0.0136119	0.0162383	0.00810152
2,4-Dichlorobenzoic acid	2,4-Dichlorobenzoic acid	5787		188.951	N.D.	N.D.	N.D.	N.D.	N.D.	7.16416e-06	7.14047e-06	N.D.	N.D.	N.D.	N.D.	N.D.	N.D.	N.D.	N.D.	N.D.	N.D.	N.D.	N.D.	N.D.	N.D.	N.D.	N.D.	N.D.	N.D.	N.D.	1.3122e-05	9.91319e-06	N.D.	N.D.	N.D.	N.D.	N.D.	N.D.	N.D.	N.D.	N.D.	N.D.	N.D.	N.D.
2,6-Diaminopimelic acid	2,6-Diaminopimelic acid	439283	HMDB0001370	191.103	N.D.	N.D.	N.D.	N.D.	N.D.	2.59263e-05	2.78189e-05	N.D.	N.D.	N.D.	N.D.	N.D.	N.D.	N.D.	N.D.	N.D.	N.D.	N.D.	N.D.	N.D.	N.D.	N.D.	N.D.	N.D.	N.D.	N.D.	3.0458e-05	3.84289e-05	N.D.	N.D.	N.D.	N.D.	2.31052e-05	3.82679e-05	2.75948e-05	2.82596e-05	N.D.	N.D.	N.D.	N.D.
2-(Creatinine-3-yl)propionic acid	2-(Creatinine-3-yl)propionic acid			186.087	N.D.	4.43333e-06	N.D.	N.D.	2.50241e-05	N.D.	6.39889e-06	N.D.	5.75367e-05	2.71022e-05	N.D.	1.18193e-05	N.D.	N.D.	N.D.	N.D.	N.D.	N.D.	N.D.	N.D.	N.D.	N.D.	N.D.	N.D.	N.D.	2.3385e-05	2.03892e-05	1.90434e-05	N.D.	N.D.	9.64174e-06	N.D.	1.64248e-05	N.D.	1.73098e-05	1.75108e-05	N.D.	N.D.	N.D.	N.D.
2-Amino-2-(hydroxymethyl)-1,3-propanediol	2-Amino-2-(hydroxymethyl)-1,3-propanediol	6503		122.081	N.D.	N.D.	N.D.	N.D.	N.D.	N.D.	N.D.	N.D.	0.000920015	0.00036985	0.000260953	0.000185139	N.D.	N.D.	N.D.	N.D.	N.D.	N.D.	N.D.	N.D.	N.D.	N.D.	N.D.	N.D.	N.D.	N.D.	0.000171659	8.58728e-05	N.D.	N.D.	N.D.	7.95703e-05	N.D.	N.D.	N.D.	N.D.	N.D.	0.000220085	N.D.	N.D.
2-Amino-2-methyl-1,3-propanediol	2-Amino-2-methyl-1,3-propanediol	1531		106.086	N.D.	N.D.	N.D.	N.D.	N.D.	N.D.	N.D.	N.D.	N.D.	0.00027654	0.000247513	0.000315648	N.D.	N.D.	N.D.	N.D.	N.D.	N.D.	N.D.	N.D.	N.D.	N.D.	N.D.	N.D.	N.D.	N.D.	N.D.	N.D.	N.D.	0.000136924	0.000122367	0.000170949	N.D.	N.D.	N.D.	N.D.	N.D.	N.D.	N.D.	N.D.
2-Amino-3-phosphonopropionic acid	2-Amino-3-phosphonopropionic acid	3857	HMDB0000370	168.006	N.D.	5.25492e-06	N.D.	N.D.	N.D.	4.80621e-06	3.8302e-06	5.69626e-06	N.D.	2.53345e-05	1.61528e-05	6.80871e-06	1.83308e-05	3.37018e-05	1.9909e-05	3.69066e-05	3.95278e-05	8.74813e-05	3.21193e-05	5.40125e-05	N.D.	1.81092e-05	N.D.	3.11542e-06	N.D.	1.5915e-05	3.55301e-05	3.68137e-05	N.D.	4.43804e-06	8.4041e-06	1.64745e-05	2.51543e-05	2.9674e-05	1.13371e-05	1.07959e-05	6.10812e-05	3.6621e-05	2.86322e-05	1.92419e-05
2-Aminoadipic acid O-Acetylhomoserine	2-Aminoadipic acid O-Acetylhomoserine	92136 439389	HMDB0000510	162.076	0.00941158	0.00529031	0.00724783	0.00524116	0.0074603	0.00406252	0.00455849	0.00644525	0.00562858	0.00401587	0.00319477	0.00338959	0.00405145	0.00222042	0.00310131	0.00297289	0.00258429	0.00357265	0.00298625	0.00275654	0.00276356	0.00278569	0.00342999	0.00283825	0.00721764	0.00304994	0.00476214	0.0027167	0.00288527	0.00251822	0.00308	0.00335971	0.00397279	0.00414044	0.00593967	0.00577331	0.00445802	0.00621577	0.00392256	0.00389396
2-Aminobutyric acid 2-Aminoisobutyric acid	2-Aminobutyric acid 2-Aminoisobutyric acid	6657 6119	HMDB0000452 HMDB0001906	104.071	0.0566259	0.0210673	0.0349538	0.0195005	0.0305793	0.0331663	0.0305621	0.0309986	0.0311749	0.0217081	0.0243634	0.020047	0.0231299	0.0117994	0.0183384	0.016409	0.028209	0.0268407	0.0281753	0.0250329	0.0171521	0.01801	0.0190677	0.0192627	0.0538588	0.033051	0.0431116	0.0357993	0.0231192	0.0223704	0.0196091	0.0236416	0.0317236	0.0303591	0.0416307	0.037233	0.0366362	0.038891	0.0379372	0.0324707
2-Aminoethylphosphonic acid	2-Aminoethylphosphonic acid	339	HMDB0011747	124.017	2.8439e-05	7.77863e-06	2.13474e-05	N.D.	0.000242499	0.000229174	0.000180633	0.000178845	N.D.	N.D.	N.D.	N.D.	2.40534e-05	1.11975e-05	1.45333e-05	1.20101e-05	N.D.	7.17365e-06	N.D.	N.D.	7.22579e-06	9.14976e-06	9.40549e-06	N.D.	N.D.	N.D.	1.44643e-05	N.D.	N.D.	N.D.	N.D.	N.D.	1.74036e-05	2.98328e-05	3.38736e-05	2.14539e-05	N.D.	N.D.	N.D.	N.D.
2-Deoxyribose 1-phosphate	dR1P	5460448	HMDB0001351	213.017	3.93312e-05	1.36953e-05	4.40872e-06	5.36205e-06	N.D.	N.D.	1.29842e-05	9.47974e-06	0.000142041	8.71058e-05	2.0148e-05	1.89618e-05	N.D.	4.43129e-06	N.D.	9.67162e-06	9.69418e-06	N.D.	1.13127e-05	1.62278e-05	N.D.	9.18744e-06	3.00812e-06	4.19413e-06	N.D.	1.20772e-05	N.D.	4.85675e-06	8.20557e-06	8.23639e-06	2.04741e-05	2.85531e-06	4.58866e-06	5.69367e-06	1.46523e-05	6.38085e-06	N.D.	3.15615e-06	N.D.	N.D.
2-Hydroxy-4-methylvaleric acid	2-Hydroxy-4-methylvaleric acid	439960	HMDB0000624	131.071	0.00044072	9.88326e-05	0.000101884	9.84311e-05	0.000156825	0.000152934	0.000310711	0.000112539	0.000359918	0.000116396	0.000132685	0.000107828	0.000409069	0.000176152	0.00023777	0.00016822	0.000165811	0.000126533	9.13955e-05	8.90484e-05	0.000401883	0.000410138	0.000314441	0.000387531	0.000727486	0.000472361	0.000414626	0.000413797	0.000156171	0.000239093	0.00017079	0.000190368	0.000858174	0.000792774	0.00151234	0.00121436	0.000151257	0.000178484	0.000149127	0.000118291
2-Hydroxybutyric acid	2-HBA	440864	HMDB0000008	103.04	0.00375991	0.00183985	0.00242566	0.00222496	0.00243728	0.00236098	0.00258829	0.00226298	0.00451058	0.0039921	0.0037981	0.00391775	0.00187495	0.00226289	0.00226892	0.00234301	0.00274019	0.00339683	0.00336675	0.00331595	0.00198144	0.00204913	0.00233178	0.00184666	0.00294608	0.00259349	0.00235308	0.00243788	0.00287861	0.00379179	0.00393559	0.00409246	0.0027901	0.00344428	0.00403115	0.00326503	0.00384212	0.00386149	0.00405782	0.00412965
2-Hydroxyisobutyric acid	2-Hydroxyisobutyric acid	11671	HMDB0000729	103.04	0.000345247	0.00010354	0.000100352	8.87589e-05	0.000157997	0.000118891	0.000122935	0.000114491	0.00038603	0.00022311	0.000205349	0.000204592	0.000129247	8.22935e-05	N.D.	5.64388e-05	0.00011653	0.000144535	0.000120166	9.9573e-05	8.69834e-05	9.11745e-05	7.31597e-05	6.03906e-05	0.000189714	0.000206957	0.000119712	0.000114084	0.000157737	0.000203054	0.000210753	0.000226183	8.25958e-05	0.00012543	0.000104818	7.79505e-05	0.000130556	0.00011475	0.000136342	0.000118751
2-Hydroxyoctanoic acid-1 8-Hydroxyoctanoic acid-1	2-Hydroxyoctanoic acid 8-Hydroxyoctanoic acid	94180 69820	HMDB0000711	159.102	0.000838915	0.000258501	0.000144031	0.000158187	0.000301617	0.000313363	0.000361346	0.000240366	0.00110711	0.000607661	0.00125514	0.000636123	0.000478596	0.000198475	0.000268835	0.000221627	0.000201101	0.000251985	0.000118936	0.000159341	0.000242882	0.000290267	0.00017023	0.000123549	0.00102588	0.00051957	0.000443201	0.000500758	0.000284456	0.000210743	0.000382136	0.000309932	0.000272631	0.000253202	0.000271584	0.000215427	0.000442836	0.000859391	0.000387132	0.000356847
2-Hydroxyoctanoic acid-2 8-Hydroxyoctanoic acid-2	2-Hydroxyoctanoic acid 8-Hydroxyoctanoic acid	94180 69820	HMDB0000711	159.102	0.000162179	3.0027e-05	1.0902e-05	8.53172e-06	5.22881e-05	2.70693e-05	2.68197e-05	1.48463e-05	0.000157117	3.55649e-05	4.5833e-05	1.61187e-05	6.12377e-05	4.18076e-05	1.77058e-05	1.51855e-05	5.99532e-05	3.49539e-05	1.67649e-05	1.22666e-05	1.82304e-05	2.7943e-05	4.6364e-06	3.51088e-06	0.000118509	7.61096e-05	4.76708e-05	1.95745e-05	1.76492e-05	1.25609e-05	1.37256e-05	7.52473e-06	3.29277e-05	4.4722e-05	2.4365e-05	1.44017e-05	4.3309e-05	7.08796e-05	3.15678e-05	2.66551e-05
2-Hydroxyvaleric acid	2-Hydroxyvaleric acid	98009	HMDB0001863	117.055	0.000754394	0.000329211	0.000392687	0.000360549	0.000434401	0.00041947	0.000500881	0.00036327	0.000827648	0.000614625	0.000630605	0.000584836	0.00124796	0.00117706	0.00114573	0.00104416	0.000734909	0.000976633	0.00105834	0.000899805	0.000568834	0.000525179	0.000592452	0.000537988	0.000886326	0.000792711	0.000723592	0.000831856	0.000842239	0.00120145	0.000967839	0.00105749	0.00170333	0.00190293	0.00266943	0.00218902	0.0010128	0.00109404	0.00114771	0.00106986
2-Methylserine	2-Methylserine	439656		120.066	N.D.	0.000218103	0.000341645	0.000291585	0.000355901	0.000385983	0.000355124	0.00035668	N.D.	0.000369961	0.000374757	0.000396778	N.D.	0.000200901	0.000216148	0.000202798	N.D.	N.D.	N.D.	N.D.	N.D.	0.000388977	0.000294391	0.000252629	0.000817711	0.000355564	0.000919773	0.00051254	N.D.	N.D.	N.D.	N.D.	0.000341531	0.000309271	0.000488522	0.000433048	N.D.	0.000172349	0.000139855	N.D.
2-Oxoglutaric acid	2-OG	51	HMDB0000208	145.014	0.00013382	2.38563e-05	3.52052e-05	6.56402e-05	1.92317e-05	4.30882e-05	9.68323e-05	7.63781e-05	0.000113588	0.00010439	0.000179338	0.000108532	7.30159e-05	0.000105607	0.000163873	0.000158505	9.70419e-05	0.000147319	0.000188185	0.000138629	1.80589e-05	3.35577e-05	3.78222e-05	5.14231e-05	7.48395e-05	4.40029e-05	7.81767e-05	6.39025e-05	N.D.	2.84139e-05	0.000898109	7.9469e-05	2.28827e-05	5.24131e-05	7.12888e-05	3.6552e-05	0.000143125	0.000204303	0.000161509	0.000239852
2-Oxoisovaleric acid	2-KIV	49	HMDB0000019	115.04	N.D.	N.D.	N.D.	N.D.	N.D.	N.D.	0.000118726	N.D.	N.D.	N.D.	8.3202e-05	N.D.	N.D.	N.D.	N.D.	N.D.	N.D.	N.D.	0.000129461	N.D.	N.D.	N.D.	N.D.	0.000100895	N.D.	N.D.	0.000149219	0.000166407	N.D.	N.D.	0.000305393	8.6777e-05	N.D.	N.D.	0.000165722	0.000155448	0.000164093	0.000159286	0.000174252	0.000229491
2-Oxooctanoic acid	2-Oxooctanoic acid	67600		157.087	0.000251316	N.D.	1.72222e-05	N.D.	4.38523e-05	N.D.	N.D.	N.D.	0.000141006	5.64078e-05	6.13164e-05	3.21946e-05	N.D.	1.78758e-05	N.D.	N.D.	4.50639e-05	2.41097e-05	N.D.	N.D.	1.24386e-05	4.87307e-05	N.D.	N.D.	0.000115801	4.58262e-05	2.92874e-05	1.47495e-05	N.D.	N.D.	2.86516e-05	N.D.	2.24242e-05	1.77246e-05	N.D.	N.D.	6.06747e-05	7.15048e-05	5.02662e-05	3.30759e-05
2-Phenylethylamine	Phenylethylamine	1001	HMDB0012275	122.096	0.00143353	N.D.	0.00022831	0.000172167	N.D.	0.000249558	0.000170783	0.000195712	N.D.	0.000253097	0.000293017	N.D.	0.000814737	0.000235659	0.000181737	0.000168164	0.000369354	0.000420945	N.D.	N.D.	N.D.	0.000300408	0.000194201	N.D.	N.D.	0.000353014	0.00019334	0.000224785	N.D.	0.000229956	N.D.	N.D.	0.000928522	0.000625758	0.000532586	0.000463554	0.000432413	N.D.	0.000288957	N.D.
2-Phosphoglyceric acid	2-PG	439278	HMDB0003391	184.985	0.000466752	0.000182825	2.94853e-05	2.20164e-05	0.000686163	0.000254886	0.000284129	4.13073e-05	0.00269018	0.00178001	0.000347114	0.000125722	0.00088329	0.000304944	1.26281e-05	1.2683e-05	0.000556424	0.00025472	2.16348e-05	1.21112e-05	0.00010834	0.00041715	3.81937e-05	6.91298e-05	0.00113511	0.000737352	0.000178772	4.00727e-05	0.000293331	4.86332e-05	0.000124808	7.04056e-05	0.000107146	0.000123261	2.97662e-05	1.76261e-05	5.1534e-05	3.41017e-05	3.94446e-05	5.1237e-05
3',5'-ADP	3',5'-ADP	159296	HMDB0000061	426.021	0.00221014	0.000620608	0.000221914	0.000108158	0.000307928	0.000252881	8.75644e-05	1.19701e-05	0.00254881	0.00112057	0.000111967	3.13691e-05	0.00179353	0.00134462	0.000994546	0.000822627	0.00121731	0.00095321	0.000470599	0.000459435	0.000414827	0.000215183	0.0001276	9.28873e-06	0.00125038	0.000410149	0.000379207	0.000215962	5.52279e-05	1.03747e-05	7.95413e-05	2.31108e-05	0.000572074	0.000236491	0.000122362	4.93406e-05	0.000332064	0.000255927	0.000302868	2.78591e-05
3',5'-GDP	3',5'-GDP	3081995		442.016	N.D.	N.D.	N.D.	N.D.	N.D.	N.D.	N.D.	N.D.	N.D.	N.D.	N.D.	N.D.	N.D.	1.47733e-05	N.D.	3.9189e-06	1.32425e-05	5.61609e-06	N.D.	N.D.	N.D.	N.D.	N.D.	N.D.	N.D.	N.D.	N.D.	N.D.	N.D.	N.D.	N.D.	N.D.	N.D.	N.D.	N.D.	N.D.	N.D.	N.D.	N.D.	N.D.
3'-CMP 2'-CMP	3'-CMP 2'-CMP	66535 101544	HMDB0011692	322.044	0.0260503	0.00940497	0.0150033	0.0141567	0.0174235	0.0269307	0.0214243	0.0163494	0.0683626	0.0420052	0.0434999	0.0435801	0.021315	0.019908	0.0222057	0.0192037	0.0171093	0.0213157	0.0184178	0.0206329	0.0159314	0.017341	0.017663	0.0176519	0.00603345	0.00493454	0.00855476	0.00874451	0.00808946	0.0105672	0.0123847	0.0146416	0.00675011	0.00740599	0.00557513	0.00545541	0.00836172	0.00625632	0.0103018	0.0104002
3'-Dephospho CoA	Dephospho-CoA	444485	HMDB0001373	686.14	N.D.	0.00025947	0.000100225	0.000415618	N.D.	9.83625e-05	4.90158e-05	0.000147161	N.D.	N.D.	N.D.	N.D.	0.000313159	0.000554543	0.000434509	0.000699706	0.000732164	0.000762582	0.000746866	0.000721684	N.D.	N.D.	N.D.	6.2444e-05	N.D.	7.35487e-06	N.D.	0.00010511	N.D.	N.D.	N.D.	8.72532e-05	0.000199658	N.D.	5.26999e-05	0.000197711	0.000460713	0.000146745	0.000280454	0.000239507
3,4-Dihydroxymandelic acid	DHMA	85782	HMDB0001866	183.029	N.D.	N.D.	N.D.	N.D.	N.D.	N.D.	N.D.	N.D.	N.D.	N.D.	N.D.	N.D.	N.D.	N.D.	N.D.	N.D.	N.D.	N.D.	N.D.	N.D.	N.D.	N.D.	N.D.	N.D.	N.D.	N.D.	N.D.	N.D.	N.D.	N.D.	N.D.	N.D.	5.60225e-06	6.7969e-06	2.25854e-05	1.45431e-05	N.D.	N.D.	N.D.	N.D.
3,5-Diiodotyrosine	3,5-DI-Tyr	9305	HMDB0003474	433.875	N.D.	N.D.	N.D.	N.D.	N.D.	N.D.	N.D.	N.D.	N.D.	N.D.	N.D.	N.D.	N.D.	N.D.	N.D.	N.D.	N.D.	N.D.	2.04698e-05	2.38207e-05	N.D.	N.D.	N.D.	N.D.	N.D.	N.D.	1.36744e-05	N.D.	N.D.	N.D.	N.D.	N.D.	N.D.	N.D.	N.D.	N.D.	N.D.	N.D.	1.74697e-05	8.81101e-06
3-(2-Hydroxyphenyl)propionic acid 3-Phenyllactic acid Atrolactic acid p-Methoxyphenylacetic acid m-Ethoxybenzoic acid Tropic acid	3-(2-Hydroxyphenyl)propionic acid 3-Phenyllactic acid Atrolactic acid p-Methoxyphenylacetic acid m-Ethoxybenzoic acid Tropic acid	873 643327 1303 7690 12126 10726	HMDB0000748,HMDB0000779 HMDB0002072	165.055	0.000305757	5.71869e-05	7.45148e-05	7.41034e-05	0.000111934	0.000108814	0.000174	8.60005e-05	N.D.	0.000144633	0.000159884	0.000147464	0.000136904	0.000117957	0.000109643	9.92539e-05	0.000152341	0.000137233	0.000127762	0.000130188	0.000201835	0.000205062	0.000188954	0.000204311	0.00036384	0.00016811	0.000206581	0.000228424	0.000207064	0.000280183	0.000168413	0.000253787	0.000345801	0.000317318	0.000590224	0.000460723	0.000117296	9.57873e-05	0.000161706	0.000127491
3-(4-Hydroxyphenyl)propionic acid 3-(3-Hydroxyphenyl)propionic acid 2-(4-Hydroxyphenyl)propionic acid	3-(4-Hydroxyphenyl)propionic acid 3-(3-Hydroxyphenyl)propionic acid 2-(4-Hydroxyphenyl)propionic acid	10394 91 102526	HMDB0002199 HMDB0000375 HMDB0041683	165.055	N.D.	N.D.	N.D.	N.D.	2.50846e-05	3.56973e-05	0.000201143	4.87713e-05	N.D.	N.D.	N.D.	N.D.	0.000108481	N.D.	5.98851e-05	2.64064e-05	N.D.	2.43864e-05	N.D.	N.D.	N.D.	N.D.	N.D.	N.D.	0.000293079	0.000148934	0.000147982	0.000159962	N.D.	N.D.	N.D.	N.D.	9.40713e-05	5.51481e-05	0.000142411	0.000141866	N.D.	3.05072e-05	1.96246e-05	N.D.
3-(Methylthio)propionic acid	3-(Methylthio)propionic acid	563	HMDB0001527	119.017	N.D.	N.D.	N.D.	N.D.	N.D.	N.D.	6.12956e-06	N.D.	N.D.	N.D.	N.D.	N.D.	1.55328e-05	N.D.	9.55662e-06	N.D.	N.D.	N.D.	N.D.	N.D.	N.D.	N.D.	N.D.	N.D.	N.D.	N.D.	N.D.	4.74101e-06	N.D.	N.D.	N.D.	N.D.	1.08578e-05	9.05971e-06	1.31767e-05	1.49871e-05	N.D.	N.D.	N.D.	N.D.
3-Amino-2-piperidone	3-Amino-2-piperidone	5200225	HMDB0000323	115.087	0.000837519	0.000181744	0.000342211	0.000227917	0.00150872	0.00169309	0.00598897	0.00182781	0.00099545	0.0004979	0.000527597	0.000317771	0.000459564	0.000289329	0.000296493	0.000307567	0.000784883	0.000380545	0.000362135	0.000417149	0.000159025	0.000595611	0.000187852	0.00120302	0.00736947	0.00329689	0.00550848	0.00443513	0.00048546	0.000293599	0.000166288	0.000337563	0.000237924	0.00027695	0.000256194	0.000306794	0.000220474	0.00117484	0.00020195	0.000142221
3-Aminobutyric acid	3-Aminobutyric acid	10932		104.071	N.D.	N.D.	N.D.	0.000346484	N.D.	0.00055841	N.D.	0.000292297	N.D.	N.D.	N.D.	N.D.	N.D.	N.D.	N.D.	N.D.	N.D.	0.000158327	N.D.	N.D.	N.D.	N.D.	N.D.	N.D.	N.D.	0.000373766	0.000372462	0.00043614	N.D.	N.D.	N.D.	N.D.	0.00028904	0.000277132	0.000405167	0.000494221	0.000305456	0.000380976	0.00020234	0.000191219
3-Aminoisobutyric acid	3-Aminoisobutyric acid	64956	HMDB0003911	104.071	0.00270576	0.00130889	0.00139028	0.00150189	0.00451207	0.00562532	0.00547305	0.00402937	0.00646748	0.00521732	0.00495587	0.00530889	0.00704557	0.00539961	0.00603526	0.00617174	0.00179136	0.00156385	0.00205137	0.00201865	0.00127733	0.00120151	0.00130251	0.00138326	0.00695159	0.00558892	0.00676102	0.00647473	0.00503049	0.00519118	0.00443029	0.00476542	0.00794311	0.00848404	0.0093578	0.00887237	0.00128388	0.00114234	0.00145325	0.00118882
3-Dehydroshikimic acid	3-Dehydroshikimic acid	439774		171.03	N.D.	N.D.	N.D.	N.D.	N.D.	3.27605e-06	3.97314e-06	N.D.	N.D.	1.42984e-05	1.33367e-05	N.D.	N.D.	N.D.	N.D.	N.D.	N.D.	N.D.	N.D.	N.D.	7.61994e-06	7.22662e-06	5.86909e-06	N.D.	N.D.	N.D.	N.D.	N.D.	N.D.	N.D.	N.D.	N.D.	N.D.	N.D.	N.D.	N.D.	N.D.	N.D.	N.D.	N.D.
3-Guanidinopropionic acid	3-Guanidinopropionic acid	67701		132.077	N.D.	0.00010794	N.D.	0.000140546	0.000203243	0.000168557	0.00015687	0.00014634	N.D.	0.00017812	0.000158346	0.000170136	0.000283662	0.000231616	0.000208852	0.000230687	0.000750796	0.00047004	0.00072603	0.000804266	N.D.	0.000224969	N.D.	0.000126849	N.D.	0.000392887	0.000248807	0.000269389	N.D.	0.000298532	0.000184681	0.000223974	0.000189128	0.0002676	0.000338012	0.000289855	0.00042847	0.00045654	0.000461037	0.000262578
3-Hydroxy-2-methyl-4-pyrone	3-Hydroxy-2-methyl-4-pyrone	8369	HMDB0030776	127.039	0.0262291	0.00900893	0.0136399	0.012444	0.0170292	0.0211345	0.0173855	0.016461	0.052567	0.0223253	0.0243695	0.024227	0.0261157	0.0184578	0.0211523	0.0241446	0.0285812	0.0256852	0.0277308	0.0289308	0.00544273	0.00441348	0.00818938	0.0053239	0.011096	0.00787854	0.00914706	0.00692074	0.00901336	0.00980232	0.00854215	0.0104385	0.00977487	0.0115558	0.0108739	0.0109133	0.0159446	0.0138157	0.0135125	0.0117329
3-Hydroxy-3-methylglutaric acid	3-Hydroxy-3-methylglutaric acid	1662		161.045	0.000358974	0.000123694	0.000190588	0.000167031	0.000203962	0.000193303	0.000181652	0.000183971	N.D.	0.000155176	0.000157246	0.000155159	0.000138328	0.000115653	0.000124309	0.000106745	0.000115063	0.000143995	0.000125214	0.00011298	0.000263413	0.000267036	0.000279412	0.000265314	0.000620428	0.000526686	0.000486371	0.000523428	0.000730247	0.000712902	0.000456641	0.00070332	0.000411119	0.000460431	0.000527734	0.000557091	0.00017304	0.00019549	0.000209396	0.000211796
3-Hydroxybutyric acid	3-HBA	441	HMDB0000011,HMDB0000357,HMDB0000442	103.04	0.00311081	0.00120251	0.00216826	0.00194436	0.00893343	0.00839786	0.00943892	0.0083608	0.010674	0.00891214	0.00775076	0.00770273	0.00534138	0.0050672	0.00660517	0.0053018	0.00255902	0.00346595	0.00379436	0.00291649	0.00156846	0.00130719	0.00166608	0.00128241	0.0101151	0.0100749	0.00925431	0.00849468	0.00996989	0.0110959	0.0097269	0.0119324	0.0100971	0.0100759	0.0133452	0.0116772	0.00606632	0.00549434	0.00481138	0.00624068
3-Hydroxykynurenine	3-OHKY	11811	HMDB0011631	225.087	N.D.	6.78642e-06	N.D.	N.D.	2.07017e-05	1.25794e-05	5.49066e-06	N.D.	N.D.	1.59363e-05	1.13631e-05	N.D.	2.5854e-05	3.36155e-05	2.37963e-05	4.18275e-05	N.D.	N.D.	1.39995e-05	1.79107e-05	1.08197e-05	N.D.	N.D.	1.99844e-05	0.000113608	5.95928e-05	0.000151528	8.63181e-05	5.00805e-05	4.85545e-05	7.50874e-05	8.68091e-05	5.11559e-05	2.6253e-05	6.93411e-05	7.61649e-05	3.99291e-05	4.15152e-05	6.57747e-05	3.42157e-05
3-Indoxylsulfuric acid	3-Indoxylsulfuric acid	10258	HMDB0000682	212.002	9.1544e-05	5.15921e-05	5.70966e-05	6.67344e-05	0.000458365	0.00047178	0.000593916	0.000452109	0.00048878	0.000283798	0.000291395	0.000314186	0.00051578	0.000378483	0.000364331	0.000332099	9.37623e-05	0.000131311	0.000113136	0.000102646	7.92677e-05	6.98e-05	8.83667e-05	5.86899e-05	0.000520261	0.00026218	0.000341834	0.000342267	0.000183908	0.00012734	0.000288526	0.000246431	0.000260369	0.000383269	0.000250591	0.000328843	0.000128582	0.000139556	0.000120899	0.000118919
3-Iodotyrosine	MIT	439744	HMDB0000021	307.978	N.D.	N.D.	N.D.	N.D.	N.D.	N.D.	N.D.	N.D.	N.D.	N.D.	N.D.	N.D.	N.D.	N.D.	N.D.	N.D.	N.D.	N.D.	N.D.	N.D.	N.D.	N.D.	N.D.	N.D.	3.76275e-05	N.D.	N.D.	N.D.	N.D.	N.D.	N.D.	N.D.	N.D.	N.D.	N.D.	N.D.	N.D.	N.D.	N.D.	N.D.
3-Mercaptolactic acid	3-Mercaptolactic acid	160645	HMDB0002127	120.996	N.D.	N.D.	N.D.	1.18626e-05	N.D.	1.67489e-05	1.74731e-05	1.91606e-05	N.D.	N.D.	N.D.	N.D.	N.D.	7.98742e-06	N.D.	1.1034e-05	N.D.	6.62783e-06	9.68566e-06	N.D.	9.02724e-06	N.D.	9.60088e-06	2.26026e-05	N.D.	9.97726e-06	N.D.	3.04885e-05	N.D.	N.D.	N.D.	2.39352e-05	1.44291e-05	N.D.	6.27545e-06	1.9096e-05	2.53711e-05	1.9546e-05	2.87765e-05	3.36142e-05
3-Methoxytyrosine	3-Methoxytyrosine	1670	HMDB0001434	212.092	0.000282761	0.000120357	0.000154677	0.000124452	0.000154601	0.000169144	0.000118211	0.000141931	9.64803e-05	0.00017671	0.000207418	0.00018394	0.000187574	0.000113459	0.000128824	0.000110091	0.000115737	0.000102063	0.000100134	9.33782e-05	0.000108072	0.000112418	0.000122022	9.67527e-05	0.000146618	0.000133217	0.0001551	0.000132213	0.000223929	0.000262578	0.00024246	0.000267798	0.00021194	0.000186711	0.000246239	0.000236116	0.000119906	0.000120637	0.000135347	0.000129904
3-Methyladenine	3-Methyladenine	1673	HMDB0011600	150.078	N.D.	N.D.	N.D.	N.D.	N.D.	N.D.	N.D.	N.D.	N.D.	N.D.	N.D.	N.D.	N.D.	N.D.	N.D.	N.D.	N.D.	N.D.	N.D.	N.D.	N.D.	N.D.	N.D.	N.D.	N.D.	N.D.	N.D.	N.D.	3.09917e-05	3.57692e-05	2.59236e-05	4.14856e-05	N.D.	4.62834e-06	1.04951e-05	9.12635e-06	N.D.	N.D.	N.D.	N.D.
3-Methylcrotonyl CoA_divalent	3-Methylcrotonyl-CoA	9549326		423.571	N.D.	N.D.	N.D.	N.D.	N.D.	1.40131e-05	9.44128e-05	1.12803e-05	N.D.	1.34044e-05	2.46427e-05	1.25423e-05	0.000127646	5.15812e-05	6.67202e-05	5.56912e-05	N.D.	N.D.	N.D.	N.D.	N.D.	2.66463e-06	5.07787e-06	N.D.	N.D.	N.D.	N.D.	N.D.	N.D.	N.D.	4.74405e-06	9.25533e-06	1.87354e-05	2.32385e-05	1.15634e-05	1.02892e-05	N.D.	N.D.	N.D.	N.D.
3-Methylhistidine 1-Methylhistidine	3-Methylhistidine 1-Methylhistidine	64969 92105	HMDB0000479 HMDB0000001	170.092	0.00625809	0.00276352	0.0063179	0.00565176	0.0122218	0.0135445	0.00967481	0.011813	0.0103065	0.0073188	0.00610855	0.00568174	0.00701649	0.00521012	0.00588176	0.00568394	0.00402217	0.00448967	0.00411563	0.00405737	0.0038712	0.00396411	0.00499829	0.00206154	0.0108935	0.0105162	0.0111039	0.00908846	0.0082262	0.00982763	0.00687741	0.00773372	0.00963667	0.00880882	0.0120042	0.011588	0.00473692	0.00501801	0.00517717	0.005096
3-Methylxanthine	3-Methylxanthine	70639	HMDB0001886	165.041	N.D.	N.D.	N.D.	N.D.	5.61228e-05	6.38691e-05	6.92295e-05	5.65324e-05	N.D.	4.68151e-06	N.D.	N.D.	1.97636e-05	2.34368e-05	2.79027e-05	2.81696e-05	N.D.	N.D.	N.D.	N.D.	6.5845e-06	N.D.	4.11777e-06	6.11945e-06	6.6045e-05	6.27862e-05	7.19563e-05	6.09362e-05	N.D.	N.D.	N.D.	N.D.	1.72141e-05	2.96196e-05	4.48889e-05	3.92232e-05	N.D.	N.D.	N.D.	N.D.
3-Phenylpropionic acid	3-Phenylpropionic acid	107	HMDB0000764	149.06	0.00258508	0.000492095	0.000250082	0.000157321	0.00086937	0.00039705	0.000296328	0.0002586	0.00302761	0.000479298	0.000178672	0.000261646	0.00101505	0.000405467	0.000352675	0.000225861	0.000790873	0.00044865	0.00024269	0.000258048	0.000234904	0.000430378	0.00020062	0.000118054	0.00137571	0.000773218	0.000462475	0.000244696	0.00037495	0.000208951	0.000265986	0.000175528	0.000628299	0.000654365	0.000617669	0.000464017	0.000250235	0.000271184	0.000226348	0.000134294
3-Phosphoglyceric acid	3-PG	439183	HMDB0000807	184.985	0.00284476	0.00138278	0.000205934	0.000158804	0.00518111	0.00203404	0.00194592	0.000228683	0.0167507	0.0133418	0.00258126	0.000903195	0.00753407	0.00278663	0.000157297	9.21285e-05	0.00524974	0.00264059	0.000168811	9.43183e-05	0.000784432	0.00353158	0.000184988	0.000482653	0.00713133	0.00540699	0.00138423	0.000282708	0.00182437	0.000248971	0.000545044	0.000375562	0.000817728	0.00114745	0.000165292	0.000115933	0.000415893	0.000210888	0.000180145	0.000292328
4-(β-Acetylaminoethyl)imidazole	4-(b-Acetylaminoethyl)imidazole	69602		154.098	9.47405e-05	3.89987e-05	6.00035e-05	3.57273e-05	0.000168003	0.000195163	0.000341217	0.000192137	0.000120508	6.19255e-05	5.86622e-05	4.60092e-05	9.85548e-05	0.000476652	0.000207334	0.000296723	6.7892e-05	5.72287e-05	5.01512e-05	7.49705e-05	4.90477e-05	5.15385e-05	6.02885e-05	4.58359e-05	0.000761523	0.000266072	0.000614207	0.000421995	N.D.	9.4473e-06	1.43522e-05	2.4446e-05	4.83226e-05	8.57319e-05	0.000106939	0.000108054	1.84288e-05	3.51734e-05	3.38573e-05	2.57611e-05
4-Acetamidobutanoic acid	4-Acetamidobutanoic acid	18189	HMDB0003681	144.066	0.000133083	6.57596e-05	9.15181e-05	4.81274e-05	0.000865673	0.000807257	0.00226562	0.0010582	N.D.	1.32654e-05	1.06784e-05	1.53247e-05	0.000588029	0.000267536	0.000475336	0.000295633	N.D.	N.D.	8.96804e-06	N.D.	9.05729e-05	9.50783e-05	5.25877e-05	6.26743e-05	0.00176281	0.000495402	0.00124979	0.000784067	1.67184e-05	2.57774e-05	3.81495e-05	1.27538e-05	0.000284245	0.000286374	0.000506373	0.000393996	1.14884e-05	N.D.	1.29844e-05	N.D.
4-Amino-3-hydroxybutyric acid	4-Amino-3-hydroxybutyric acid	2149		120.065	N.D.	N.D.	N.D.	N.D.	N.D.	N.D.	N.D.	N.D.	N.D.	N.D.	N.D.	N.D.	N.D.	N.D.	N.D.	N.D.	N.D.	N.D.	0.000126424	N.D.	N.D.	N.D.	N.D.	N.D.	N.D.	N.D.	N.D.	N.D.	N.D.	N.D.	N.D.	N.D.	N.D.	N.D.	N.D.	N.D.	N.D.	N.D.	7.0381e-05	N.D.
4-Aminohippuric acid	4-Aminohippuric acid	2148	HMDB0001867	195.077	N.D.	N.D.	N.D.	N.D.	N.D.	1.16323e-05	N.D.	N.D.	N.D.	1.10164e-05	N.D.	N.D.	N.D.	1.17051e-05	N.D.	1.5434e-05	N.D.	N.D.	N.D.	N.D.	N.D.	N.D.	N.D.	N.D.	N.D.	N.D.	N.D.	N.D.	N.D.	1.42141e-05	1.9186e-05	2.07657e-05	4.2966e-05	3.10082e-05	4.79486e-05	4.05402e-05	N.D.	N.D.	N.D.	N.D.
4-Guanidinobutyric acid	4-GBA	500	HMDB0003464	146.093	0.00150548	0.000389072	0.000321625	0.000303797	0.00107306	0.00117935	0.000818332	0.000767944	0.000521467	0.000229589	0.000187896	0.00015434	0.00067272	0.000350628	0.000393391	0.000300035	0.000759954	0.00069532	0.000803316	0.000780791	0.000153716	0.00133938	0.000136418	0.000170987	0.000869853	0.000568001	0.000851449	0.000539772	0.000153034	0.000125783	0.000182615	0.000173166	0.000357218	0.000537831	0.000508528	0.000417116	0.000255419	0.000333187	0.00040155	0.000212557
4-Hydroxy-3-methoxyphenylglycol sulfate	4-Hydroxy-3-methoxyphenylglycol sulfate	3035420	HMDB0003332	263.023	N.D.	N.D.	N.D.	8.84607e-06	3.95687e-05	2.9088e-05	5.76685e-05	2.7733e-05	N.D.	N.D.	N.D.	N.D.	N.D.	2.63545e-05	2.42454e-05	1.86641e-05	N.D.	N.D.	2.2147e-05	N.D.	N.D.	N.D.	N.D.	N.D.	2.96772e-05	N.D.	2.55588e-05	2.3326e-05	N.D.	N.D.	N.D.	N.D.	N.D.	1.46803e-05	N.D.	1.35333e-05	N.D.	N.D.	1.27396e-05	N.D.
4-Hydroxyphenylacetaldehyde	4-Hydroxyphenylacetaldehyde	440113	HMDB0003767	135.045	0.000263918	0.000405772	0.000233573	0.000133445	0.000731344	0.000407994	0.00025465	0.000104048	N.D.	0.000413796	0.000201852	8.35085e-05	9.35463e-05	0.000285768	0.000157123	0.000105353	0.000908709	0.000742907	0.000174459	0.000134206	0.000242339	0.000406771	0.000165965	4.05544e-05	0.00152962	0.000771346	0.000431326	7.13533e-05	0.000377998	0.000252606	9.37419e-05	9.3966e-05	0.000447729	0.000500096	0.00020566	0.00012271	0.000261396	0.00010491	0.000186175	N.D.
4-Methyl-2-oxovaleric acid 3-Methyl-2-oxovaleric acid 2-Oxohexanoic acid	2-Oxoleucine 2K3MVA 2-Oxohexanoic acid	70 47 159664	HMDB0000695 HMDB0000491 HMDB0001864	129.056	N.D.	0.000129173	9.4601e-05	0.000148233	0.0002289	0.000221648	0.000440198	0.000317272	N.D.	0.000141134	0.000204239	0.000242986	0.000315438	0.000235966	0.000271064	0.000342087	0.000265199	0.000301452	0.000555933	0.000342424	0.000224004	0.000208397	0.000252342	0.000204408	0.000587045	0.000145141	0.000468251	0.000609823	0.00012114	0.000157877	0.00179299	0.000357646	0.000256476	0.000486937	0.000528737	0.000486103	0.000646169	0.000658238	0.000813597	0.000964378
4-Methylpyrazole	4-Methylpyrazole	3406		83.0603	0.000565008	0.000265978	0.000331456	0.000269328	0.000316152	0.000347826	0.000263239	0.000294272	0.000519015	0.00023031	0.000326485	0.000275407	0.000284394	0.000164343	0.000210922	0.000198475	0.000141114	0.000229191	0.000208316	0.000246436	0.000253435	0.000240014	0.000278248	0.00020822	0.000369194	0.000276025	0.00029979	0.000299609	0.000256553	0.000298957	0.000253447	0.000251145	0.000273916	0.000267997	0.00028855	0.000262054	0.000185219	0.000221743	0.000172265	0.000157114
4-Oxopyrrolidine-2-carboxylic acid	4-Oxopyrrolidine-2-carboxylic acid	107541		130.05	0.232967	0.0988543	0.164645	0.134265	0.158614	0.11106	0.134575	0.131908	0.172733	0.147429	0.124489	0.126683	0.11915	0.0752528	0.0971962	0.0931979	0.0900197	0.0930887	0.08882	0.105078	0.124702	0.13127	0.156217	0.123075	0.354135	0.233933	0.231126	0.202849	0.232288	0.188589	0.143618	0.17119	0.145411	0.156219	0.173411	0.198537	0.135582	0.138904	0.110542	0.12765
4-Oxovaleric acid	4-Oxovaleric acid	11579	HMDB0000720	115.04	0.00202858	0.000260297	0.000126636	0.000117302	0.00040448	0.000201376	0.000331842	0.000125093	0.000655701	0.000342161	0.000134728	0.000232205	0.000302847	0.000127758	0.000167981	0.000153462	0.000299955	0.00019268	0.000110492	0.000122224	9.75449e-05	0.000188606	N.D.	7.85967e-05	0.00204164	0.00053429	0.000907159	0.000600981	N.D.	0.000114353	0.000381949	0.000165065	0.000149793	0.000249853	0.000190238	0.000117211	0.000140418	0.000192744	0.000161205	N.D.
5'-Deoxy-5'-methylthioadenosine	MTA	439176	HMDB0001173	298.097	0.000592465	0.000203319	0.000315909	0.000194654	0.00068656	0.000476537	0.000213971	0.000269004	6.56279e-05	0.000132313	8.85456e-05	9.27765e-05	0.000314177	0.000118068	0.000187831	0.000128328	0.000227624	0.000228478	0.00017015	0.000169568	0.000779736	0.000632932	0.000582955	0.000775594	0.000942095	0.00151071	0.00118616	0.0010864	0.00133492	0.00227093	0.00112625	0.000924003	0.000832474	0.000643632	0.000970896	0.000831623	0.000573324	0.000650259	0.000555819	0.000379066
5,6,7,8-Tetrahydrobiopterin	5,6,7,8-Tetrahydrobiopterin	44257	HMDB0000027	242.125	N.D.	N.D.	N.D.	1.29273e-05	N.D.	N.D.	N.D.	N.D.	N.D.	N.D.	N.D.	N.D.	N.D.	N.D.	N.D.	N.D.	N.D.	N.D.	N.D.	N.D.	N.D.	N.D.	N.D.	N.D.	N.D.	N.D.	N.D.	N.D.	N.D.	N.D.	N.D.	N.D.	4.04763e-05	N.D.	N.D.	5.68182e-05	N.D.	N.D.	8.91522e-06	3.3088e-05
5-Amino-4-oxovaleric acid	5-ALA	137	HMDB0001149	132.066	N.D.	0.000124453	0.000157051	0.000141148	N.D.	0.000111326	0.000131699	0.000182194	N.D.	N.D.	N.D.	N.D.	N.D.	N.D.	N.D.	0.000100657	0.000184578	N.D.	0.000129744	0.000145808	N.D.	N.D.	N.D.	N.D.	N.D.	N.D.	0.000125839	0.000136066	N.D.	N.D.	N.D.	N.D.	0.000120398	0.000105189	0.000165124	0.000143113	0.000137352	N.D.	0.000134737	9.43503e-05
5-Aminoimidazole-4-carboxamide ribotide	AICAR	65110	HMDB0001517	337.055	0.000173329	9.09825e-05	0.000168878	9.42035e-05	0.000349475	0.000505826	4.35388e-05	0.000253163	0.000208516	0.000158527	0.000137837	0.00018646	7.0479e-05	7.74103e-05	6.9364e-05	6.80024e-05	0.000122514	0.000152679	0.000147196	0.00010232	5.84944e-05	4.92204e-05	7.26362e-05	6.54648e-05	0.000286279	0.000355445	0.000365931	0.000344518	0.000149893	0.000193024	0.000192612	0.000421057	7.63778e-05	0.000112779	6.29075e-05	6.85458e-05	0.000220682	0.000275773	0.000289685	0.000163968
5-Aminoindole	5-Aminoindole	78867		133.076	0.00081364	0.000212667	0.000119526	8.80331e-05	0.000375351	0.000215407	8.79331e-05	0.000135019	0.00102295	0.000207692	0.000111346	0.000129337	0.000404243	0.000198163	9.93303e-05	0.000107269	0.00028397	0.000138109	0.000109579	0.000193773	0.000105504	0.000152727	0.000115362	5.39604e-05	0.000438335	0.000254756	0.000157025	0.000175418	0.000135462	7.32874e-05	0.000107723	6.47217e-05	0.000109741	0.000115085	0.000122777	8.28095e-05	0.000116155	7.80028e-05	0.000105379	6.58547e-05
5-Aminovaleric acid	5-Aminovaleric acid	138	HMDB0003355	118.086	0.0923629	0.0280333	0.0478811	0.0477136	0.0390458	0.0273615	0.0429571	0.034535	N.D.	N.D.	N.D.	N.D.	0.0135388	0.00775733	0.00885041	0.00777756	N.D.	N.D.	0.00757607	0.00717352	0.0363056	0.022941	0.0293196	0.0417665	0.113515	0.0566911	0.0920309	0.073574	N.D.	N.D.	N.D.	N.D.	0.0262713	0.0304183	0.0395718	0.0406006	0.00718462	N.D.	0.00656329	0.00471558
5-Hydroxyindoleacetic acid	5-Hydroxy-IAA	1826	HMDB0000763	190.051	0.00892383	0.00352356	0.00493459	0.00463647	0.00293321	0.00268667	0.00271178	0.00302785	0.00528125	0.00323174	0.00467021	0.00377448	0.00453324	0.00372127	0.00330195	0.00272764	0.00279092	0.00430762	0.00383776	0.00366649	0.000407005	0.000406125	0.000667232	0.000387477	5.74372e-05	1.86979e-05	6.89901e-05	8.75031e-05	3.90487e-05	2.96614e-05	0.00014001	0.000395083	0.000116681	0.000368789	2.08013e-05	5.16233e-05	0.000352263	0.000576828	0.00109369	0.000404607
5-Hydroxylysine	5-Hydroxylysine	3032849	HMDB0000450	163.108	0.00350637	0.00111551	0.0016095	0.00152044	0.00135768	0.00130272	0.00132179	0.00140461	0.00254179	0.00186389	0.00196603	0.00173043	0.000967667	0.000805601	0.000742448	0.000709361	0.000664849	0.000835301	0.000726387	0.000667214	0.00145948	0.00206506	0.00236306	0.00158162	0.00279796	0.00185958	0.00147546	0.00147322	0.00138237	0.00149759	0.0014395	0.00151054	0.00135236	0.00160724	0.00192998	0.0017919	0.00106689	0.00163311	0.00104996	0.000955142
5-Hydroxypentanoic acid	5-Hydroxypentanoic acid	25945	HMDB0061927	117.055	8.54562e-05	2.02773e-05	9.93267e-06	1.37628e-05	3.42685e-05	2.21396e-05	1.97787e-05	1.23396e-05	5.03276e-05	1.67042e-05	1.41118e-05	2.43242e-05	4.80606e-05	2.80761e-05	4.24541e-05	3.09379e-05	1.68529e-05	2.10257e-05	1.46752e-05	1.94209e-05	1.32625e-05	3.34269e-05	1.37066e-05	6.73214e-06	5.69612e-05	3.03414e-05	4.39098e-05	2.74429e-05	1.28656e-05	1.69531e-05	1.73167e-05	1.41095e-05	9.02916e-05	8.68614e-05	0.000136573	0.000106297	1.47424e-05	2.95082e-05	2.68073e-05	1.87631e-05
5-Hydroxytryptophan	Pretonine	439280	HMDB0000472	221.092	N.D.	1.5875e-05	N.D.	1.69272e-05	N.D.	2.0249e-05	N.D.	1.36558e-05	4.10685e-05	4.34414e-05	2.35719e-05	1.28875e-05	N.D.	N.D.	N.D.	7.54446e-06	N.D.	2.64663e-05	1.18167e-05	2.15019e-05	N.D.	N.D.	N.D.	N.D.	N.D.	N.D.	1.70692e-05	N.D.	N.D.	N.D.	N.D.	N.D.	N.D.	N.D.	N.D.	N.D.	N.D.	N.D.	6.63402e-06	N.D.
5-Methoxyindoleacetic acid Indole-3-lactic acid	5-MIAA Indolelactic acid	18986 676157	HMDB0004096 HMDB0000671	204.066	0.000127125	5.42965e-05	6.91117e-05	6.04313e-05	9.50596e-05	9.53446e-05	0.000131776	9.94625e-05	0.000128898	0.000108388	0.000116815	0.000115498	0.000557266	0.000237935	0.000421021	0.000273067	8.18461e-05	8.445e-05	9.24968e-05	7.75959e-05	0.000101667	0.000113039	0.000119582	9.44895e-05	0.0001217	9.05496e-05	8.58509e-05	0.0001008	0.000105856	0.000152299	0.000111601	0.000118745	0.000503216	0.000535069	0.00110116	0.000930506	0.000107275	0.000131672	0.000131152	0.000102723
5-Methyl-2'-deoxycytidine	5-Methyl-2'-deoxycytidine	440055	HMDB0002224	242.114	N.D.	N.D.	N.D.	N.D.	N.D.	N.D.	N.D.	N.D.	N.D.	N.D.	N.D.	N.D.	N.D.	N.D.	N.D.	N.D.	N.D.	N.D.	N.D.	N.D.	N.D.	N.D.	N.D.	2.79455e-05	N.D.	N.D.	N.D.	N.D.	N.D.	7.87071e-06	N.D.	1.15698e-05	N.D.	N.D.	N.D.	1.73774e-05	N.D.	N.D.	N.D.	N.D.
5-Methylcytosine	5-Methylcytosine	65040	HMDB0002894	126.066	N.D.	N.D.	N.D.	5.19336e-06	N.D.	N.D.	N.D.	N.D.	N.D.	N.D.	N.D.	N.D.	N.D.	N.D.	6.14725e-06	N.D.	N.D.	N.D.	N.D.	N.D.	N.D.	2.42092e-05	N.D.	N.D.	N.D.	N.D.	1.20417e-05	9.7379e-06	N.D.	N.D.	N.D.	N.D.	5.50873e-06	N.D.	N.D.	5.9935e-06	N.D.	N.D.	N.D.	N.D.
5-Methyltetrahydrofolic acid	5-MTHF	444412	HMDB0001396	460.194	0.000451571	0.000377371	0.000309251	0.000344806	8.9363e-05	0.000183618	5.05601e-05	5.97822e-05	N.D.	1.92575e-05	3.99865e-05	2.63609e-05	0.000127391	0.000170741	0.000115669	0.00020172	0.000382861	0.000300663	0.000362628	0.000340597	3.90087e-05	6.98612e-05	5.08865e-05	5.57903e-05	N.D.	7.10839e-05	2.78523e-05	4.11005e-05	N.D.	8.36216e-05	N.D.	5.02239e-05	4.62104e-05	3.07269e-05	5.4427e-05	1.8653e-05	0.000148405	3.57058e-05	7.11024e-05	5.42567e-05
5-Oxo-2-tetrahydrofurancarboxylic acid	5-Oxo-2-tetrahydrofurancarboxylic acid	251524		129.019	N.D.	N.D.	N.D.	N.D.	N.D.	N.D.	N.D.	N.D.	N.D.	N.D.	4.92508e-05	N.D.	N.D.	6.01191e-05	N.D.	6.32424e-05	N.D.	N.D.	N.D.	N.D.	N.D.	7.69175e-05	N.D.	N.D.	N.D.	N.D.	N.D.	N.D.	N.D.	N.D.	N.D.	N.D.	N.D.	N.D.	8.03092e-05	6.67841e-05	N.D.	N.D.	N.D.	N.D.
5-Oxohexanoic acid	5-Oxohexanoic acid	18407		129.056	0.00192489	0.000242459	0.000169095	0.0001401	0.000545682	0.000213736	0.000150026	0.000139587	0.0014708	0.000356327	0.000125544	0.000106845	0.00083989	0.000175815	0.000123897	9.44129e-05	0.000752341	0.000382004	0.000152895	0.000127905	0.000193876	0.000301825	0.000127209	7.18924e-05	0.000860026	0.00057282	0.000320574	0.00015281	0.000232452	0.000178391	0.000129946	0.000114765	0.000393304	0.000314286	0.000204651	9.74834e-05	0.000223733	0.000172979	0.00012919	7.91392e-05
5-Oxoproline	Oxoproline	7405	HMDB0000267	128.035	0.0231797	0.00958423	0.0160049	0.0127377	0.0176344	0.0144726	0.0160009	0.0192945	0.0215311	0.0159188	0.018995	0.018505	0.00667059	0.00550855	0.00817242	0.00456436	0.00514292	0.00450978	0.00401217	0.00360486	0.0125372	0.0144423	0.0126898	0.0137767	0.0255254	0.0244347	0.0158066	0.0206958	0.0344907	0.0300294	0.0337916	0.0331455	0.0161966	0.0160446	0.0226659	0.0166916	0.00540979	0.00865796	0.00760895	0.00768655
6-Aminohexanoic acid	6-Aminohexanoic acid	564	HMDB0001901	132.102	N.D.	N.D.	N.D.	N.D.	N.D.	0.000139147	N.D.	N.D.	N.D.	0.000315575	N.D.	0.000309322	N.D.	N.D.	N.D.	N.D.	N.D.	N.D.	N.D.	N.D.	N.D.	N.D.	N.D.	N.D.	N.D.	N.D.	0.000198477	N.D.	N.D.	N.D.	0.000296789	0.000121737	0.000152628	N.D.	N.D.	N.D.	0.000172327	0.000203883	N.D.	N.D.
6-Hydroxyhexanoic acid	6-Hydroxyhexanoic acid	14490		131.071	0.000128209	2.44591e-05	2.29316e-05	1.32147e-05	7.34891e-05	3.30923e-05	3.53812e-05	3.33451e-05	0.000123011	5.24303e-05	6.56117e-05	3.8468e-05	7.63997e-05	5.08853e-05	5.33948e-05	4.09626e-05	3.76641e-05	3.24704e-05	2.46633e-05	1.76285e-05	2.84333e-05	4.6532e-05	3.23246e-05	1.97861e-05	6.34588e-05	5.79375e-05	8.80446e-05	4.93822e-05	1.32151e-05	3.47033e-05	2.75616e-05	1.25691e-05	4.92608e-05	5.92288e-05	4.07793e-05	3.4101e-05	4.27321e-05	6.52733e-05	4.45942e-05	3.13705e-05
6-Hydroxynicotinic acid	6-Hydroxynicotinic acid	72924	HMDB0002658	138.019	N.D.	N.D.	N.D.	N.D.	N.D.	N.D.	N.D.	N.D.	N.D.	N.D.	N.D.	N.D.	N.D.	N.D.	N.D.	N.D.	N.D.	N.D.	N.D.	N.D.	N.D.	0.000180355	N.D.	N.D.	N.D.	N.D.	N.D.	N.D.	N.D.	N.D.	N.D.	N.D.	N.D.	N.D.	N.D.	N.D.	N.D.	N.D.	N.D.	N.D.
6-Phosphogluconic acid	6-PG	91493	HMDB0001316	275.017	0.0012508	0.000786905	0.000651628	0.000893307	0.00176719	0.00263521	0.00225137	0.00153201	0.00473551	0.00417614	0.0037474	0.00341349	0.00516135	0.00989476	0.00428142	0.00847818	0.00481307	0.00492816	0.00499096	0.00418594	0.00159666	0.00160304	0.0011153	0.000972871	0.00266079	0.00982715	0.00237119	0.00313915	0.000606522	0.00126818	0.00231759	0.000950951	0.00172057	0.00117331	0.000335938	0.000441387	0.00184458	0.000612173	0.000725391	0.000727571
7,8-Dihydrobiopterin	7,8-Dihydrobiopterin	119055	HMDB0000038	240.109	0.000218484	0.000109766	0.000149827	0.000111631	5.43395e-05	0.000117684	9.13243e-05	5.36509e-05	0.000271419	0.000167884	0.000103102	0.000103307	N.D.	4.85772e-05	7.14358e-05	4.43101e-05	5.58552e-05	9.55152e-05	0.00013965	0.000141637	6.60267e-05	5.14185e-05	7.42527e-05	3.92708e-05	N.D.	N.D.	0.000156991	N.D.	6.07911e-05	N.D.	N.D.	6.01416e-05	5.06771e-05	4.36189e-05	4.66217e-05	5.97855e-05	9.61755e-05	5.04181e-05	0.000128045	6.26353e-05
7,8-Dihydroneopterin	7,8-Dihydroneopterin	65074	HMDB0002275	256.104	0.000252441	0.000118614	0.000165276	0.000164835	0.000139939	6.3289e-05	6.94147e-05	4.58662e-05	6.17048e-05	8.89692e-05	0.00011882	0.000101067	1.53718e-05	4.77381e-05	5.20669e-05	3.71289e-05	4.85122e-05	8.4792e-05	6.25526e-05	4.90117e-05	0.000109641	0.000167191	0.000159523	5.65387e-05	0.000233528	0.000288445	0.000247392	0.00027137	0.000876147	0.000452159	0.000200307	0.000344049	0.000109099	0.00016106	9.11119e-05	0.00016817	0.000160765	0.000155601	0.000185743	0.000205417
7-Methylguanine	7-Methylguanine	11361	HMDB0000897	166.072	0.000556733	0.000184694	0.000258565	0.000219675	0.000389177	0.000384927	0.000674691	0.00042006	0.000646103	0.000379047	0.000395751	0.000399507	0.00100852	0.000361369	0.000505191	0.000414098	0.00021057	0.000182582	0.00020334	0.000197071	0.000808597	0.000777846	0.000725764	0.000904493	0.00216641	0.00130615	0.00109764	0.00107096	0.00110479	0.000989824	0.000692562	0.000933412	0.00105069	0.00096937	0.00185169	0.00161265	0.000305567	0.000358035	0.000329146	0.000376864
Acetoacetamide	Acetoacetamide	80077		102.055	N.D.	N.D.	N.D.	0.000238647	N.D.	N.D.	0.000224834	N.D.	N.D.	N.D.	0.000257168	N.D.	N.D.	N.D.	N.D.	N.D.	N.D.	N.D.	N.D.	N.D.	N.D.	N.D.	N.D.	N.D.	N.D.	N.D.	N.D.	N.D.	N.D.	N.D.	N.D.	N.D.	0.00018162	N.D.	N.D.	0.000195042	N.D.	N.D.	N.D.	N.D.
Acetoacetic acid	Acetoacetic acid	96	HMDB0000060	101.024	N.D.	N.D.	N.D.	N.D.	N.D.	N.D.	2.6074e-05	N.D.	N.D.	N.D.	N.D.	0.000118596	N.D.	N.D.	N.D.	N.D.	N.D.	N.D.	N.D.	N.D.	N.D.	N.D.	N.D.	N.D.	N.D.	N.D.	N.D.	N.D.	N.D.	N.D.	N.D.	N.D.	N.D.	N.D.	2.51151e-05	N.D.	N.D.	N.D.	N.D.	N.D.
Acetyl CoA_divalent	AcCoA	444493		403.555	0.000220618	1.45127e-05	8.01012e-05	7.63986e-05	N.D.	3.3002e-05	9.92373e-05	5.56882e-05	0.000610891	0.000417675	0.00035899	0.000207712	0.000148033	0.000237374	0.000246274	0.000339551	0.000453364	0.000549498	0.000553543	0.00045444	N.D.	4.0491e-05	2.51866e-05	3.71085e-05	5.21618e-05	N.D.	9.08345e-05	6.81261e-05	1.21336e-05	N.D.	0.000150974	4.19608e-05	2.20092e-05	0.000155459	1.73174e-05	5.35855e-06	0.000183585	0.00010898	3.67867e-05	0.000264334
Acetylcholine	Acetylcholine	187	HMDB0000895	146.118	0.001918	0.00132321	0.00134517	0.000982668	0.00132969	0.00198196	0.00128685	0.00150221	0.00305921	0.00250113	0.00251708	0.00209552	0.00137681	0.00091927	0.00103428	0.00105645	0.00143906	0.00199489	0.00145979	0.00176242	N.D.	N.D.	N.D.	7.41335e-05	N.D.	N.D.	0.00136493	0.000431165	N.D.	N.D.	N.D.	0.000710724	5.71096e-05	0.000244552	N.D.	9.8335e-05	0.000588999	0.000331151	0.000397894	0.000439978
Adenine	Adenine	190	HMDB0000034	136.062	0.00340971	0.00037444	0.000791678	0.000412929	0.000617713	0.000281227	0.000315663	0.000263692	0.000716103	0.000348143	0.000217112	0.000161239	0.000801617	0.00144894	0.000750026	0.00154311	0.00272387	0.00438991	0.00278059	0.00264838	0.000629666	0.000455819	0.000495211	0.000764633	0.00176748	0.00331712	0.00307114	0.00311358	0.00254275	0.0130967	0.00227153	0.00559553	0.0014798	0.00152625	0.00294696	0.00349261	0.0026115	0.00243316	0.00121547	0.00139946
Adenosine	Adenosine	60961	HMDB0000050	268.104	0.0482985	0.022839	0.0873687	0.0599825	0.0308659	0.0487598	0.0252483	0.0501984	0.0199709	0.0266014	0.0192665	0.0195105	0.0437733	0.0337571	0.0456235	0.0570743	0.0437642	0.0568138	0.0599054	0.0668195	0.052802	0.0251041	0.0428504	0.154653	0.0317206	0.0313929	0.0576865	0.067297	0.0344266	0.0848965	0.0214962	0.140189	0.0595917	0.0627025	0.0677446	0.183601	0.140812	0.153309	0.143519	0.245328
Adenosine 5'-phosphosulfate	Adenosine 5'-phosphosulfate	10238	HMDB0001003	426.012	N.D.	N.D.	N.D.	N.D.	N.D.	N.D.	N.D.	N.D.	N.D.	N.D.	N.D.	N.D.	N.D.	6.83073e-06	N.D.	7.0694e-06	N.D.	4.65896e-06	1.13985e-05	N.D.	8.809e-06	N.D.	6.60966e-06	1.48178e-05	1.81743e-05	8.89821e-06	3.97615e-05	4.61595e-05	7.34403e-06	8.20252e-06	1.88126e-05	2.76612e-05	N.D.	N.D.	N.D.	6.62791e-06	3.82984e-05	4.2698e-05	2.34644e-05	4.94083e-05
Adenylosuccinic acid	Succinyl AMP	447145	HMDB0000536	462.066	0.00882501	0.0046411	0.00820119	0.00457004	0.00547421	0.0057918	0.00264434	0.00394733	0.00155131	0.000958642	0.00113082	0.00153535	0.0054234	0.00790436	0.00558404	0.00825266	0.0092137	0.0102379	0.00996021	0.00858053	0.00264438	0.00171785	0.00403158	0.00386313	0.00975401	0.00826469	0.00796862	0.0100535	0.00648563	0.011206	0.00577737	0.0110232	0.0169399	0.0141677	0.0248053	0.0186131	0.0095342	0.0102591	0.0125321	0.0096032
Adipic acid	Adipic acid	196	HMDB0000448	145.05	N.D.	0.000139033	N.D.	N.D.	0.000180795	9.48118e-05	N.D.	N.D.	N.D.	0.000115835	0.000117876	9.2598e-05	0.000255865	0.000131075	0.000115219	N.D.	N.D.	0.000197316	N.D.	N.D.	N.D.	0.000216404	N.D.	N.D.	0.000274133	0.000181144	0.000110394	0.000112631	N.D.	N.D.	7.98763e-05	N.D.	0.000141849	0.000157028	0.000156578	0.000115109	N.D.	0.00024704	9.90381e-05	N.D.
ADMA	ADMA	123831	HMDB0001539	203.15	0.0777034	0.0247626	0.0392843	0.0439137	0.0225072	0.0263291	0.0202362	0.026028	0.0242771	0.0200972	0.0226722	0.0169524	0.0101841	0.0102673	0.00739985	0.00712261	0.00738605	0.00654701	0.00567787	0.00618064	0.0171425	0.0249919	0.0168296	0.0120265	0.0162663	0.0107718	0.00973104	0.0115703	0.0142405	0.0127114	0.0136351	0.0105029	0.00781764	0.00761694	0.00839815	0.0056757	0.00559897	0.00478605	0.00652954	0.00539527
ADP	ADP	6022	HMDB0001341	426.021	0.0568723	0.0210171	0.0262598	N.D.	0.0291317	0.0242837	0.00892842	0.0141265	0.0356623	0.00800766	0.00269349	0.00550131	0.0312054	0.0242801	0.0250209	0.0409646	0.038526	0.045465	0.0525273	0.0515492	0.0188333	0.0133132	0.0189048	0.0166338	0.0483181	0.0443941	0.0524824	0.0385827	0.023046	0.031486	0.0341785	0.0293907	0.0377146	0.0349114	0.0509688	0.0462577	0.0470092	0.0413041	0.0428606	0.0457623
ADP-glucose GDP-fucose	ADP-Glc GDP-fucose	16500 10918995	HMDB0006557 HMDB0001095	588.073	0.00538394	0.00185439	0.00195286	0.00233006	0.00231665	0.00221095	0.00207742	0.00210112	0.00223142	0.00214105	0.00228983	0.00211776	0.00242559	0.0027689	0.00257523	0.00261548	0.00339269	0.00264279	0.00277261	0.00260858	0.00274878	0.00181693	0.00309052	0.00291969	0.00333736	0.00317837	0.00420847	0.00430049	0.00332673	0.003485	0.00187789	0.00413725	0.00402527	0.00322465	0.00392994	0.00386094	0.00367171	0.00343425	0.0035488	0.00359749
ADP-ribose	ADP-Rib	445794	HMDB0001178	558.064	0.00028812	4.80597e-05	8.3845e-05	4.12239e-05	0.00013392	0.000186913	0.000194	9.79005e-05	0.000370511	0.000319681	0.000170659	0.000318131	0.00046144	0.000416406	0.000485745	0.00141806	0.0223456	0.0170444	0.0236016	0.0172098	0.000111458	4.48686e-05	0.000164009	8.73006e-05	0.0142385	0.00366055	0.00573277	0.000979648	0.000196135	7.52974e-05	0.000404965	0.000237894	9.1057e-05	0.000301666	0.00014321	0.000390037	0.00420947	0.00656464	0.00720857	0.00747345
Agmatine	Agmatine	199	HMDB0001432	131.129	N.D.	N.D.	N.D.	N.D.	1.13539e-05	N.D.	3.67243e-05	N.D.	N.D.	N.D.	N.D.	N.D.	N.D.	2.04367e-05	N.D.	1.2897e-05	N.D.	N.D.	N.D.	N.D.	N.D.	1.18993e-05	N.D.	N.D.	8.99893e-05	2.5615e-05	3.50297e-05	1.4068e-05	N.D.	N.D.	N.D.	N.D.	5.93681e-06	1.39236e-05	1.63371e-05	1.07541e-05	N.D.	N.D.	N.D.	N.D.
Ala	Ala	602	HMDB0000161,HMDB0001310	90.055	1.34374	0.474697	0.724492	0.679397	0.825029	0.769725	0.5009	0.790358	0.906633	0.430933	0.506354	0.441441	0.522181	0.349738	0.373186	0.35351	0.530992	0.426871	0.448664	0.490424	0.458445	0.51497	0.483118	0.489427	0.786884	0.548292	0.554424	0.650894	0.425461	0.473623	0.32059	0.423246	0.537076	0.494504	0.66236	0.650702	0.470253	0.397174	0.466453	0.358614
Albendazole	Albendazole	2082		266.097	N.D.	N.D.	N.D.	N.D.	N.D.	N.D.	N.D.	N.D.	N.D.	N.D.	N.D.	N.D.	N.D.	N.D.	N.D.	N.D.	N.D.	N.D.	N.D.	N.D.	N.D.	N.D.	N.D.	N.D.	N.D.	N.D.	N.D.	N.D.	N.D.	N.D.	N.D.	N.D.	1.86723e-05	1.43319e-05	N.D.	N.D.	N.D.	N.D.	N.D.	N.D.
Allantoic acid	Allantoic acid	203	HMDB0001209	175.047	2.25602e-05	8.22595e-05	7.17611e-05	0.000123962	3.32273e-05	7.01336e-05	5.5713e-05	6.26332e-05	4.90836e-05	2.52991e-05	5.41738e-05	6.96077e-05	4.9114e-05	8.94918e-05	7.36952e-05	7.90384e-05	4.57874e-05	6.5668e-05	5.81343e-05	5.17999e-05	5.30545e-05	1.57836e-05	4.70636e-05	5.66012e-05	N.D.	2.85693e-05	5.68676e-05	7.97278e-05	5.29626e-05	2.06657e-05	N.D.	7.48671e-05	6.33091e-05	3.11574e-05	2.75138e-05	5.05061e-05	6.19198e-05	7.39019e-05	5.38959e-05	7.61107e-05
Allantoin	Allantoin	204	HMDB0000462	159.051	0.000459988	0.000159379	0.000336574	0.000240118	N.D.	N.D.	6.68728e-05	N.D.	N.D.	5.45878e-05	9.6353e-05	N.D.	N.D.	N.D.	N.D.	N.D.	N.D.	N.D.	N.D.	N.D.	N.D.	N.D.	N.D.	N.D.	N.D.	N.D.	N.D.	N.D.	N.D.	6.1426e-05	N.D.	3.76476e-05	N.D.	N.D.	N.D.	N.D.	N.D.	N.D.	N.D.	N.D.
Alloisoleucine	Alloisoleucine	99288	HMDB0000557	132.102	0.00924732	0.00369792	0.00351777	0.00581133	0.00345743	0.00529664	0.00882772	0.00332357	0.0044072	0.00410764	0.00447388	0.00396668	0.00619777	0.00284936	0.00649806	0.00783817	0.00464222	0.00614591	0.00864526	0.00403667	0.00294823	0.00596165	0.00371646	0.00276299	0.00631276	0.00664596	0.0048883	0.00459509	0.00461584	0.00477734	0.00470008	0.0054292	0.00577177	0.00733316	0.00827582	0.00979679	0.00690087	0.00463154	0.00569425	0.00485005
Aminophylline	Aminophylline	2153	HMDB0001889	181.072	0.000177113	6.31163e-05	0.000138805	0.000106597	7.5155e-05	7.28093e-05	7.15732e-05	N.D.	N.D.	N.D.	7.33392e-05	N.D.	0.000504963	0.000420833	0.000465176	0.000427649	N.D.	N.D.	N.D.	N.D.	0.000110718	0.000117736	0.000137945	0.000100702	N.D.	5.30471e-05	8.0135e-05	N.D.	N.D.	6.18201e-05	N.D.	5.72746e-05	0.000554091	0.000522887	0.000635694	0.000663955	N.D.	6.15113e-05	N.D.	4.1233e-05
AMP	AMP	6083	HMDB0000045	346.055	0.199179	0.081683	0.0745857	0.0515654	0.0583066	0.0393579	0.00359088	0.015906	0.015988	0.00804157	0.000455976	0.00109566	0.0519335	0.0616769	0.0340918	0.0859894	0.149018	0.134413	0.146207	0.120109	0.0428164	0.0292438	0.0687265	0.0447366	0.254854	0.269842	0.311351	0.221002	0.120054	0.166882	0.105912	0.134278	0.158937	0.153373	0.215869	0.186387	0.211619	0.202596	0.196466	0.136988
Anserine_divalent	Anserine	112072		121.068	N.D.	8.33138e-05	7.19288e-05	7.03438e-05	8.06045e-05	1.68143e-05	3.51438e-05	2.23054e-05	0.000196229	7.02447e-05	2.22198e-05	0.000108931	1.98314e-05	4.22894e-05	2.7572e-05	3.68988e-05	6.30522e-05	9.12477e-05	8.94797e-05	8.67303e-05	N.D.	6.49411e-05	0.000100035	4.65842e-05	0.000152973	0.000356173	8.67749e-05	0.000197087	0.000161988	0.00017257	9.5339e-05	0.000162491	2.40684e-05	2.5933e-05	3.44754e-05	N.D.	4.3104e-05	1.86077e-05	1.40772e-05	2.20042e-05
Anthranilic acid	Anthranilic acid	227	HMDB0001123	138.055	N.D.	N.D.	N.D.	N.D.	N.D.	N.D.	N.D.	N.D.	N.D.	N.D.	N.D.	N.D.	N.D.	N.D.	N.D.	N.D.	N.D.	N.D.	N.D.	N.D.	N.D.	0.000158102	0.00021498	N.D.	N.D.	N.D.	0.000173815	N.D.	0.00027105	0.000156275	N.D.	0.000145558	N.D.	N.D.	N.D.	N.D.	N.D.	N.D.	N.D.	N.D.
Arg	Arg	6322	HMDB0000517,HMDB0003416	175.119	1.46413	0.504316	0.666679	0.628665	0.601749	0.624982	0.575888	0.566716	1.20903	0.642126	0.621848	0.616269	0.549922	0.392532	0.358968	0.306361	0.42108	0.408671	0.383195	0.384448	0.375151	0.534603	0.509762	0.294606	0.538362	0.435664	0.341678	0.343163	0.346577	0.31595	0.296462	0.319169	0.268159	0.296954	0.289538	0.253075	0.286566	0.256155	0.292161	0.237778
Arg-Glu	Arg-Glu			304.162	0.00136542	0.000668096	0.00164204	0.00130591	0.0021133	0.001799	0.00172732	0.0017522	0.00223886	0.00139264	0.00097029	0.000726657	0.00234154	0.00184087	0.00146158	0.0014709	0.00184823	0.00166914	0.00143065	0.00157131	0.0011128	0.00110714	0.0013899	0.000505314	0.00175578	0.00227885	0.00186019	0.00157626	0.000863752	0.00128838	0.000456794	0.000826956	0.00150855	0.00132713	0.0012014	0.00114355	0.00151661	0.00140826	0.00135371	0.00114319
Arginine ethyl ester	Arginine ethyl ester	439495		203.15	N.D.	N.D.	N.D.	N.D.	2.09396e-05	2.92957e-05	2.39147e-05	2.49003e-05	N.D.	N.D.	N.D.	N.D.	N.D.	N.D.	N.D.	N.D.	N.D.	N.D.	N.D.	N.D.	N.D.	N.D.	N.D.	N.D.	N.D.	N.D.	8.07541e-06	N.D.	N.D.	N.D.	N.D.	N.D.	N.D.	N.D.	N.D.	N.D.	N.D.	N.D.	N.D.	N.D.
Argininosuccinic acid	ArgSuccinate	16950	HMDB0000052	291.13	0.0695277	0.0260649	0.0553381	0.0456824	0.0498414	0.0583832	0.0417741	0.0622507	0.0719323	0.0456751	0.0536662	0.044117	0.0470018	0.0269167	0.0306348	0.0211613	0.0165684	0.0159175	0.0148129	0.0127055	0.0197485	0.0242651	0.0250125	0.0163088	0.0182848	0.0121381	0.0101554	0.0126733	0.00912639	0.0115847	0.013719	0.0142513	0.0235444	0.0219156	0.0383041	0.0261204	0.0098794	0.00974582	0.0142311	0.0102637
Ascorbate 2-glucoside	Ascorbate 2-glucoside	54693473		337.077	7.74488e-05	4.92544e-05	4.81937e-05	6.59727e-05	6.85034e-05	6.20974e-05	6.24102e-05	4.38654e-05	0.000113515	7.22732e-05	9.61537e-05	6.36582e-05	0.000232861	0.000212764	0.000232908	0.000224642	9.13198e-05	8.98361e-05	8.47383e-05	9.14295e-05	4.2179e-05	4.98489e-05	5.75667e-05	4.76523e-05	0.000115962	0.000112358	0.000110112	0.00012768	4.88387e-05	4.93745e-05	2.16331e-05	7.68429e-05	0.000176133	0.000147904	0.000122901	0.000100423	6.05299e-05	7.12949e-05	5.9672e-05	9.00145e-05
Ascorbate 2-phosphate	Ascorbate 2-phosphate	131711663		254.991	0.000310521	0.000157466	0.000229625	0.000183716	0.000273815	0.000278628	0.000195135	0.000239804	0.00015288	0.000108988	9.71976e-05	0.000110759	0.000121557	0.000106984	0.000127945	9.88406e-05	9.80306e-05	0.000124385	0.000121816	0.000111161	0.000164603	0.000114464	0.000145465	0.000145031	0.000175451	0.000162043	0.000299297	0.000241918	0.000135798	0.000171669	0.000124798	0.000160724	0.000212691	0.000252076	0.000230696	0.000230754	0.000123975	0.000164521	0.000194856	0.000154907
Ascorbate 2-sulfate	Ascorbate 2-sulfate	54676864		254.981	0.00595944	0.00244032	0.00312611	0.00267154	0.00537459	0.00552799	0.00448657	0.00418367	0.0120416	0.00650402	0.00556233	0.005956	0.00537483	0.00434376	0.00448017	0.00398458	0.00624529	0.00623818	0.00528559	0.00565769	0.00314463	0.00260201	0.0031488	0.00265955	0.00272925	0.0019441	0.00750898	0.00307442	0.00226023	0.0018681	0.00247797	0.00647695	0.00272667	0.00334862	0.00193353	0.00212434	0.00360865	0.00372121	0.00352751	0.00373532
Ascorbic acid	Ascorbic acid	54670067	HMDB0000044	175.024	0.0221646	0.0444944	0.0770173	0.0717746	0.0245766	0.0661814	0.0436603	0.0542173	0.0316909	0.0221065	0.0603284	0.0416285	0.0325854	0.0529642	0.0557968	0.0470876	0.0398694	0.05407	0.0454161	0.0425286	0.0319345	0.0188112	0.0457017	0.0445279	0.032095	0.0246376	0.0340859	0.0642534	0.0435409	0.0234104	0.00314344	0.0722041	0.0485951	0.0318488	0.0288201	0.0482932	0.0608696	0.0454115	0.0515802	0.05389
Asn	Asn	236	HMDB0000168,HMDB0033780	133.061	0.319761	0.107493	0.151786	0.150274	0.120228	0.140596	0.0996566	0.122537	0.190682	0.123125	0.127	0.114511	0.106915	0.0677127	0.0768126	0.0598424	0.0838577	0.0767041	0.0720174	0.0731429	0.0839518	0.103463	0.0974116	0.0762545	0.140816	0.115027	0.0947447	0.10746	0.103739	0.102603	0.10092	0.102493	0.100365	0.0894529	0.118975	0.0964331	0.0620379	0.0707017	0.0736136	0.0533055
Asp	Asp	424	HMDB0000191,HMDB0006483	134.045	0.466314	0.205421	0.3183	0.258231	0.256025	0.275969	0.211302	0.255761	0.327442	0.293817	0.278499	0.233607	0.169285	0.150024	0.141777	0.144566	0.176746	0.180513	0.160589	0.189986	0.156278	0.194896	0.183997	0.182538	0.520943	0.288488	0.244835	0.297998	0.189248	0.187128	0.147731	0.196525	0.177721	0.179769	0.236502	0.228848	0.142211	0.157739	0.153076	0.147034
Aspartame	Aspartame	134601	HMDB0001894	295.129	0.00154239	0.000631122	0.00053944	0.000410985	0.000661598	0.000625079	0.000376113	0.00042861	0.00131002	0.000394496	0.000278058	0.000214898	0.0024399	0.000859606	0.00076046	0.000638996	0.00121402	0.000736851	0.000725569	0.00082369	0.000465965	0.00040975	0.000470001	0.000305401	0.00304833	0.00321209	0.00225219	0.00181234	0.0013988	0.00134633	0.000351781	0.000580132	0.0016604	0.0013308	0.00156315	0.00187924	0.00162999	0.00142014	0.000976291	0.000790707
ATP	ATP	5957	HMDB0000538	505.988	0.0101916	0.00706521	0.00982547	0.00903564	0.0107129	0.019665	0.0305131	0.0206229	0.00961171	0.0176915	0.0345276	0.0336128	0.0129882	0.0178809	0.0197724	0.0188837	0.0141239	0.0175969	0.0194017	0.020008	0.0112882	0.00584637	0.00724695	0.00841074	0.00935651	0.01623	0.0183357	0.0143264	0.00695516	0.0104592	0.0149199	0.0119526	0.0125286	0.0119218	0.0110603	0.0120407	0.0138553	0.010539	0.00994117	0.0152708
Atropine	Atropine	174174	HMDB0014712	290.175	N.D.	N.D.	N.D.	N.D.	N.D.	N.D.	N.D.	N.D.	N.D.	N.D.	N.D.	N.D.	9.9831e-05	6.95174e-05	5.27858e-05	8.20748e-05	N.D.	N.D.	N.D.	N.D.	N.D.	N.D.	N.D.	N.D.	N.D.	N.D.	N.D.	N.D.	N.D.	N.D.	N.D.	N.D.	5.93852e-05	7.45058e-05	7.44446e-05	9.06016e-05	N.D.	N.D.	N.D.	N.D.
Azelaic acid	Azelaic acid	2266	HMDB0000784	187.097	0.00170294	0.000613155	0.000234786	0.000222657	0.000776652	0.000854748	0.000647895	0.000420607	0.00392828	0.00421927	0.00843244	0.00327746	0.00115827	0.000595164	0.000476533	0.000567281	0.000708404	0.00085711	0.000307613	0.000482412	0.000187779	0.00231106	0.000192428	0.000151967	0.0036056	0.00119047	0.00182803	0.00151894	0.000710893	0.000430953	0.00183642	0.00114497	0.000456558	0.000670639	0.000495531	0.000357981	0.00203039	0.00500522	0.00143125	0.00123631
Benzoic acid	Benzoic acid	243	HMDB0001870	121.029	0.00262411	0.000327349	N.D.	N.D.	0.000637905	N.D.	N.D.	N.D.	N.D.	N.D.	0.000280177	N.D.	N.D.	0.000284585	N.D.	N.D.	N.D.	N.D.	N.D.	N.D.	N.D.	0.000630404	N.D.	N.D.	N.D.	N.D.	0.000478369	N.D.	N.D.	N.D.	N.D.	N.D.	N.D.	0.000457752	N.D.	N.D.	N.D.	N.D.	N.D.	N.D.
Betaine	Betaine	247	HMDB0000043	118.086	0.399047	0.141911	0.186643	0.1623	0.184278	0.22637	0.146678	0.186645	0.314924	0.18041	0.175796	0.177989	0.184275	0.12578	0.143875	0.128026	0.200389	0.193999	0.19086	0.210134	0.232156	0.232961	0.281443	0.226654	0.235301	0.198096	0.217418	0.230253	0.242159	0.232738	0.225668	0.307601	0.12829	0.160158	0.111434	0.121687	0.239706	0.244734	0.243691	0.234726
Betaine aldehyde_+H2O	BTL	249		120.102	0.156154	0.0366603	0.069057	0.0621875	0.0476195	0.0473121	0.0433003	0.0511584	0.200373	0.0939882	0.076747	0.0677334	0.0396035	0.0159466	0.0235021	0.0100559	0.00783871	0.00986488	0.00730162	0.00834118	0.043131	0.0655678	0.0499741	0.0259801	0.0648212	0.0205475	0.0299856	0.0235321	0.0305528	0.0184284	0.0544671	0.0237526	0.00814734	0.00854432	0.0118463	0.00748555	0.00773958	0.00971034	0.0154314	0.0119548
Betonicine	Betonicine	164642		160.097	N.D.	N.D.	N.D.	N.D.	N.D.	0.000228003	0.000190681	N.D.	N.D.	0.000314229	0.000313321	0.000338673	N.D.	N.D.	N.D.	N.D.	N.D.	N.D.	N.D.	N.D.	N.D.	N.D.	N.D.	N.D.	N.D.	N.D.	0.000264447	N.D.	N.D.	0.000275117	0.000360468	0.000311505	N.D.	N.D.	N.D.	N.D.	N.D.	N.D.	N.D.	N.D.
Butyric acid Isobutyric acid	Butyric acid Isobutyric acid	264 6590	HMDB0000039 HMDB0001873	87.045	N.D.	N.D.	N.D.	N.D.	N.D.	0.000102912	0.00130605	N.D.	N.D.	7.66524e-05	N.D.	N.D.	0.00195223	0.000267613	0.00116313	0.000267355	N.D.	7.87715e-05	N.D.	N.D.	0.000253704	0.00022716	0.000279161	0.000294753	0.00183211	0.00134801	0.00055438	0.000674175	0.000174181	0.000201213	0.00014555	0.000190482	0.00499056	0.00367092	0.00754353	0.00793238	0.000105775	0.000113335	9.90326e-05	9.45142e-05
Butyrylcarnitine	Butyrylcarnitine	439829	HMDB0002013	232.154	N.D.	0.000147937	N.D.	N.D.	0.00128683	0.00150762	0.00566427	0.00113829	0.00100975	0.00100823	0.0010076	0.00137921	0.0133681	0.00243939	0.00804363	0.00752223	0.00502241	0.00728876	0.00744589	0.00559279	0.00422646	0.00308785	0.00443504	0.0042095	0.0346439	0.0634658	0.0162099	0.0267662	0.0102182	0.00754842	0.00472077	0.00803507	0.0171705	0.0160342	0.0121423	0.0165509	0.0157475	0.0120075	0.00817813	0.0094727
Cadaverine	Cadaverine	273	HMDB0002322	103.123	0.00190709	0.000470851	0.000764687	0.0005151	0.000259072	0.000185251	0.000566075	0.000164543	N.D.	N.D.	N.D.	N.D.	6.27349e-05	3.8802e-05	2.24862e-05	2.89426e-05	1.81699e-05	1.20614e-05	N.D.	N.D.	0.00302797	0.0026817	0.00172149	0.00207553	0.0051169	0.00131475	0.00175998	0.000705878	N.D.	N.D.	N.D.	N.D.	0.00052408	0.000485154	0.00102902	0.000472414	N.D.	1.04327e-05	1.33119e-05	N.D.
Caffeine	Caffeine	2519	HMDB0001847	195.088	0.00232036	0.000879177	0.00125565	0.00104251	0.000317465	0.00070687	0.000192674	0.000186251	0.000205179	0.000265068	0.000305359	0.000275042	0.00672526	0.00631255	0.00592222	0.00671075	0.000430685	0.000354836	0.000408674	0.00039122	0.00113381	0.00130452	0.00132341	0.00117075	0.00031747	0.00020428	0.000186231	0.000231793	0.000287346	0.000206917	0.000311317	0.000215607	0.00581043	0.00639364	0.00650327	0.00696182	0.000448553	0.000535964	0.000461276	0.000425067
cAMP	cAMP	6076	HMDB0000058	328.045	0.000336135	0.000155776	0.000218775	0.000180893	0.000257447	0.000266075	0.000188937	0.000214302	0.000287838	0.000211447	0.000178828	0.000217751	0.000242768	0.000175566	0.000185809	0.000177474	0.000264262	0.000245453	0.000246813	0.000240719	0.000114893	8.95012e-05	0.00011123	0.000114266	0.000243445	0.000196946	0.000302486	0.000215122	0.000187544	0.00022636	0.000124981	0.000217828	0.000201035	0.000166121	0.000213951	0.000216881	0.000178032	0.000228161	0.000194691	0.000200095
Carboxymethyllysine	Carboxymethyllysine	123800		205.118	0.00032568	0.000159074	0.000145685	0.000121072	0.00085811	0.00105809	0.00105578	0.000785473	0.000561269	0.000333805	0.000306653	0.000326496	0.000560012	0.000344687	0.000391967	0.000438099	0.000246368	0.00027028	0.000270498	0.000211842	0.000138478	0.000163843	0.000195581	0.000113756	0.000991181	0.000692441	0.00115146	0.00162549	0.000162343	0.00013371	0.000179808	0.000235163	0.000420771	0.000512775	0.000740892	0.000723559	0.000224535	0.000316513	0.000219088	0.000153293
Carnitine	Carnitine	85	HMDB0000062	162.112	0.57482	0.205408	0.285878	0.234707	0.240569	0.248407	0.201375	0.205496	0.525132	0.299564	0.267587	0.310387	0.342301	0.201507	0.250528	0.221672	0.446561	0.411476	0.357648	0.423368	0.187033	0.226537	0.231087	0.213674	0.333556	0.390774	0.270591	0.268395	0.23657	0.282175	0.212379	0.286098	0.205825	0.227608	0.307246	0.262877	0.371997	0.309003	0.320204	0.300376
Carnosine	Carnosine	439224	HMDB0000033	227.114	0.000269276	0.000154247	0.000217841	0.000182069	0.000402526	0.000419601	0.000313363	0.000321676	0.000461152	0.000503067	0.000472979	0.000414441	0.000766629	0.000419181	0.000585575	0.000446812	0.00031621	0.000296758	0.000335442	0.000298105	8.9805e-05	8.68512e-05	6.98455e-05	8.16858e-05	0.000551812	0.000414465	0.000522432	0.000323067	0.000160649	0.000193048	0.000154443	0.000189234	0.000219167	0.000167619	0.000165569	0.000141944	0.000258565	0.000435512	0.000393225	0.000401561
cCMP 2',3'-cCMP	cCMP 2',3'-cCMP	19236 68934	HMDB0011691	304.033	0.00042941	0.000202398	0.000551345	0.000383506	0.000465323	0.000354255	0.000540976	0.000342828	0.000537087	0.000348564	0.000509349	0.0004478	0.000360916	0.000230545	0.000346926	0.000375666	0.000382949	0.000357637	0.000597246	0.000461908	0.000866959	0.000328876	0.00082309	0.00133622	0.000412476	0.000361874	0.0010394	0.00112034	0.000360587	0.000463175	0.000443111	0.00109963	0.00072223	0.000533947	0.000270967	0.000942792	0.00067763	0.000632926	0.00062432	0.00133058
CDP	CDP	6132	HMDB0001546	402.01	0.000228308	0.000116983	0.000170663	0.000138363	0.000802	0.000523028	0.000122633	0.000265433	0.000860682	0.000268367	9.80266e-06	3.34925e-05	0.000297023	0.000231854	0.000271194	0.000188101	0.000173479	0.000194908	0.000161269	0.0001815	0.000394232	0.000369877	0.000299876	0.000240348	0.000927989	0.000553558	0.00141676	0.000675752	0.000536009	0.000495953	0.000654011	0.000457087	0.000375091	0.000385297	0.000462334	0.000305387	0.000250473	0.000249437	0.000294981	0.000221467
CDP-choline	CDP-choline	13804	HMDB0001413	487.1	0.018713	0.00703772	0.0103437	0.00767033	0.00885756	0.013105	0.0094193	0.00778256	0.0202181	0.0113686	0.0110655	0.0111527	0.0176443	0.00701139	0.0123403	0.00724213	0.013149	0.0167569	0.0151422	0.0156507	0.00908842	0.00990064	0.0138229	0.0103938	0.0206726	0.0259149	0.0186837	0.0145785	0.0107363	0.0169796	0.0075167	0.0144203	0.0161132	0.0167084	0.0193376	0.0186307	0.0237348	0.0172736	0.0173584	0.0140756
cGMP	cGMP	24316	HMDB0001314	344.04	5.09993e-05	1.7074e-05	3.567e-05	2.23812e-05	3.43357e-05	1.91512e-05	1.87927e-05	1.18041e-05	2.62478e-05	1.7958e-05	N.D.	1.10712e-05	2.91734e-05	1.34858e-05	8.99159e-06	9.27493e-06	1.50718e-05	9.87348e-06	1.27886e-05	5.9265e-06	2.42025e-05	1.8821e-05	1.50116e-05	2.19565e-05	8.51135e-06	8.3485e-06	1.56889e-05	2.82712e-05	1.54743e-05	2.28718e-05	1.29195e-05	2.59714e-05	2.82007e-05	1.67404e-05	5.95589e-06	1.50605e-05	1.44504e-05	1.61084e-05	1.4623e-05	1.50072e-05
Cholic acid	Cholic acid	221493	HMDB0000619	407.28	0.000563697	8.99737e-05	0.000196423	0.000235273	0.00113475	0.00201254	0.0187216	0.00252934	N.D.	N.D.	N.D.	N.D.	0.00242422	0.000945755	0.00161859	0.00125143	0.000146292	0.000190411	0.000339811	0.0003359	0.000608142	0.000417089	0.000497972	0.000540799	0.0227158	0.00423967	0.00786797	0.00773364	N.D.	N.D.	N.D.	N.D.	0.00179844	0.00187128	0.00408649	0.0035456	0.000163119	0.000276899	0.000307711	0.000278963
Choline	Choline	305	HMDB0000097	104.107	1.76337	0.559601	0.806198	0.68531	0.744149	0.729314	0.807373	0.665446	1.36163	0.890915	0.791156	0.827132	0.72781	0.400863	0.523199	0.455047	0.444871	0.394809	0.411	0.430893	0.608581	0.631967	0.692566	0.532245	1.52322	1.07939	0.98744	1.00738	0.921224	0.73531	0.727213	0.789948	0.472051	0.472724	0.477946	0.459445	0.772299	0.726796	0.784679	0.683405
cis-Aconitic acid	cis-Aconitic acid	643757	HMDB0000072	173.009	N.D.	N.D.	N.D.	0.000117427	0.000463211	N.D.	0.000560345	0.000431008	N.D.	0.000715009	0.000961329	0.000674409	N.D.	0.000324086	0.000516608	0.000449573	N.D.	N.D.	0.000234823	0.000244052	0.000462551	0.000399483	0.000560081	0.000351399	0.00167194	0.00059918	0.0015225	0.00143764	0.00100289	0.000974599	0.00103579	0.000931603	0.00041121	0.00048084	0.000470207	0.000641021	0.00050391	0.000675451	0.000688729	0.00065629
Citraconic acid	Citraconic acid	643798	HMDB0000634	129.019	N.D.	N.D.	N.D.	N.D.	N.D.	N.D.	4.30996e-05	N.D.	N.D.	3.82599e-05	2.64149e-05	N.D.	N.D.	6.88902e-05	7.77335e-05	5.79383e-05	N.D.	3.83653e-05	4.05796e-05	N.D.	N.D.	N.D.	N.D.	3.52258e-05	N.D.	N.D.	5.55984e-05	4.1044e-05	6.05928e-05	7.66585e-05	6.64089e-05	5.66337e-05	0.000192595	0.000200804	0.000247418	0.000245493	6.27257e-05	5.62201e-05	4.03507e-05	N.D.
Citramalic acid	Citramalic acid	1081	HMDB0000426	147.029	N.D.	0.000122405	N.D.	N.D.	N.D.	4.77912e-05	N.D.	N.D.	0.000330283	N.D.	6.86601e-05	6.16563e-05	0.000248714	9.69e-05	9.87311e-05	8.16448e-05	0.000179353	N.D.	0.000149895	0.000134749	N.D.	0.000125537	N.D.	N.D.	0.000288048	N.D.	0.000117533	N.D.	N.D.	N.D.	N.D.	N.D.	0.000103362	0.000137751	N.D.	N.D.	0.000103332	N.D.	N.D.	N.D.
Citric acid	Citric acid	311	HMDB0000094	191.019	0.012322	0.00514923	0.00618263	0.00494429	0.0219342	0.0141708	0.0231452	0.0164362	0.0553489	0.0417859	0.0400843	0.0355514	0.0236843	0.0164457	0.0263267	0.0242531	0.0103872	0.0126481	0.0149168	0.0126073	0.0198283	0.0150311	0.0231053	0.0159604	0.055813	0.0196184	0.0477504	0.0460243	0.032213	0.0320423	0.0361662	0.0368901	0.018141	0.0261315	0.0224014	0.0306332	0.0232709	0.0299916	0.0310173	0.0301498
Citrulline	Citrulline	9750	HMDB0000904	176.103	0.0779185	0.023116	0.0305483	0.033064	0.0337199	0.0454371	0.0723051	0.0375609	0.0839498	0.0548296	0.057743	0.0472108	0.0368541	0.0286218	0.0340238	0.0239916	0.0152344	0.0156218	0.0142689	0.0173322	0.039448	0.0353336	0.0378666	0.0281786	0.129882	0.0618527	0.063963	0.0778175	0.0264776	0.0274059	0.0310153	0.0264619	0.0302603	0.0379342	0.047755	0.0410731	0.0152398	0.0145537	0.0180496	0.0205012
CMP	CMP	6131	HMDB0000095	322.044	0.00803126	0.00370436	0.0053444	0.00437704	0.00725894	0.00699839	0.00417354	0.00472383	0.00337288	0.00178976	0.00134828	0.00170872	0.00364939	0.00564535	0.00416329	0.00589609	0.00634884	0.00615833	0.00566806	0.00548996	0.00532712	0.00440903	0.00605574	0.00445032	0.0128452	0.00512662	0.0167835	0.0110212	0.00633026	0.00697821	0.00640229	0.00879186	0.00661377	0.00634135	0.00788746	0.0074482	0.00589576	0.00699047	0.00772795	0.00572543
CMP-N-acetylneuraminate	CMP-NeuNAc	448209	HMDB0001176	613.14	0.0059611	0.00280391	0.00405154	0.00328691	0.0050474	0.00525701	0.00356222	0.0046382	0.00534343	0.00399363	0.0035762	0.00386404	0.00227126	0.00266813	0.00255818	0.0026915	0.00343691	0.00326471	0.00326063	0.00333002	0.00288816	0.00233027	0.0024046	0.00263138	0.0039213	0.0039787	0.00703503	0.00559408	0.00576339	0.00868327	0.00651581	0.00743302	0.00516284	0.0046637	0.00715876	0.00593168	0.00487552	0.00504257	0.005525	0.00524739
CoA_divalent	CoA	87642		382.55	0.000129741	0.00143341	0.00082942	0.00258996	0.000255896	0.0030747	0.00208703	0.00417702	N.D.	N.D.	0.000211148	8.14639e-05	0.00216712	0.00286682	0.00319633	0.00420499	0.00347042	0.00354793	0.00417214	0.00371243	0.000334016	4.75134e-05	0.000522563	0.00107971	0.000161606	0.000555563	8.34726e-05	0.0024832	0.00033825	1.85892e-05	7.83843e-05	0.00258929	0.00224779	0.000137948	0.00105073	0.00386296	0.00542156	0.00337142	0.00469784	0.0049309
Creatine	Creatine	586	HMDB0000064	132.077	3.71106	1.43843	1.84588	1.25918	0.970336	1.43563	0.919009	0.888648	3.20963	1.65263	1.88392	1.73696	1.5574	1.21644	1.18583	1.3729	2.00468	1.90057	2.21259	2.08003	1.35223	1.16994	1.51309	1.19483	1.38858	1.38786	0.875653	1.33585	1.03828	1.39075	1.28508	1.49435	0.618742	0.946265	0.733118	0.67938	1.67537	1.43848	1.476	1.14942
Creatinine	Creatinine	588	HMDB0000562	114.066	0.10178	0.0445218	0.0600193	0.0528458	0.100863	0.0844794	0.0878432	0.0901669	0.146733	0.0527047	0.0829906	0.0903416	0.080449	0.0562345	0.0650981	0.068797	0.0432634	0.071899	0.0728789	0.0795541	0.0405926	0.0395	0.0472088	0.0354721	0.106291	0.0856849	0.0938863	0.0808605	0.07689	0.0743427	0.0778886	0.0759253	0.0574086	0.0660085	0.0614645	0.0687881	0.0742228	0.0676918	0.0611892	0.0626736
CTP	CTP	6176	HMDB0000082	481.976	2.47685e-05	2.68737e-05	5.23565e-05	3.49893e-05	0.000167511	0.000345443	0.000292921	0.000257111	0.000173425	0.000357947	0.000100576	0.000191521	7.26197e-05	0.000117875	0.000177183	5.82643e-05	3.92695e-05	5.6272e-05	4.37164e-05	5.66891e-05	0.000197114	0.000102412	7.06147e-05	8.2336e-05	0.000102168	8.58615e-05	0.00027709	0.000132378	7.10365e-05	7.9026e-05	0.000173417	0.000100014	7.34924e-05	8.67005e-05	9.14266e-05	5.71018e-05	5.77688e-05	4.51459e-05	5.00196e-05	5.99837e-05
Cumic acid	Cumic acid	10820		163.076	0.000888014	6.25115e-05	6.46655e-05	3.46044e-05	0.000179449	6.75581e-05	4.86865e-05	3.37427e-05	0.000500863	0.00013715	3.61118e-05	2.74755e-05	0.00038633	6.92597e-05	3.34754e-05	1.55178e-05	0.00029495	0.000180555	3.1255e-05	1.36476e-05	7.07571e-05	0.000158024	4.10595e-05	N.D.	0.000366818	0.000199254	0.000141001	2.72681e-05	0.000101744	9.55187e-05	5.46818e-05	2.35337e-05	0.000189275	0.000131395	6.96223e-05	2.16992e-05	0.000106925	4.51943e-05	6.99949e-05	7.40293e-06
Cys	Cys	594	HMDB0000574,HMDB0003417	122.027	0.0404109	0.00260472	0.000292104	0.0295268	0.000786657	0.0353326	0.00475636	0.0321513	0.00132036	0.000659005	0.00863809	0.00104265	0.0181666	0.0159726	0.0117639	0.0123601	0.0168508	0.0135291	0.0202299	0.0167369	0.0073866	0.00613661	0.0190269	0.0235183	0.00553954	0.00198025	0.000639209	0.0517646	0.00129132	0.000767098	0.00297204	0.00727567	0.0975375	0.000529242	0.00145328	0.0833502	0.0621953	0.00684257	0.0512996	0.0687553
Cys-Gly	Cys-Gly	439498	HMDB0000078	179.049	0.000505398	2.5449e-05	1.07223e-05	0.000428721	3.35137e-05	0.00205767	0.000121768	0.000573572	N.D.	1.60793e-05	0.000343671	3.95585e-05	0.00130636	0.000399683	0.000113936	0.000298115	0.000326672	0.00023189	0.000323203	0.000147803	0.000132319	0.000113865	0.000509069	0.000227846	6.36875e-05	0.000104731	6.95016e-05	0.00125471	6.65543e-05	0.00014942	3.95221e-05	0.000281849	0.00574314	3.06497e-05	0.000130241	0.0049838	0.00405763	0.000165926	0.00355252	0.0023313
Cystathionine	Cystathionine	834	HMDB0000099	223.075	0.00108884	0.000428722	0.00100968	0.000775472	0.000567644	0.000318797	0.000383226	0.000555944	N.D.	0.000268578	N.D.	N.D.	N.D.	0.000245786	0.000363696	0.000248029	N.D.	0.000186338	0.000196655	N.D.	0.000671492	0.000632761	0.000528844	0.00065404	0.00246213	0.00200011	0.00108798	0.00157327	0.000712004	0.00110614	0.000667184	0.000741804	0.00140458	0.000829935	0.00165953	0.00164421	0.0003783	0.000455347	0.000410202	0.000436379
Cysteamine	Cysteamine	6058	HMDB0002991	78.0373	N.D.	N.D.	N.D.	N.D.	N.D.	N.D.	N.D.	N.D.	N.D.	N.D.	N.D.	N.D.	N.D.	N.D.	N.D.	N.D.	N.D.	N.D.	N.D.	N.D.	N.D.	N.D.	N.D.	N.D.	N.D.	N.D.	N.D.	1.11382e-05	N.D.	N.D.	N.D.	N.D.	1.22905e-05	N.D.	N.D.	1.80606e-05	N.D.	N.D.	N.D.	1.73299e-05
Cysteic acid	Cysteic acid	72886	HMDB0002757	167.997	0.000254101	0.000106019	0.000187238	0.000152205	4.7626e-05	3.95283e-05	3.31357e-05	3.91817e-05	9.51127e-05	8.90061e-05	8.97706e-05	8.36547e-05	3.31936e-05	3.48262e-05	3.80866e-05	3.13221e-05	4.49468e-05	5.96561e-05	6.44237e-05	5.48857e-05	0.00013397	0.000145831	0.000148035	0.000128353	0.000188273	9.55621e-05	0.00015608	0.000106916	5.71497e-05	6.95062e-05	0.000148406	8.77543e-05	7.68591e-05	0.000154765	5.9863e-05	6.95716e-05	3.52663e-05	6.03868e-05	5.10243e-05	6.0709e-05
Cysteine glutathione disulfide	Cysteine glutathione disulfide	10455148	HMDB0000656	427.095	0.0997758	0.0546592	0.123405	0.0351551	0.0819875	0.0425424	0.0452893	0.0573756	0.124158	0.0933114	0.0569526	0.0548639	0.041235	0.00959097	0.0247327	0.00681356	0.0138732	0.00946147	0.0142452	0.0185383	0.0817283	0.0736746	0.0789578	0.0778692	0.123783	0.161932	0.0941375	0.104781	0.180519	0.205044	0.0847978	0.146935	0.03751	0.121045	0.180393	0.0553537	0.0199274	0.0739403	0.0216203	0.0188395
Cysteinesulfinic acid	Cysteinesulfinic acid	1549098	HMDB0000996	152.002	0.000277845	9.34078e-05	0.000140683	0.000148948	0.000112154	5.89191e-05	9.73564e-05	9.45519e-05	0.000173437	0.000125057	0.000103229	8.09218e-05	3.94051e-05	4.47038e-05	3.6845e-05	1.18751e-05	2.11281e-05	3.36206e-05	2.14136e-05	2.73871e-05	0.000247984	0.000243979	0.00013426	0.000161401	0.00027495	7.77588e-05	9.96257e-05	6.77811e-05	8.67277e-05	9.36474e-05	0.000118804	8.80634e-05	5.02858e-05	5.74235e-05	7.32837e-05	5.63284e-05	1.29016e-05	3.22859e-05	3.74407e-05	2.39922e-05
Cystine	Cystine	595	HMDB0000192	241.031	0.0329525	0.00536191	0.0221604	0.00792613	0.011017	0.00353393	0.00359281	0.00700371	0.0415945	0.0303279	0.0130856	0.0120812	0.00809762	0.000757465	0.00324505	0.000588758	0.000781295	0.000832527	0.00114741	0.00282773	0.0211882	0.0233739	0.0241643	0.0245551	0.0279645	0.0257748	0.0121532	0.0260281	0.144294	0.106496	0.0310944	0.0512474	0.00987579	0.0379558	0.0509887	0.016192	0.00260304	0.00665472	0.00235045	0.00228566
Cytidine	Cytidine	6175	HMDB0000089	244.093	0.0025068	0.00128236	0.00356874	0.00243498	0.00876037	0.00933856	0.0111867	0.0108982	0.0253226	0.0106997	0.0120039	0.00968771	0.00459355	0.00266907	0.00400783	0.00325465	0.00475321	0.00448241	0.00424641	0.00403929	0.00339961	0.00206259	0.00250828	0.00722764	0.000732186	0.000479282	0.0018603	0.00183584	0.00128853	0.0022401	0.000759788	0.00427888	0.00150885	0.00171167	0.00170489	0.00306605	0.00237785	0.00217405	0.00274383	0.00573456
Cytosine	Cytosine	597	HMDB0000630	112.051	0.000432932	0.000122063	0.000132732	0.000198524	9.55569e-05	7.3076e-05	0.00016252	6.76204e-05	N.D.	5.56472e-05	6.9703e-05	5.41759e-05	0.000121455	0.000110134	9.4735e-05	3.63357e-05	8.62705e-05	0.00010517	0.000116491	7.44059e-05	0.00076417	0.000848396	0.000774324	0.000957422	0.000354636	0.000189826	0.000225744	0.000189795	4.97248e-05	7.14152e-05	0.000146647	7.91942e-05	5.04518e-05	6.9381e-05	4.64236e-05	2.99355e-05	6.70112e-05	8.44862e-05	6.82119e-05	3.62373e-05
dADP	dADP	188966	HMDB0001508	410.026	N.D.	N.D.	8.04827e-06	7.51614e-06	1.18065e-05	9.0686e-06	N.D.	1.21993e-05	N.D.	4.86913e-06	N.D.	6.79072e-06	N.D.	N.D.	3.60284e-06	8.75159e-06	N.D.	N.D.	1.05771e-05	N.D.	9.37015e-06	4.19125e-06	6.16579e-06	4.57604e-05	N.D.	N.D.	2.75437e-05	1.88664e-05	N.D.	2.01795e-05	6.26641e-05	2.40294e-05	2.71682e-05	1.33117e-05	3.5904e-05	3.77354e-05	5.61334e-06	N.D.	1.27908e-05	4.06329e-05
dAMP	dAMP	12599	HMDB0000905	330.06	0.000476868	0.000132793	0.000264553	0.000258452	0.000206618	0.000155893	0.000136997	0.000162769	0.000108391	8.64701e-05	6.74116e-05	6.7707e-05	6.96362e-05	0.000119636	8.90838e-05	9.55344e-05	9.17849e-05	0.000114341	0.000102878	8.64813e-05	0.000241765	0.000208962	0.000259414	0.000209846	0.000257354	0.000253484	0.000405034	0.00037568	0.000232765	0.000642804	0.000376373	0.000308335	0.000409633	0.000339395	0.000404622	0.000402774	0.000210633	0.000211374	0.000284057	0.000204017
dATP	dATP	15993	HMDB0001532	489.993	N.D.	N.D.	N.D.	N.D.	N.D.	N.D.	1.76616e-05	1.67193e-05	N.D.	3.07466e-06	3.13397e-05	4.05846e-05	N.D.	N.D.	N.D.	N.D.	N.D.	N.D.	N.D.	N.D.	N.D.	N.D.	N.D.	2.22294e-05	N.D.	N.D.	N.D.	4.02838e-06	N.D.	N.D.	2.67417e-05	6.48709e-06	N.D.	N.D.	N.D.	6.28058e-06	N.D.	N.D.	N.D.	1.10725e-05
dCDP	dCDP	150855	HMDB0001245	386.015	N.D.	N.D.	N.D.	N.D.	1.67557e-05	1.14929e-05	6.18344e-06	N.D.	N.D.	4.34381e-06	N.D.	N.D.	N.D.	N.D.	N.D.	N.D.	N.D.	N.D.	N.D.	N.D.	8.092e-06	N.D.	N.D.	2.12213e-06	N.D.	N.D.	6.06428e-05	1.32766e-05	1.35826e-05	1.92369e-05	5.25374e-05	2.01187e-05	7.94207e-06	1.49456e-05	6.90566e-06	1.35763e-05	4.98499e-06	N.D.	2.82048e-06	4.89214e-06
dCMP	dCMP	13945	HMDB0001202	306.049	0.000196596	8.76127e-05	0.000135578	0.000119085	0.000130968	0.000140911	0.000141256	9.15775e-05	0.000106321	7.68003e-05	9.89611e-05	6.98011e-05	8.33907e-05	6.63132e-05	7.46464e-05	7.62327e-05	5.76347e-05	6.80325e-05	6.01811e-05	5.86916e-05	8.55115e-05	3.38373e-05	6.34575e-05	0.000103567	7.25427e-05	3.39096e-05	0.000104032	9.33789e-05	8.6297e-05	0.000157498	0.000168787	0.000136474	0.000119334	0.000137375	0.000112572	0.000178712	8.35977e-05	5.94639e-05	6.63304e-05	8.6423e-05
dCTP	dCTP	65091	HMDB0000998	465.981	N.D.	N.D.	N.D.	N.D.	N.D.	4.78226e-06	1.50039e-05	N.D.	N.D.	N.D.	9.28936e-06	1.31901e-05	N.D.	N.D.	N.D.	N.D.	N.D.	N.D.	N.D.	N.D.	N.D.	N.D.	N.D.	N.D.	N.D.	N.D.	1.11797e-05	N.D.	N.D.	N.D.	2.06377e-05	4.28919e-06	N.D.	N.D.	N.D.	N.D.	N.D.	N.D.	N.D.	N.D.
Deamido-NAD+	Deamido-NAD	165491	HMDB0001179	663.084	N.D.	3.6863e-06	1.36973e-05	3.10499e-05	N.D.	5.11188e-05	0.000177849	5.15704e-05	N.D.	N.D.	4.34382e-06	N.D.	0.00028758	0.000131411	0.000186928	0.000213371	1.45895e-05	7.74283e-06	1.07508e-05	2.42006e-05	0.000311838	0.000220647	0.000253497	0.000212191	0.000481358	9.81469e-05	0.000122756	0.0002575	8.72368e-06	8.59112e-06	N.D.	N.D.	0.00021314	0.000133056	0.000202909	0.000193619	9.66861e-06	6.24078e-06	1.1671e-05	2.13808e-05
Decanoic acid	Decanoic acid	2969	HMDB0000511	171.139	0.00934734	0.00162104	0.00181113	0.00159992	0.00279766	0.00236156	0.00301129	0.00177723	0.00831774	0.00236181	0.00172662	0.0017926	0.00303465	0.000985707	0.00129624	0.000721778	0.00200514	0.00118566	0.000837235	0.000868789	0.0031785	0.00291516	0.00242086	0.00198062	0.00678282	0.00272045	0.0030002	0.00274801	0.00337392	0.00303193	0.00380964	0.0029452	0.00191981	0.00184636	0.00184766	0.00171321	0.00146763	0.00170202	0.00237296	0.00176158
Decarboxylated S-Adenosylmethionine	dcSAM	439415	HMDB0000988	355.155	0.00016085	4.52812e-05	7.43346e-05	4.44538e-05	4.62429e-05	3.74661e-05	1.97864e-05	3.67802e-05	N.D.	N.D.	1.51316e-05	9.29006e-06	0.000140913	2.37301e-05	2.91911e-05	4.75313e-05	8.12534e-05	3.48346e-05	8.65044e-05	7.76131e-05	6.85247e-05	0.000132724	0.000109877	8.42578e-05	N.D.	3.57433e-05	2.11716e-05	1.54232e-05	6.96922e-05	0.000191662	9.22009e-05	7.64288e-05	6.65105e-05	6.04167e-05	3.88584e-05	2.84624e-05	4.42115e-05	4.44604e-05	7.25988e-05	5.73592e-05
Diclofenac	Diclofenac	3033		294.009	N.D.	N.D.	N.D.	N.D.	N.D.	3.2447e-06	N.D.	6.0938e-06	N.D.	N.D.	N.D.	N.D.	N.D.	N.D.	N.D.	N.D.	N.D.	N.D.	N.D.	N.D.	N.D.	N.D.	N.D.	N.D.	N.D.	N.D.	N.D.	N.D.	N.D.	N.D.	N.D.	N.D.	N.D.	N.D.	N.D.	N.D.	N.D.	N.D.	N.D.	N.D.
Diethanolamine	Diethanolamine	8113	HMDB0004437	106.086	0.027245	0.00204056	0.011796	0.00294346	0.13401	0.00321476	0.00338471	0.0028573	0.0388665	0.00784506	0.00366106	0.00700289	0.0077579	0.00242913	0.00589404	0.00241825	0.00971446	0.00296178	0.00263306	0.00180271	0.00400133	0.00520918	0.00417628	0.00157434	0.0483236	0.00901069	0.0103616	0.00568946	0.00591999	0.00224922	0.00660143	0.00282437	0.00272309	0.00460027	0.0015669	0.00249303	0.0134726	0.00583367	0.00280437	0.00198763
Digalacturonic acid	Digalacturonic acid	439694		369.067	N.D.	N.D.	N.D.	N.D.	N.D.	N.D.	N.D.	N.D.	N.D.	6.05e-06	N.D.	N.D.	N.D.	N.D.	N.D.	N.D.	N.D.	N.D.	N.D.	N.D.	N.D.	N.D.	N.D.	N.D.	N.D.	N.D.	7.96203e-06	N.D.	N.D.	1.02113e-05	5.5541e-06	1.64887e-06	N.D.	4.13287e-06	N.D.	N.D.	N.D.	N.D.	N.D.	N.D.
Dihydroorotic acid	Dihydroorotic acid	439216	HMDB0000528	157.025	8.56453e-06	2.2125e-06	8.31716e-06	3.73792e-06	N.D.	2.29286e-05	3.6769e-06	1.07378e-05	N.D.	4.52922e-06	N.D.	6.31612e-06	N.D.	6.0094e-06	6.35553e-06	7.65298e-06	N.D.	N.D.	3.04202e-06	5.08829e-06	7.37053e-06	1.00796e-05	1.63022e-05	1.84345e-05	N.D.	2.23037e-05	2.22174e-05	3.30871e-05	3.73799e-05	9.2382e-05	8.06332e-05	0.000101345	5.90879e-05	6.57708e-05	0.0001732	0.000151545	1.89261e-05	4.23796e-05	5.73429e-05	4.66674e-05
Dihydrouracil	Dihydrouracil	649	HMDB0000076	113.035	N.D.	N.D.	N.D.	N.D.	N.D.	N.D.	N.D.	N.D.	N.D.	N.D.	N.D.	N.D.	N.D.	N.D.	N.D.	N.D.	N.D.	N.D.	N.D.	N.D.	N.D.	2.09166e-06	2.39298e-06	N.D.	N.D.	3.42476e-06	3.01896e-06	N.D.	N.D.	1.43883e-05	1.64416e-05	2.25102e-05	1.1375e-05	1.39469e-05	3.76837e-05	3.11935e-05	N.D.	8.59636e-06	9.31269e-06	8.47546e-06
Dihydroxyacetone phosphate	DHAP	668	HMDB0001473	168.99	0.00576617	0.00128299	0.00211416	0.00268518	0.000832723	0.000874507	0.00235893	0.00123656	0.00721976	0.00610457	0.00974589	0.0100133	0.00300407	0.00692358	0.00588612	0.00706854	0.00240934	0.0045049	0.00910093	0.00797081	0.000213184	0.000603016	0.000634117	0.000811075	0.000566221	0.000615013	0.000419699	0.000515893	5.83487e-05	8.67183e-05	0.000594239	0.000190418	0.000204758	0.000390036	0.000105537	0.000171425	0.000643842	0.000538678	0.000804063	0.00310072
dIMP	dIMP	91531	HMDB0006555	331.044	N.D.	4.90433e-06	9.73879e-06	8.30804e-06	1.12172e-05	1.15703e-05	5.57855e-06	9.14067e-06	N.D.	8.28588e-06	4.1895e-06	5.62107e-06	N.D.	1.10397e-05	1.4624e-05	1.81242e-05	8.1853e-06	2.03922e-05	2.32483e-05	1.75716e-05	6.57559e-06	7.21275e-06	4.67741e-06	4.26096e-06	1.51828e-05	2.10574e-05	1.99142e-05	1.74003e-05	N.D.	1.20288e-05	1.18986e-05	1.62382e-05	1.30062e-05	1.1916e-05	1.09931e-05	1.06455e-05	7.5966e-06	8.42794e-06	9.78033e-06	1.13109e-05
Dodecanedioic acid	Dodecanedioic acid	12736	HMDB0000623	229.144	0.00133171	0.000221615	0.00010927	6.05381e-05	0.000322528	0.000234548	0.000161616	5.4636e-05	0.00206098	0.000227953	0.000189965	6.18228e-05	0.000622828	0.00019285	0.000101181	3.1291e-05	0.000427454	0.000183206	5.75092e-05	4.95961e-05	0.000110286	0.00021481	5.24406e-05	8.95081e-06	0.000744258	0.000347735	0.000190489	6.76109e-05	0.000154857	0.000126822	9.30363e-05	9.35182e-05	0.000165051	0.000258048	8.68398e-05	4.13645e-05	0.000140792	0.000156001	9.08945e-05	2.41299e-05
DOPA	DOPA	6047	HMDB0000181,HMDB0000609	198.076	0.00035474	4.08109e-05	9.25542e-05	3.59281e-05	N.D.	8.73646e-06	3.28083e-05	1.96952e-05	N.D.	5.32229e-05	7.25165e-05	4.4052e-05	7.39628e-05	N.D.	3.20128e-05	1.98905e-05	N.D.	5.45752e-05	4.39928e-05	0.000102751	N.D.	1.51205e-05	2.61166e-05	0.000101205	N.D.	3.40501e-05	2.02736e-05	0.000412579	5.02583e-05	3.3084e-05	6.96038e-05	0.000180969	N.D.	N.D.	1.74659e-05	5.82804e-06	3.65476e-05	4.16837e-05	2.68285e-05	3.22233e-05
dTDP	dTDP	164628	HMDB0001274	401.015	N.D.	N.D.	N.D.	N.D.	1.51069e-05	5.6137e-06	N.D.	3.79284e-06	N.D.	N.D.	N.D.	N.D.	N.D.	N.D.	N.D.	N.D.	N.D.	N.D.	N.D.	N.D.	N.D.	N.D.	N.D.	N.D.	2.6261e-05	5.5841e-05	0.000139375	5.97175e-05	N.D.	4.05423e-05	2.53897e-05	3.15205e-06	2.77441e-05	1.08232e-05	4.30027e-05	2.92008e-05	N.D.	N.D.	N.D.	N.D.
dTMP	dTMP	9700	HMDB0001227	321.049	0.000711323	0.00030189	0.000469749	0.000367356	0.000368026	0.000245407	0.000143176	0.000206543	7.19933e-05	3.71144e-05	3.23177e-05	5.02297e-05	0.000121649	0.000220727	0.000136696	0.000232737	0.000245163	0.000291448	0.000238935	0.000246151	0.000325388	0.000260153	0.000325619	0.000255211	0.000431326	0.000468796	0.000690067	0.000703345	0.000268678	0.0008036	0.000465126	0.000403573	0.000636067	0.000419179	0.000593548	0.000523867	0.000256913	0.000152707	0.000282564	0.000199781
dTTP	dTTP	64968	HMDB0001342	480.981	N.D.	N.D.	N.D.	N.D.	N.D.	5.10671e-06	N.D.	N.D.	N.D.	N.D.	N.D.	N.D.	N.D.	N.D.	N.D.	N.D.	N.D.	N.D.	N.D.	N.D.	N.D.	N.D.	N.D.	N.D.	N.D.	6.94855e-06	3.25699e-05	1.54735e-05	N.D.	N.D.	5.0811e-06	N.D.	N.D.	N.D.	4.23837e-06	2.93082e-06	N.D.	N.D.	N.D.	N.D.
dUMP	dUMP	65063	HMDB0001409	307.033	0.000474868	0.000169772	0.000296387	0.000346056	0.000545291	0.000618328	0.000568161	0.000573686	0.000499668	0.000292783	0.000193346	0.000313163	0.000196182	0.000264548	0.000287142	0.000219004	0.000187122	0.000231161	0.000204112	0.000229019	0.000430588	0.000435253	0.00039498	0.000330308	0.000565333	0.000477534	0.00072921	0.000673894	0.000532723	0.00138522	0.00100648	0.000907268	0.000924453	0.000731794	0.00119281	0.000948657	0.000205036	0.00029495	0.000358396	0.000301254
Ectoine	Ectoine	126041		143.082	N.D.	2.25227e-05	N.D.	N.D.	5.14856e-05	5.69095e-05	4.73813e-05	4.9548e-05	0.000132522	4.65351e-05	6.23962e-05	6.14811e-05	4.52122e-05	2.98291e-05	2.89291e-05	3.01415e-05	4.89398e-05	7.13693e-05	6.07661e-05	8.01051e-05	N.D.	2.14933e-05	N.D.	N.D.	8.43595e-05	6.99276e-05	6.13989e-05	5.96793e-05	5.28e-05	5.38078e-05	5.0015e-05	6.19614e-05	3.74629e-05	3.5096e-05	4.89453e-05	3.37354e-05	5.41642e-05	4.05784e-05	4.92067e-05	4.56969e-05
Ergothioneine	Ergothioneine	3037043	HMDB0003045	230.096	N.D.	0.000298847	N.D.	0.00227223	N.D.	0.000552319	N.D.	N.D.	N.D.	N.D.	0.000376149	N.D.	N.D.	N.D.	0.000480212	N.D.	N.D.	0.00552508	0.000261287	N.D.	0.00089741	0.0248466	0.0207903	0.0131987	N.D.	N.D.	N.D.	N.D.	N.D.	N.D.	N.D.	N.D.	0.00423298	0.00313118	N.D.	0.000725736	0.0225798	8.82536e-05	0.0503122	0.0172417
Ethanolamine	Ethanolamine	700	HMDB0000149	62.0601	0.0576373	0.0181567	0.0248366	0.0190734	0.0274412	0.0257152	0.0281582	0.0243057	0.0380918	0.0265492	0.0244152	0.0234672	0.0261209	0.0145942	0.0194485	0.0150645	0.0180318	0.0142904	0.0139166	0.0143787	0.0247447	0.0252985	0.0313721	0.0187666	0.0532165	0.0414803	0.04467	0.0410029	0.0374355	0.0327396	0.0257582	0.0317813	0.0188855	0.0217985	0.020889	0.0212615	0.022199	0.0219572	0.0238965	0.0199805
Ethanolamine phosphate	EAP	1015	HMDB0000224	140.012	0.236218	0.091349	0.114467	0.103682	0.114842	0.118872	0.0881107	0.0863879	0.174998	0.11153	0.105005	0.102671	0.0971877	0.0865102	0.0797561	0.0761334	0.116466	0.131797	0.10563	0.10699	0.0798912	0.0746219	0.0846498	0.0834389	0.150389	0.148813	0.137611	0.114323	0.125262	0.144609	0.101726	0.144216	0.0928679	0.105266	0.103643	0.099089	0.103308	0.109335	0.0952073	0.0980957
FAD_divalent	FAD	643975		391.571	0.00290121	0.00135517	0.00185056	0.00175524	0.00179678	0.00215835	0.00156418	0.0016588	0.00244201	0.00160825	0.00138061	0.00136975	0.00228135	0.00189211	0.00188738	0.00153969	0.00204703	0.00220578	0.00229283	0.00198703	0.00114924	0.000913946	0.00124389	0.00108036	0.00177685	0.00170983	0.00219569	0.0018093	0.000982128	0.00123162	0.000799698	0.00161268	0.00153988	0.00127328	0.00160371	0.00171654	0.00148566	0.00169358	0.00172639	0.0016623
FMN	FMN	643976	HMDB0001520	455.096	8.1378e-05	3.48043e-05	6.90388e-05	6.0119e-05	4.17273e-05	6.10263e-05	7.13383e-05	4.87409e-05	0.000100397	4.83117e-05	0.000126833	0.000118969	6.80475e-05	5.11991e-05	7.43173e-05	4.52553e-05	4.25525e-05	4.38118e-05	5.14749e-05	2.95318e-05	3.60265e-05	3.43369e-05	5.87077e-05	7.75366e-05	5.9097e-05	1.90359e-05	5.52152e-05	5.25482e-05	4.39558e-05	2.36669e-05	5.2563e-05	6.07434e-05	3.60632e-05	4.5493e-05	2.14958e-05	5.22714e-05	4.64299e-05	3.5329e-05	5.24655e-05	8.76065e-05
Formiminoglutamic acid	Formiminoglutamic acid	439233	HMDB0000854	173.056	N.D.	1.04311e-05	1.87709e-05	1.69768e-05	2.98902e-06	7.45543e-06	5.39253e-05	5.49284e-06	N.D.	4.36588e-06	2.05312e-06	2.90163e-06	4.32314e-05	4.18363e-05	4.30813e-05	5.2711e-05	N.D.	N.D.	N.D.	N.D.	3.76855e-05	3.44816e-05	7.52077e-05	3.67149e-05	2.13523e-05	9.43769e-06	1.29193e-05	1.06985e-05	N.D.	N.D.	5.00027e-06	2.24764e-06	5.54238e-05	0.000113694	0.000111691	9.84466e-05	N.D.	N.D.	N.D.	N.D.
Formylanthranilic acid	Formylanthranilate	101399	HMDB0004089	164.035	N.D.	3.54143e-06	5.27589e-06	N.D.	5.81318e-06	N.D.	N.D.	N.D.	N.D.	N.D.	1.63175e-06	7.69719e-06	N.D.	3.95606e-06	N.D.	N.D.	N.D.	6.04691e-06	N.D.	N.D.	N.D.	2.06707e-05	N.D.	N.D.	N.D.	9.80991e-06	6.23662e-06	7.03092e-06	1.55375e-05	8.45361e-06	1.09072e-05	1.18886e-05	3.13741e-06	6.59629e-06	3.84782e-06	5.8151e-06	2.99473e-06	6.46457e-06	7.78552e-06	4.63531e-06
Fructose 1,6-diphosphate	F1,6P	172313	HMDB0001058	338.988	0.0371573	0.0218148	0.0134409	0.0153964	0.0130061	0.0103344	0.013031	0.00651794	0.0969885	0.0773495	0.0454836	0.0354481	0.0506108	0.104532	0.0342581	0.0322788	0.0366355	0.0318809	0.015162	0.0139496	0.00540757	0.00923993	0.00992949	0.00281145	0.011639	0.0636973	0.0146706	0.0127225	0.00478122	0.00843652	0.0049428	0.00342843	0.0161408	0.00875847	0.00239507	0.00181549	0.0114433	0.00519589	0.00460384	0.00471388
Fructose 6-phosphate	F6P	603	HMDB0000124	259.022	0.0025255	0.00203684	0.00130481	0.00152385	0.000713577	0.000894713	0.00142279	0.000667377	0.00511604	0.00406437	0.003364	0.00233037	0.00442616	0.0148023	0.00557336	0.00826493	0.00574682	0.00681299	0.00537798	0.00583143	0.000675183	0.00104387	0.00114201	0.000678832	0.00045592	0.00540105	0.00091271	0.00180726	0.000268404	0.000615302	0.000651723	0.000904143	0.00168696	0.00121409	0.000422356	0.000703438	0.00143867	0.000772288	0.00104918	0.00112328
Fumaric acid	Fumaric acid	444972	HMDB0000134	115.003	0.00825159	0.00321355	0.0070383	0.00741349	0.00544024	0.00694619	0.00823664	0.0103773	0.00687248	0.0056883	0.00688179	0.00716654	0.00697709	0.00593127	0.00859641	0.00721499	0.00261444	0.00413076	0.00518489	0.00411701	0.00306287	0.0034421	0.00423494	0.00365501	0.00286983	0.00285524	0.00241859	0.0045243	0.00165872	0.00262598	0.00383549	0.00490859	0.00516698	0.00648147	0.0108964	0.00961442	0.00370932	0.0039615	0.00503089	0.00500314
Furosemide	Furosemide	3440	HMDB0001933	329	N.D.	N.D.	N.D.	N.D.	N.D.	N.D.	N.D.	N.D.	N.D.	N.D.	N.D.	N.D.	0.00135452	0.00045743	0.00101981	0.000627788	N.D.	N.D.	N.D.	N.D.	N.D.	N.D.	N.D.	N.D.	N.D.	N.D.	N.D.	N.D.	N.D.	N.D.	N.D.	N.D.	0.000773048	0.000971681	0.00188434	0.00148225	N.D.	N.D.	N.D.	N.D.
GABA	GABA	119	HMDB0000112	104.071	0.137395	0.0379331	0.0618265	0.0590147	0.195273	0.228404	0.180824	0.199208	0.00937991	0.00653036	0.00638547	0.00514893	0.0484335	0.0156919	0.0334463	0.0170538	0.00892666	0.00872559	0.00870563	0.00875082	0.0295113	0.0213025	0.0267898	0.0314003	0.122449	0.0727087	0.241584	0.123221	0.0128897	0.0131487	0.00900597	0.0126066	0.0587825	0.0487004	0.0689514	0.0686721	0.0195085	0.0256645	0.024104	0.0238012
GDP	GDP	8977	HMDB0001201	442.016	0.00843331	0.00228767	0.00135127	0.000886636	0.00821476	0.00328783	0.00109432	0.00208877	0.00518001	0.00102652	0.000224967	0.000848869	0.00319869	0.00154663	0.000786448	0.00071352	0.00244025	0.00117689	0.000536993	0.000549623	0.00148198	0.00188934	0.00103136	0.00112378	0.0111745	0.0141655	0.0128701	0.00712448	0.00736474	0.00965435	0.00408334	0.00469895	0.00547329	0.00432968	0.00669052	0.00527607	0.00124334	0.00165178	0.00113034	0.000913022
GDP-mannose-1 GDP-galactose-1 GDP-glucose-1	GDP-Man GDP-galactose GDP-glucose	18396 439695 46173703	HMDB0001163 HMDB0003351	604.068	0.0014653	0.000198399	0.000162377	0.000263188	0.000145751	0.000159791	8.57021e-05	8.93046e-05	0.00040022	0.000401156	0.000343493	0.000344925	0.00300749	0.00109456	0.00144494	0.0016043	0.00538466	0.00523247	0.00452544	0.00488427	0.000141476	7.4586e-05	0.000189926	0.000166651	0.00150685	0.0022246	0.00189453	0.00149909	0.00150317	0.00199564	0.000624552	0.00166647	0.000992984	0.000853202	0.000756199	0.00100247	0.0024577	0.00229679	0.00170636	0.00101451
GDP-mannose-2 GDP-galactose-2 GDP-glucose-2	GDP-Man GDP-galactose GDP-glucose	18396 439695 46173703	HMDB0001163 HMDB0003351	604.068	2.00634e-05	N.D.	N.D.	3.42962e-06	N.D.	N.D.	N.D.	N.D.	N.D.	1.16519e-05	1.8707e-05	7.11463e-06	N.D.	6.05781e-06	1.3893e-05	1.55863e-05	1.62775e-05	4.42582e-05	5.29011e-05	7.57051e-05	N.D.	N.D.	N.D.	2.85568e-05	N.D.	9.47872e-06	1.32761e-05	2.28789e-05	3.17197e-06	6.80354e-06	3.60287e-06	3.89261e-05	N.D.	3.04846e-06	N.D.	2.33875e-05	2.23997e-05	2.29652e-05	2.42626e-05	0.000175361
Gln	Gln	738	HMDB0000641,HMDB0003423	147.076	0.974228	0.379308	0.578878	0.473007	0.806671	0.735835	0.558547	0.834382	0.901191	0.554423	0.603678	0.516987	0.776869	0.517138	0.579381	0.537192	0.448553	0.472415	0.424454	0.481407	0.222498	0.242606	0.367003	0.221287	0.46153	0.393445	0.527376	0.321762	0.235534	0.294028	0.226092	0.328973	0.442868	0.533705	0.48509	0.473571	0.439502	0.47453	0.403636	0.35231
Glu	Glu	611	HMDB0000148,HMDB0003339	148.06	2.07851	0.864517	1.34128	1.05945	1.34109	0.978153	1.03113	1.2111	1.45092	1.25387	1.15598	1.07676	1.05992	0.645796	0.810563	0.794136	0.770236	0.759462	0.783445	0.864094	1.1013	1.16215	1.36201	1.03124	3.15887	2.1207	1.9715	1.86024	1.92967	1.59286	1.34105	1.47429	1.30973	1.45093	1.67825	1.57618	1.23774	1.17219	1.05314	1.04583
Glucaric acid	Glucaric acid	33037	HMDB0000663	209.03	0.000180253	0.000119731	0.000111492	9.00969e-05	0.000189664	0.000131545	0.000140444	0.000143609	0.000171824	0.000135848	0.000113298	0.000114295	0.000151855	0.000175727	0.000184603	0.000155763	9.11235e-05	8.44208e-05	8.18927e-05	7.44335e-05	7.6943e-05	8.88707e-05	9.3377e-05	5.93676e-05	0.000252221	0.000235216	0.000222312	0.000186812	0.000125316	0.000128998	0.000125527	0.000150418	0.000127543	0.000181938	0.000145824	0.000129117	9.42871e-05	0.000121731	0.000103619	9.35753e-05
Gluconic acid	Gluconic acid	10690	HMDB0000625	195.051	0.00391209	0.00147286	0.00195752	0.00197595	0.00477585	0.00410586	0.00507074	0.00434836	0.00496908	0.00333042	0.00324712	0.00356806	0.00258443	0.00310597	0.00317865	0.00339037	0.00247189	0.00414305	0.00411012	0.00326878	0.00245247	0.00235382	0.00247073	0.00245291	0.00806525	0.00538457	0.00511986	0.00546963	0.00360594	0.00354377	0.0054589	0.00452281	0.00199409	0.00294418	0.00263414	0.00271929	0.00385767	0.00406692	0.00385554	0.00446149
Gluconolactone	1,5-Gluconolactone	7027	HMDB0000150	179.055	0.00191362	0.00072559	0.000876208	0.000951603	0.0030062	0.0024894	0.00311706	0.00274145	N.D.	0.00208107	0.00172285	0.00211013	0.00148862	0.00192491	0.00169591	0.00220717	0.00180627	0.00190337	0.00217849	0.00200916	0.0014406	0.00122337	0.00145482	0.00148164	0.00496397	0.00309048	0.00321338	0.00326721	0.00222146	0.00206995	0.00296623	0.00234786	0.00106078	0.00145854	0.0012428	0.00159499	0.00239236	0.00252406	0.00233142	0.00240617
Glucosamine 6-phosphate	Glc-6P	440997	HMDB0001254	258.038	7.2704e-05	5.85319e-05	1.44414e-05	2.66571e-05	9.10756e-06	7.92556e-06	4.15046e-05	6.06105e-06	0.000139824	0.000126765	0.000102674	5.81788e-05	0.000206865	0.000927361	0.000281414	0.000446256	0.000156478	0.000144108	0.000150148	9.25282e-05	2.43606e-05	3.45213e-05	2.04465e-05	2.06829e-05	1.72415e-05	0.000139364	1.80814e-05	2.00261e-05	N.D.	1.54963e-05	9.25357e-06	6.54928e-06	5.76614e-05	6.26492e-05	1.4801e-05	3.27403e-05	5.89133e-06	4.10439e-06	1.01493e-05	1.17978e-05
Glucosamine Galactosamine	Glucosamine Galactosamine	439213 24154	HMDB0001514	180.087	N.D.	N.D.	N.D.	N.D.	N.D.	N.D.	0.000128049	N.D.	N.D.	N.D.	9.00069e-05	N.D.	N.D.	0.000942743	0.000453486	0.00112495	N.D.	0.000247685	N.D.	N.D.	N.D.	N.D.	N.D.	N.D.	N.D.	N.D.	N.D.	N.D.	N.D.	N.D.	N.D.	N.D.	9.30291e-05	0.000113061	N.D.	N.D.	N.D.	N.D.	4.5434e-05	N.D.
Glucose 1-phosphate	G1P	65533	HMDB0001586	259.022	0.00160179	0.00135323	0.000908387	0.00115367	0.000595833	0.000778305	0.00127071	0.000676911	0.00419791	0.00340556	0.00396759	0.00270151	0.0040896	0.0103952	0.00499612	0.00621755	0.00652193	0.00583536	0.0052775	0.00577762	0.000706146	0.000743947	0.000999421	0.000985548	0.00296396	0.0158005	0.00180073	0.00214393	0.000602085	0.000875848	0.000803058	0.000703518	0.00144254	0.0012565	0.000627122	0.000827335	0.00247816	0.00119688	0.00124551	0.0017221
Glucose 6-phosphate	G6P	5958	HMDB0001401	259.022	0.00976244	0.00675844	0.00296433	0.00488515	0.000716704	0.0014139	0.00436487	0.00191455	0.0141071	0.0119692	0.0120641	0.00925118	0.012267	0.0639851	0.0197472	0.0302448	0.0244143	0.0267376	0.0222547	0.0220256	0.00136591	0.00404517	0.00336606	0.00220842	0.00150251	0.0271023	0.00231511	0.0062069	0.000650971	0.00158105	0.00261615	0.00261554	0.00500846	0.00235654	0.00125274	0.00217252	0.00415197	0.00204168	0.00302868	0.00419711
Glucuronic acid-1 Galacturonic acid-1	Glucuronic acid Galacturonic acid	94715 439215	HMDB0000127 HMDB0002545	193.035	0.000847709	0.000353368	0.000408008	0.000394399	0.000184062	0.000169914	0.00020646	0.000182302	0.000363736	0.000218506	0.000216986	0.000213891	0.000202288	0.000250272	0.000241785	0.000262114	0.000135698	0.000165155	0.00017605	0.000181447	0.000206435	0.000176697	0.000212083	0.000231162	0.00036088	0.000250684	0.000259189	0.000247263	0.000192132	0.000148825	0.000275165	0.000218759	0.000132912	0.000160645	0.000124197	0.000128559	0.00019327	0.00021191	0.000229439	0.000251435
Glucuronic acid-2 Galacturonic acid-2	Glucuronic acid Galacturonic acid	94715 439215	HMDB0000127 HMDB0002545	193.035	N.D.	4.34808e-06	9.3761e-06	3.61097e-06	3.92024e-06	1.2647e-05	1.72204e-05	1.04642e-05	6.82121e-05	1.38481e-05	1.78435e-05	1.87684e-05	1.76608e-05	1.28796e-05	3.34106e-06	4.20342e-06	5.38107e-06	1.90179e-05	1.12135e-05	3.42722e-06	3.72312e-06	1.03413e-05	8.79037e-06	4.40022e-06	2.64668e-05	8.46801e-06	2.33326e-05	1.42094e-05	1.00431e-05	N.D.	2.2382e-05	1.4209e-05	7.67681e-06	4.20182e-06	N.D.	4.30403e-06	9.25048e-06	3.34301e-06	9.46795e-06	7.26527e-06
Glucuronic acid-3 Galacturonic acid-3	Glucuronic acid Galacturonic acid	94715 439215	HMDB0000127 HMDB0002545	193.036	7.85827e-05	3.51335e-05	1.91087e-05	1.90704e-05	5.88616e-05	1.35577e-05	1.5963e-05	3.78348e-06	N.D.	2.19773e-05	2.32347e-05	2.93627e-05	4.14151e-05	1.83367e-05	1.85793e-05	2.39412e-05	2.74773e-05	2.16359e-05	2.34875e-05	1.76438e-05	7.13674e-06	4.06238e-05	3.31013e-05	4.94272e-05	9.97558e-05	6.83245e-05	2.05428e-05	4.0808e-05	4.44257e-05	3.65247e-05	6.07957e-05	4.8551e-05	1.29854e-05	1.58921e-05	2.14781e-05	1.25415e-05	1.92064e-05	8.50409e-06	2.0116e-05	2.38731e-05
Glutaric acid Methylsuccinic acid	Glutaric acid Methylsuccinic acid	743 6950476	HMDB0000661 HMDB0001844	131.035	0.000557569	0.000141008	0.000148846	0.000147062	0.000254287	0.000141842	0.000272937	0.000188662	0.000313569	8.25346e-05	6.95081e-05	5.15141e-05	0.000481343	0.000147271	0.000216796	0.000162073	0.000126328	0.000111072	6.97472e-05	5.94728e-05	9.51779e-05	0.000184016	0.000100718	0.000108795	0.000592141	0.000451672	0.00047966	0.000426853	N.D.	9.85438e-05	9.93827e-05	7.43732e-05	0.000362345	0.000372493	0.000640445	0.000469818	8.05726e-05	0.000123141	9.27194e-05	5.90858e-05
Glutathione (GSH)	GSH	124886	HMDB0000125	308.091	0.0371387	0.195788	0.0033037	0.568937	0.0173335	0.702528	0.176468	0.756622	0.00301741	0.00196838	0.0846874	0.0162775	0.304976	0.437922	0.377514	0.55974	0.607279	0.595018	0.643391	0.609072	0.117767	0.0513253	0.21521	0.345137	0.167493	0.0561857	0.00280379	0.69973	0.00272387	0.00171646	0.0107802	0.038898	0.70516	0.0190364	0.0147993	0.780926	0.940316	0.387124	0.829577	0.727221
Glutathione (GSSG)_divalent	GSSG	65359		307.083	2.34205	0.851287	1.4089	0.699286	1.71406	1.0142	1.10371	0.749472	1.11184	0.903456	0.741731	0.922285	0.771625	0.397988	0.471371	0.273785	0.600985	0.610594	0.531702	0.581132	0.706378	0.862135	0.863351	0.541551	1.64097	1.67337	1.74099	0.772296	0.51133	0.855851	0.579514	1.02685	0.374264	0.880237	0.947497	0.426216	0.350488	0.909266	0.456875	0.303065
Gly	Gly	750	HMDB0000123	76.0393	0.652507	0.262729	0.422808	0.320991	0.354239	0.322942	0.272277	0.296813	0.385681	0.266521	0.265809	0.266808	0.227022	0.150513	0.184714	0.155612	0.227821	0.236685	0.214387	0.213517	0.267394	0.25331	0.276757	0.256788	0.412351	0.30306	0.276138	0.302546	0.362534	0.325459	0.267743	0.326401	0.281955	0.269213	0.339638	0.2947	0.290477	0.317395	0.295778	0.280649
Gly-Asp	Gly-Asp	97363		191.066	0.00395488	0.00154867	0.00266425	0.00236437	0.0017576	0.00242025	0.0018293	0.0020132	0.00254567	0.00213593	0.00231879	0.00194864	0.00129908	0.00100197	0.00102409	0.00101629	0.00123177	0.00118138	0.00122672	0.0013326	0.00150133	0.00161215	0.00146966	0.00114109	0.00304275	0.00211251	0.00239278	0.00220371	0.00206817	0.00232005	0.00291535	0.00210913	0.00229051	0.00214952	0.00301831	0.00277426	0.00135972	0.00141909	0.00152655	0.00130832
Gly-Gly	Gly-Gly	11163	HMDB0011733	133.061	0.0138165	0.00521801	0.00730942	0.00659312	0.00483226	0.00415229	0.00311335	0.00432811	0.00543411	0.00317509	0.00316219	0.0026306	0.00507068	0.00383078	0.00363212	0.00321855	0.0034667	0.00309495	0.00297526	0.00346034	0.00368637	0.00463765	0.0035393	0.00301562	0.0062591	0.00692246	0.00491369	0.00469841	0.00408619	0.00442952	0.00194906	0.00302053	0.00418695	0.00372572	0.00381839	0.00362274	0.00466372	0.00401037	0.00360885	0.00297953
Gly-Leu	Gly-Leu			189.124	N.D.	N.D.	N.D.	N.D.	N.D.	N.D.	N.D.	N.D.	N.D.	N.D.	N.D.	N.D.	0.00018409	0.000111749	0.000105625	0.000172953	N.D.	6.03074e-06	9.86135e-06	7.4835e-06	N.D.	N.D.	N.D.	N.D.	N.D.	N.D.	N.D.	2.46577e-05	N.D.	N.D.	N.D.	N.D.	8.21862e-05	8.78116e-05	0.000155181	0.000180621	N.D.	N.D.	N.D.	N.D.
Glyceraldehyde 3-phosphate	GAP	729	HMDB0001112	168.99	N.D.	1.27742e-05	N.D.	8.47126e-06	N.D.	1.89299e-05	N.D.	N.D.	5.62645e-05	1.11376e-05	N.D.	1.12556e-05	3.91859e-05	1.47913e-05	9.74584e-06	N.D.	3.40882e-05	N.D.	0.000182662	2.95121e-05	N.D.	N.D.	N.D.	N.D.	N.D.	1.97359e-05	N.D.	N.D.	N.D.	N.D.	N.D.	N.D.	N.D.	N.D.	N.D.	N.D.	N.D.	N.D.	N.D.	5.0296e-05
Glyceric acid	Glyceric acid	439194	HMDB0000139,HMDB0006372	105.019	0.00108003	0.000265516	0.000160444	0.000145986	0.000610668	0.000430517	0.001105	0.000383997	0.00210154	0.00105835	0.000667792	0.000696587	0.000900471	0.000788062	0.000909904	0.00109463	0.00049253	0.000535551	0.000701268	0.00053052	0.000502746	0.000507153	0.000402301	0.000387754	0.00208391	0.00111002	0.00149628	0.0012263	0.000616462	0.000430784	0.000856522	0.000599808	0.00023779	0.000798698	0.000554589	0.000523312	0.000455714	0.000498875	0.000604851	0.000575684
Glycerol	Glycerol	753	HMDB0000131	93.0546	2.11263	0.307698	0.289373	0.216783	1.00472	0.234575	0.290777	0.361105	2.32371	0.506775	0.105129	0.283527	1.1751	0.394152	0.271459	0.175705	0.821784	0.367283	0.173276	0.272017	0.226057	0.528789	0.380599	0.207772	1.36934	0.740028	0.425581	0.307647	0.245833	0.269895	0.261819	0.20899	0.302372	0.252021	0.24461	0.197026	0.210734	0.358175	0.149355	0.144313
Glycerol 2-phosphate	Glycerol 2-phosphate	2526		171.006	0.000217843	8.2424e-05	9.09823e-05	9.00747e-05	9.98225e-05	0.000112954	0.000115602	9.75661e-05	8.6663e-05	7.07237e-05	7.17971e-05	6.07251e-05	9.90793e-05	9.20348e-05	0.000114309	7.52732e-05	6.47348e-05	7.51301e-05	7.21257e-05	6.70823e-05	6.70874e-05	7.3325e-05	7.68239e-05	8.87636e-05	0.000213672	0.000164617	0.000150139	0.000133374	9.72257e-05	0.00013077	0.000106257	0.00014095	7.35758e-05	9.68969e-05	0.000110448	9.41282e-05	9.07598e-05	9.01095e-05	9.44219e-05	7.87242e-05
Glycerol 3-phosphate	G3P	439162	HMDB0000126	171.006	0.00160372	0.000760811	0.000795674	0.000607249	0.00372655	0.00541991	0.00758415	0.00409352	0.00181432	0.00202254	0.00258642	0.00411791	0.00187108	0.00185195	0.00258416	0.00532979	0.00245075	0.00170272	0.00177893	0.00138583	0.00154235	0.000604281	0.00107723	0.00484458	0.0160327	0.0287889	0.021835	0.0142892	0.00879836	0.00641863	0.00268491	0.0076377	0.00493787	0.00794827	0.00716865	0.00799998	0.0113787	0.00885185	0.00245067	0.0083793
Glycerophosphocholine	GPCho	439285	HMDB0000086	258.11	0.163012	0.145351	0.0810469	0.0891851	0.0947241	0.171952	0.129272	0.0531987	0.956877	0.425745	0.450927	0.419209	0.503656	0.386428	0.325537	0.437144	0.895287	0.786216	0.779183	0.831858	0.0318626	0.0281042	0.0563645	0.0239705	0.360808	0.312669	0.200307	0.198106	0.0353822	0.0487501	0.11494	0.224599	0.0641229	0.100081	0.038764	0.0690027	0.714692	0.537465	0.46036	0.361588
Glycocholic acid	Glycocholic acid	10140	HMDB0000138	464.301	2.09687e-05	N.D.	1.13022e-05	8.5821e-06	1.02646e-05	2.50063e-05	5.92677e-05	1.19795e-05	N.D.	1.29741e-05	1.24089e-05	1.5156e-05	0.000132003	0.000114288	0.000115735	0.000139481	6.96922e-06	6.29252e-06	1.12112e-05	1.65889e-05	5.24844e-06	6.4772e-06	3.51951e-06	2.50088e-06	6.80458e-05	1.15957e-05	1.99365e-05	2.50985e-05	8.03988e-06	N.D.	1.89408e-05	9.32463e-06	9.08789e-05	0.000123944	0.000200408	0.000149769	8.80057e-05	0.000241635	2.10348e-05	5.52744e-05
Glycolic acid	Glycolic acid	757	HMDB0000115	75.0086	0.000681969	0.000153312	N.D.	0.000104228	0.000273342	0.000140354	0.00012463	0.00010218	N.D.	0.000176229	0.000123063	0.000162827	0.000211391	0.000109276	0.000114477	N.D.	0.000165904	0.000149356	N.D.	9.60451e-05	N.D.	0.000181653	N.D.	N.D.	0.000401205	0.000246979	0.000192251	0.000149667	N.D.	0.000112125	0.000173671	0.000137197	0.000111433	0.00018039	0.000125473	9.07051e-05	N.D.	0.000152418	0.000147092	N.D.
Glycyrrhetinic acid	Glycyrrhetinic acid	10114	HMDB0011628	469.332	N.D.	N.D.	N.D.	N.D.	N.D.	N.D.	N.D.	N.D.	N.D.	N.D.	N.D.	N.D.	N.D.	N.D.	N.D.	N.D.	N.D.	N.D.	N.D.	N.D.	N.D.	1.19552e-05	N.D.	7.85169e-06	N.D.	N.D.	N.D.	N.D.	N.D.	N.D.	N.D.	N.D.	N.D.	N.D.	N.D.	N.D.	N.D.	N.D.	N.D.	N.D.
GMP	GMP	6804	HMDB0001397	362.05	0.0643578	0.0275473	0.0353871	0.0248256	0.0240284	0.0217684	0.00669842	0.0120734	0.0126691	0.00589276	0.00230897	0.00263135	0.0202597	0.0332416	0.0193231	0.0358742	0.0475578	0.0445009	0.0440367	0.041022	0.0247772	0.0166403	0.0312796	0.0226455	0.0771572	0.0670841	0.0976595	0.0742886	0.0367976	0.0570841	0.0344018	0.0489679	0.0457867	0.0471633	0.0540927	0.0494324	0.0585304	0.0542145	0.0568252	0.039892
GTP	GTP	6830	HMDB0001273	521.983	0.00157757	0.000839776	0.000483057	0.000339689	0.0028122	0.00227594	0.00337115	0.00284524	0.00147864	0.00182073	0.00276459	0.00441248	0.00121226	0.00092675	0.000568758	0.000264134	0.000790412	0.000309049	0.00015155	0.000176193	0.000827165	0.000916805	0.00040165	0.000542561	0.00258574	0.0036834	0.00338763	0.001968	0.00219861	0.00264634	0.00165532	0.00143027	0.00152371	0.00127397	0.00113552	0.00126338	0.000319071	0.000375061	0.000207966	0.000297833
Guanidinosuccinic acid	Guanidinosuccinic acid	439918	HMDB0003157	176.067	0.000168294	5.42959e-05	8.40166e-05	7.66716e-05	0.000195198	0.000172655	0.00020201	0.000148215	0.000177228	0.000205366	0.000232675	0.000211879	0.000174253	0.00014538	0.000117691	0.000130775	0.000175274	0.000217502	0.000240141	0.000145379	6.29119e-05	6.56358e-05	4.65691e-05	6.19404e-05	0.000174745	0.000122531	0.00014082	0.00015893	9.43977e-05	7.54491e-05	0.000147738	0.000121829	0.000116168	0.000192768	0.000113435	0.000141239	0.000188261	0.00023018	0.000184163	0.000189162
Guanidoacetic acid	Guanidoacetic acid	763	HMDB0000128	118.061	0.0250444	0.00875347	0.0118362	0.0110087	0.0102473	0.0132306	0.00974265	0.00937037	0.0171405	0.0134962	0.0145601	0.0158878	0.00649821	0.00414439	0.00512311	0.0045244	0.0244409	0.0243753	0.0300567	0.0293633	0.00695054	0.00718945	0.00866738	0.00720233	0.015509	0.0158658	0.0105001	0.0118408	0.00978529	0.00693326	0.00565184	0.00925341	0.00621838	0.00770437	0.0109244	0.00834904	0.0139076	0.0124722	0.0160808	0.0125193
Guanine	Guanine	764	HMDB0000132	152.057	0.00283128	0.00422458	0.00334394	0.00348293	0.0234217	0.00938323	0.0103016	0.0143776	0.00149812	0.00630946	0.00208458	0.00355542	0.00688945	0.0012579	0.00293629	0.00124697	0.00107665	0.00335071	0.00176968	0.00241509	0.00335474	0.0012856	0.00261829	0.00780466	0.00624703	0.0033001	0.00381035	0.00812622	0.00371265	0.00365611	0.00325151	0.0041923	0.00107627	0.00100911	0.00148665	0.00251525	0.000756697	0.00222804	0.0020005	0.00591124
Guanosine	Guanosine	6802	HMDB0000133	284.099	0.0501825	0.0274865	0.0534605	0.0454933	0.057526	0.0674163	0.0540029	0.0670008	0.0882352	0.0641009	0.0639744	0.0623886	0.0599551	0.0466276	0.0518441	0.035535	0.0321129	0.0450969	0.0382499	0.0420717	0.0449686	0.0314677	0.0399381	0.0765636	0.0348352	0.0279987	0.0214747	0.0312349	0.0229974	0.0303036	0.0147836	0.0562655	0.0227435	0.0268226	0.0234447	0.0438196	0.0467753	0.0531765	0.0442541	0.069751
Heptanoic acid	Heptanoic acid	8094	HMDB0000666	129.092	0.00179567	0.000262105	0.000268009	0.000209654	0.000542977	0.000300509	0.000309845	0.000262566	0.00128146	0.000300566	0.000267191	0.000228775	0.000788779	0.000281807	0.000364461	0.000236924	0.000446395	0.00029083	N.D.	N.D.	0.000383032	0.000298471	0.0002075	0.000178188	0.000987414	0.000625868	0.000451129	0.000277075	0.00034329	0.000322389	0.000295251	0.000217199	0.000665649	0.000631377	0.00063966	0.000488095	0.000291329	0.000249451	0.000282961	0.000167609
Hexamine	Hexamine	4101		141.113	6.53363e-05	1.232e-05	2.18478e-05	N.D.	N.D.	1.3581e-05	N.D.	N.D.	N.D.	N.D.	N.D.	N.D.	2.2814e-05	6.31927e-06	N.D.	3.75649e-05	2.03498e-05	2.07572e-05	N.D.	N.D.	N.D.	2.58387e-05	1.13934e-05	N.D.	5.83215e-05	2.84439e-05	2.23213e-05	N.D.	N.D.	N.D.	1.06358e-05	6.86767e-06	2.03564e-05	1.04538e-05	2.24312e-05	1.01724e-05	N.D.	1.46651e-05	1.64705e-05	N.D.
Hexanoic acid	Hexanoic acid	8892	HMDB0000535	115.076	0.00181526	0.000358752	0.000319192	0.000353923	0.000538443	0.00035067	0.000851459	0.00036265	0.00151573	0.000382966	0.000412523	0.000337568	0.00102015	0.000382726	0.000577903	0.000308007	0.000410884	0.000297805	0.000184734	0.000142459	0.00102096	0.000751338	0.000764751	0.00072444	0.00178329	0.00113405	0.000976153	0.000770005	0.000625758	0.000901761	0.000737885	0.000645317	0.00117597	0.00105727	0.00139029	0.00119248	0.000367038	0.000484889	0.000493398	0.000382039
Hexylamine	Hexylamine	8102		102.128	0.000459272	N.D.	N.D.	N.D.	N.D.	N.D.	4.43263e-05	N.D.	N.D.	4.69836e-05	N.D.	N.D.	N.D.	4.01445e-05	N.D.	N.D.	N.D.	4.86593e-05	4.49022e-05	N.D.	N.D.	5.96419e-05	N.D.	N.D.	N.D.	N.D.	N.D.	N.D.	N.D.	N.D.	N.D.	2.96921e-05	4.55739e-05	4.89037e-05	N.D.	N.D.	N.D.	N.D.	N.D.	N.D.
Hippuric acid	Hippuric acid	464	HMDB0000714	178.051	N.D.	N.D.	N.D.	N.D.	2.84217e-05	1.48869e-05	3.10787e-05	2.78593e-05	N.D.	1.9801e-05	1.70042e-05	1.61524e-05	2.49806e-05	1.92782e-05	2.55284e-05	2.23192e-05	N.D.	N.D.	N.D.	2.06814e-06	N.D.	N.D.	N.D.	N.D.	1.18953e-05	1.29103e-05	1.62951e-05	1.76908e-05	N.D.	N.D.	2.24943e-05	N.D.	1.68219e-05	2.70789e-05	3.59573e-05	3.05525e-05	N.D.	N.D.	N.D.	N.D.
His	His	773	HMDB0000177	156.077	0.430098	0.176946	0.258233	0.226103	0.221762	0.239565	0.207476	0.229346	0.346172	0.143238	0.208353	0.211217	0.212307	0.126003	0.159754	0.141427	0.108844	0.153043	0.151725	0.16195	0.177315	0.187129	0.205684	0.169406	0.27213	0.214172	0.231762	0.229855	0.204452	0.210659	0.177973	0.182113	0.167359	0.174354	0.191594	0.195938	0.145322	0.138162	0.142763	0.125077
His-Glu	His-Glu	7010583		285.119	0.000490022	0.000233174	0.00031838	0.000327105	0.000332314	0.00035138	0.000250034	0.000242045	0.000266965	0.000157791	0.000173392	0.000132742	0.000486537	0.000283219	0.000239521	0.000196313	0.000300471	0.000264519	0.000219951	0.00026001	0.000174122	0.000226877	0.000215641	8.59053e-05	0.000262095	0.000329361	0.00017738	0.000148321	0.000101562	0.000164644	9.70477e-05	7.6683e-05	0.000305082	0.000318214	0.000334649	0.000273972	0.000165512	0.000136252	0.000125276	7.86272e-05
Histamine	Histamine	774	HMDB0000870	112.087	0.0889528	0.0262984	0.048942	0.0336767	0.118077	0.147876	0.120191	0.100861	0.106342	0.0691855	0.0665676	0.0713921	0.0604659	0.0467861	0.0401545	0.0479677	0.0689345	0.067953	0.0545877	0.0594675	0.085713	0.0570728	0.0813743	0.0586464	0.165949	0.0861857	0.150391	0.0919258	0.0586183	0.0418555	0.0358892	0.0790528	0.0409541	0.0477648	0.0240057	0.0311329	0.0853345	0.105117	0.0830978	0.0746902
HMG CoA_divalent	HMG-CoA	445127		454.571	N.D.	N.D.	N.D.	N.D.	N.D.	N.D.	N.D.	N.D.	N.D.	N.D.	N.D.	N.D.	N.D.	N.D.	N.D.	N.D.	N.D.	N.D.	N.D.	N.D.	N.D.	N.D.	N.D.	N.D.	N.D.	N.D.	N.D.	N.D.	N.D.	N.D.	N.D.	N.D.	8.84009e-06	6.09067e-06	7.32505e-06	5.30842e-06	N.D.	N.D.	N.D.	N.D.
Homoarginine	Homoarginine	9085	HMDB0000670	189.135	0.01188	0.00466165	0.00590573	0.00567242	0.00573691	0.00655831	0.00405563	0.00423198	0.00435963	0.00272136	0.00277352	0.00305382	0.00199352	0.00147707	0.00139263	0.00136103	0.00175627	0.00207072	0.0023038	0.00203402	0.00243999	0.00270388	0.00290092	0.00240183	0.00502234	0.00371707	0.00350761	0.00279241	0.00210228	0.00186994	0.00214482	0.00218778	0.00179027	0.0015468	0.00219776	0.00197156	0.00186637	0.00201669	0.00194608	0.00157402
Homocarnosine	Homocarnosine	10243361	HMDB0000745	241.13	0.000136628	8.40719e-05	9.29898e-05	0.000109126	0.000407728	0.000376713	0.000267721	0.000317129	0.000110538	4.24211e-05	0.000105904	5.1881e-05	0.00113101	0.000464066	0.000672477	0.000521912	0.000185516	0.000169423	0.000190146	0.000156423	9.3755e-06	2.78283e-05	1.10914e-05	2.2701e-05	0.00020263	0.000112103	0.000224417	0.000201618	6.61673e-05	3.64959e-05	4.03082e-05	3.7551e-05	0.000158959	0.000117987	0.00010943	0.000141613	7.93045e-05	0.00014498	8.82553e-05	0.000117079
Homocitrulline	Homocitrulline	65072	HMDB0000679	190.119	0.000489536	0.00017236	0.000267486	0.000242635	0.00044423	0.000474806	0.000528637	0.000412788	0.000565355	0.000579343	0.000533989	0.000439065	0.000644113	0.000405037	0.000444141	0.000445274	0.000254159	0.000222752	0.00024665	0.000289606	0.000178806	0.00017525	0.000156708	0.000191619	0.000983725	0.000556871	0.000618806	0.00107545	0.000374422	0.000514373	0.000415446	0.00042669	0.000881045	0.000796935	0.001328	0.00135335	0.000215764	0.000217962	0.000291429	0.000199907
Homocysteine	Homocysteine	778	HMDB0000742	136.043	N.D.	N.D.	N.D.	N.D.	N.D.	N.D.	N.D.	N.D.	N.D.	N.D.	N.D.	N.D.	N.D.	N.D.	N.D.	N.D.	N.D.	N.D.	N.D.	N.D.	N.D.	N.D.	N.D.	N.D.	N.D.	N.D.	N.D.	N.D.	N.D.	N.D.	N.D.	N.D.	0.00018394	N.D.	N.D.	0.000190655	N.D.	N.D.	N.D.	N.D.
Homoserine	Homoserine	12647	HMDB0000719	120.066	0.000927993	0.000298292	0.000495094	0.000346189	0.000440311	0.000418343	0.000388327	0.000394379	N.D.	0.000201271	0.00019873	N.D.	N.D.	0.000160421	0.000197686	0.000143999	N.D.	N.D.	N.D.	0.000175109	0.000764826	0.000738738	0.000777874	0.000898877	0.00110189	0.000921944	0.000755836	0.000796113	0.000915307	0.000984798	0.00065113	0.000731591	0.00058618	0.000569628	0.000915844	0.000729792	0.000277769	0.000337648	0.000285609	0.000264967
Homovanillic acid 3,4-Dihydroxyhydrocinnamic acid Hydroxyphenyllactic acid	HVA 3,4-Dihydroxyhydrocinnamic acid Hydroxyphenyllactic acid	1738 348154 9378	HMDB0000118 HMDB0000423 HMDB0000755	181.05	0.000606619	0.00028309	0.000450959	0.000407235	0.000313875	0.00034975	0.000335113	0.000305346	0.000677601	0.000476016	0.000602943	0.000492589	0.000544283	0.000491143	0.000500664	0.000358572	0.000285097	0.000277117	0.000350169	0.000252252	0.00050253	0.000478193	0.000520602	0.000374468	0.000640108	0.000483742	0.000577986	0.000530461	0.00065271	0.000854925	0.000532146	0.000845359	0.000708758	0.000783831	0.00129784	0.00109755	0.000475491	0.000472668	0.000553322	0.000551016
Hordenine	Hordenine	68313	HMDB0004366	166.123	0.00517042	0.00202688	0.00283267	0.00177903	0.0037103	0.00368809	0.00246353	0.00304493	0.00727655	0.0034825	0.00566143	0.00443229	0.010018	0.00882367	0.0078259	0.00822314	0.00462717	0.00497372	0.00462049	0.00452997	0.00252959	0.00191608	0.00268503	0.00172952	0.00389857	0.00383084	0.00356748	0.00343328	0.00102093	0.000993544	0.00116241	0.00165691	0.00433048	0.00655713	0.00446397	0.00438998	0.00335419	0.00303178	0.00338355	0.00247501
Hydroxyproline	Hydroxyproline	5810	HMDB0000725	132.066	0.0302567	0.012666	0.0206619	0.0172071	0.0256833	0.0246057	0.0172085	0.0232717	0.029155	0.0207105	0.0202991	0.0218981	0.0121958	0.009135	0.00907862	0.00859097	0.00875188	0.00934159	0.0096241	0.00842156	0.0149778	0.0142357	0.0187689	0.0153473	0.0252734	0.0171943	0.0183791	0.0171267	0.0240406	0.0266306	0.0250947	0.0265093	0.0269358	0.0227878	0.0316855	0.0294821	0.0166111	0.0223264	0.0173806	0.0168415
Hypotaurine	Hypotaurine	107812	HMDB0000965	110.027	0.0189147	0.0106409	0.0113855	0.0114063	0.0179847	0.0176707	0.0141583	0.0134762	0.0151826	0.0153708	0.0165657	0.0128373	0.0303193	0.0212301	0.0280046	0.0237558	0.0170187	0.0204513	0.0196303	0.0182959	0.0219563	0.0230333	0.0213258	0.0183581	0.0661675	0.0537851	0.055556	0.0475559	0.0346051	0.0360214	0.0274006	0.0411843	0.114856	0.0978572	0.112239	0.126299	0.0463887	0.0413921	0.038372	0.0390532
Hypoxanthine	Hypoxanthine	790	HMDB0000157	137.046	1.68212	0.715593	0.960423	0.928776	0.836973	0.828221	0.767217	0.778608	1.32817	1.07886	1.04494	1.00036	0.853431	0.477672	0.555027	0.399596	0.506608	0.502781	0.473958	0.560624	0.702773	0.818147	0.665474	0.5014	0.99455	0.831847	0.490103	0.646892	0.808832	0.68757	0.615667	0.680774	0.63139	0.658464	0.671567	0.620107	0.529643	0.462047	0.481391	0.511278
Ile	Ile	791	HMDB0000172	132.102	0.617821	0.222991	0.315986	0.2988	0.252374	0.316733	0.289684	0.284923	0.547522	0.380914	0.325206	0.35034	0.302192	0.191519	0.241185	0.188611	0.284072	0.26221	0.221768	0.261823	0.301089	0.308511	0.325764	0.265901	0.505271	0.38646	0.313823	0.359014	0.36289	0.336352	0.297644	0.326647	0.289012	0.284595	0.373566	0.341079	0.229901	0.197995	0.223585	0.180411
Ile-Pro-Pro	Ile-Pro-Pro			326.207	0.000320698	0.000158884	0.000206605	0.000219433	0.000120746	0.000172057	0.000132012	0.000100038	0.000213842	0.00012337	0.000172552	0.00014891	0.000522055	0.000432548	0.000356736	0.000384331	0.000289404	0.000218565	0.000236016	0.000234104	6.65731e-05	0.000174391	5.32778e-05	9.39607e-05	N.D.	0.000123563	2.7689e-05	3.89645e-05	4.21417e-05	0.000104345	6.09301e-05	5.01578e-05	9.45274e-05	0.000128396	0.000274597	0.000153707	4.33698e-05	3.62652e-05	8.59253e-05	6.29333e-05
Imidazole-4-acetic acid	Imidazole-4-acetic acid	96215	HMDB0002024	127.05	0.0484834	0.0228712	0.0260454	0.0229672	0.0174846	0.0135855	0.0123286	0.0167439	0.0273627	0.0145507	0.0170498	0.0138742	0.0239147	0.0150309	0.0150912	0.0110525	0.0177209	0.0121094	0.0165845	0.0200044	0.00475285	0.00742304	0.00724001	0.00357495	0.00061286	0.000235615	0.000754136	0.000640216	0.000451802	0.000977488	0.000995797	0.00173979	0.00104023	0.00204227	0.000627234	0.000693287	0.00398501	0.00312928	0.00476995	0.00276432
Imidazolelactic acid	Imidazolelactic acid	793		157.061	0.000648926	0.000230091	0.000362193	0.000307525	0.000670284	0.000689789	0.000566234	0.000709885	0.000473942	0.000226859	0.000285216	0.000318922	0.00116747	0.000824638	0.000996911	0.000972908	0.000379721	0.000276425	0.000286862	0.000323183	0.000249392	0.00018912	0.000259558	0.000266243	0.00105181	0.000836912	0.000513669	0.000750218	0.000552883	0.000682306	0.000526833	0.000556977	0.0011524	0.00136184	0.00170824	0.00156362	0.000260957	0.000322653	0.000270522	0.00030346
IMP	IMP	8582	HMDB0000175	347.039	0.0563372	0.0302097	0.0425408	0.0225266	0.0487378	0.0307209	0.00663274	0.0190336	0.0111593	0.00370468	0.00280394	0.00443906	0.0267183	0.0785002	0.0352803	0.0898304	0.123344	0.0912859	0.10025	0.093787	0.00706263	0.00425797	0.0106398	0.0057193	0.0218356	0.0204824	0.103263	0.0780705	0.0102881	0.0268249	0.0264094	0.0210317	0.032419	0.036698	0.024327	0.0266972	0.0528494	0.0410459	0.0501792	0.0202052
Indole-3-acetaldehyde	Indoleacetaldehyde	800	HMDB0001190	160.076	0.00163604	0.00075685	0.00104071	0.000972926	0.00179922	0.00227151	0.00182353	0.0018909	0.00797811	0.00604682	0.0036181	0.00354238	0.00240446	0.000855248	0.00117822	0.000977698	0.00174739	0.00188033	0.00203857	0.00181686	N.D.	8.16279e-05	0.000181445	5.7985e-05	N.D.	N.D.	N.D.	N.D.	N.D.	N.D.	N.D.	0.000158785	N.D.	N.D.	N.D.	N.D.	0.000156424	0.000289117	0.000651971	0.000147561
Indole-3-acetic acid	IAA	802	HMDB0000197	174.056	3.39995e-05	1.56038e-05	2.80887e-05	2.14462e-05	4.6594e-05	4.51328e-05	7.89283e-05	4.70106e-05	N.D.	1.61568e-05	1.54435e-05	1.23578e-05	4.46136e-05	2.55332e-05	3.42375e-05	2.26038e-05	1.56954e-05	2.2133e-05	2.52613e-05	1.56303e-05	2.30557e-05	2.03793e-05	2.59417e-05	1.971e-05	6.14773e-05	3.85431e-05	3.82612e-05	4.62798e-05	1.1251e-05	1.19152e-05	1.46539e-05	1.35037e-05	2.77214e-05	3.8109e-05	5.16459e-05	4.16528e-05	2.35023e-05	2.8996e-05	1.6457e-05	2.45162e-05
Indole-3-propionic acid	Indole-3-propionic acid	3744	HMDB0002302	188.071	N.D.	N.D.	N.D.	N.D.	N.D.	N.D.	N.D.	N.D.	N.D.	N.D.	N.D.	N.D.	1.91694e-05	2.54651e-06	2.63864e-05	N.D.	N.D.	N.D.	N.D.	N.D.	N.D.	N.D.	N.D.	N.D.	N.D.	N.D.	N.D.	N.D.	N.D.	N.D.	N.D.	N.D.	N.D.	N.D.	8.7785e-06	5.75243e-06	N.D.	N.D.	N.D.	N.D.
Inosine	Inosine	6021	HMDB0000195	269.088	0.310102	0.152757	0.201985	0.160779	0.298428	0.305136	0.247263	0.27493	0.505319	0.327011	0.313179	0.304208	0.428313	0.287913	0.305231	0.2554	0.309944	0.385237	0.329074	0.358967	0.133216	0.109362	0.134036	0.133812	0.204205	0.200996	0.118863	0.141443	0.112103	0.137386	0.102571	0.211834	0.151772	0.152467	0.141974	0.141971	0.247801	0.254594	0.200781	0.224865
Isethionic acid	Isethionic acid	7866	HMDB0003903	124.991	0.000752534	0.000243841	0.000320995	0.000267357	0.000572315	0.000459336	0.000504276	0.000414866	0.000678574	0.000431026	0.000436082	0.000394368	0.000420198	0.000346664	0.000349801	0.000349945	0.000350266	0.00039999	0.0003845	0.000313645	0.000359978	0.000489234	0.000419047	0.000492137	0.00113707	0.00110673	0.00074851	0.000658899	0.000467386	0.000359952	0.000364867	0.000433825	0.000334275	0.000432123	0.000468783	0.000407996	0.000375983	0.000395356	0.000344107	0.000357028
Isobutylamine	Isobutylamine	6558		74.0964	N.D.	N.D.	N.D.	N.D.	N.D.	N.D.	N.D.	N.D.	N.D.	0.00475323	0.00268511	N.D.	N.D.	N.D.	N.D.	N.D.	N.D.	N.D.	N.D.	N.D.	N.D.	N.D.	N.D.	N.D.	N.D.	N.D.	N.D.	N.D.	N.D.	N.D.	0.00381131	0.00245826	N.D.	N.D.	N.D.	N.D.	N.D.	N.D.	N.D.	N.D.
Isobutyryl CoA_divalent	Isobutyryl-CoA	3036931		417.571	N.D.	N.D.	4.33993e-06	N.D.	1.80716e-05	2.53087e-05	7.25522e-05	2.08956e-05	N.D.	8.44706e-06	5.49698e-06	7.97612e-06	0.000131713	4.0303e-05	6.18732e-05	5.59508e-05	1.57402e-05	2.09224e-05	2.17747e-05	1.04348e-05	N.D.	N.D.	N.D.	N.D.	N.D.	1.09469e-05	5.80355e-05	2.48556e-05	N.D.	N.D.	8.80223e-06	2.5991e-05	4.22187e-05	8.65814e-05	2.22392e-05	3.22605e-05	4.89528e-05	2.57453e-05	7.96273e-06	1.92542e-05
Isobutyrylcarnitine	Isobutyrylcarnitine	168379	HMDB0000736	232.154	N.D.	0.00023843	0.000331833	0.00032291	0.000978711	0.00140013	0.0019608	0.00143133	0.00292681	0.00184388	0.00166217	0.00315485	0.00934251	0.00573802	0.00642744	0.00759721	0.00262619	0.00281509	0.00342435	0.00316874	0.00218703	0.0015114	0.00197332	0.00189277	0.00200495	0.00276612	0.00424381	0.00280522	0.00286006	0.00203629	0.00175555	0.00456097	0.00709006	0.00545091	0.00742601	0.00762953	0.00138106	0.0014079	0.00145801	0.00101018
Isocitric acid	Isocitric acid	1198	HMDB0000193	191.019	N.D.	N.D.	N.D.	N.D.	N.D.	N.D.	0.000235911	N.D.	0.00214665	0.000789534	0.000292718	N.D.	0.000384345	0.000305251	N.D.	N.D.	N.D.	N.D.	N.D.	N.D.	0.000262698	0.000428679	0.000279875	N.D.	0.00181078	0.000428928	0.00026004	0.00038812	N.D.	N.D.	N.D.	N.D.	N.D.	0.000312379	N.D.	N.D.	N.D.	N.D.	N.D.	N.D.
Isoglutamic acid	Isoglutamic acid	73064		148.061	N.D.	0.000107251	N.D.	N.D.	0.00078949	0.00135809	0.00132123	0.000925231	N.D.	0.000246571	0.000210841	0.000213106	0.00245273	0.00163786	0.00125792	0.00193612	0.00175445	0.00131778	0.00156088	0.00209305	N.D.	N.D.	N.D.	N.D.	0.000740103	N.D.	0.000410832	0.000501943	N.D.	0.000177553	N.D.	N.D.	0.000744869	0.0012576	0.00205364	0.00221628	0.000906697	0.00037634	0.000421491	0.000479067
Isopropanolamine	Isopropanolamine	4	HMDB0012136	76.0757	N.D.	N.D.	N.D.	N.D.	N.D.	N.D.	N.D.	N.D.	N.D.	N.D.	N.D.	N.D.	N.D.	N.D.	N.D.	N.D.	N.D.	N.D.	N.D.	N.D.	N.D.	N.D.	N.D.	N.D.	N.D.	N.D.	N.D.	N.D.	N.D.	N.D.	N.D.	N.D.	0.00015732	0.000160293	0.000261874	0.000255047	N.D.	N.D.	N.D.	N.D.
Isovaleric acid Valeric acid DL-2-Methylbutyric acid	Isovaleric acid Valeric acid DL-2-Methylbutyric acid	10430 7991 8314	HMDB0000718 HMDB0000892 HMDB0002176	101.061	0.000858352	0.000128915	N.D.	N.D.	N.D.	0.000197108	0.001762	0.000252308	0.00095428	0.000144246	0.000136947	N.D.	0.0033872	0.000443141	0.00186943	0.000436632	N.D.	N.D.	N.D.	N.D.	0.000399133	0.000244185	0.000268731	0.000240231	0.00201016	0.00113021	0.000580569	0.00065249	0.000212998	0.000183355	0.000252446	0.000197514	0.00869481	0.00609847	0.0130987	0.0126239	N.D.	0.000180157	0.000158842	N.D.
Isovalerylcarnitine	Isovalerylcarnitine	6426851	HMDB0000688	246.17	N.D.	0.000186353	0.000246607	0.000259432	0.000698793	0.00096438	0.00303619	0.00102064	0.00254874	0.00136304	0.00107634	0.00268048	0.0126378	0.00397354	0.00728233	0.00781397	0.00150799	0.0016234	0.00207521	0.00177413	0.0028286	0.00180082	0.00262143	0.00250819	0.00504301	0.00555178	0.00451417	0.00496943	0.00273518	0.00193962	0.00159138	0.00456556	0.0126015	0.00977144	0.0148611	0.0151187	0.00110131	0.00106967	0.00114277	0.000855925
Kynurenic acid	Kynurenic acid	3845	HMDB0000715	188.035	N.D.	N.D.	N.D.	N.D.	N.D.	N.D.	2.26001e-06	N.D.	N.D.	N.D.	N.D.	N.D.	N.D.	N.D.	N.D.	N.D.	N.D.	N.D.	N.D.	N.D.	N.D.	N.D.	N.D.	N.D.	N.D.	N.D.	N.D.	N.D.	N.D.	N.D.	N.D.	2.19789e-06	5.06986e-06	1.06916e-05	1.39378e-05	8.26252e-06	N.D.	N.D.	N.D.	N.D.
Kynurenine	Kynurenine	846	HMDB0000684	209.092	0.0404056	0.00945641	0.0193774	0.0157372	0.0139406	0.00997577	0.00891311	0.0096352	0.0103527	0.01412	0.0105544	0.00994119	0.00519925	0.00488264	0.00419734	0.00356315	0.00465574	0.00503833	0.00519203	0.0054612	0.0177423	0.0157265	0.0163502	0.0113921	0.0532514	0.0312038	0.0175775	0.0257227	0.0846104	0.0634593	0.0312806	0.0536637	0.0148264	0.0146833	0.0198643	0.0205381	0.0134271	0.0148693	0.0171508	0.0163972
Lactic acid	Lactic acid	612	HMDB0000190,HMDB0001311	89.0243	0.734314	0.324558	0.419821	0.387309	0.487582	0.497368	0.476363	0.443768	0.75079	0.563783	0.594077	0.482541	0.446302	0.450522	0.470975	0.445307	0.539735	0.559665	0.588034	0.590564	0.303915	0.324199	0.351697	0.242011	0.744968	0.888447	0.447098	0.605905	0.344417	0.488508	0.452441	0.44556	0.467036	0.514875	0.585332	0.457446	0.534471	0.432595	0.450216	0.485568
Lauric acid	Lauric acid	3893	HMDB0000638	199.17	0.0465645	0.00756863	0.00681201	0.00495697	0.0206656	0.0089254	0.00646024	0.00602687	0.0566601	0.0099017	0.00638131	0.00711251	0.0157082	0.00607264	0.00566256	0.00338549	0.0120884	0.00670313	0.00394244	0.00305101	0.00825806	0.0104258	0.00637579	0.00361338	0.0327287	0.0133913	0.0124326	0.00720079	0.0116216	0.00761713	0.00760595	0.00692492	0.00820074	0.00788576	0.00695118	0.00480846	0.00591305	0.00500925	0.00629701	0.00307115
Lauroyl CoA_divalent	Lauroyl CoA	165436		473.634	N.D.	N.D.	N.D.	N.D.	N.D.	4.34716e-06	N.D.	N.D.	N.D.	N.D.	N.D.	N.D.	N.D.	N.D.	N.D.	N.D.	N.D.	N.D.	N.D.	N.D.	N.D.	N.D.	N.D.	N.D.	N.D.	N.D.	N.D.	N.D.	N.D.	N.D.	N.D.	N.D.	N.D.	N.D.	N.D.	N.D.	N.D.	N.D.	N.D.	N.D.
Lauroylcarnitine	Lauroylcarnitine	168381	HMDB0002250	344.28	N.D.	N.D.	N.D.	N.D.	5.69557e-05	0.000287933	0.00011669	4.74507e-05	N.D.	0.000169671	0.000134435	0.000124341	5.95803e-05	N.D.	N.D.	3.11527e-05	0.000132853	0.000128454	0.000206114	0.000128108	0.000184637	0.000118046	0.000137626	0.00013757	0.000906447	0.00101423	0.00069009	0.000856792	0.000242233	0.000359515	0.000421502	0.000285265	0.000307831	0.000423159	0.000350626	0.000732365	0.00105424	0.000853556	0.000749648	0.000838922
Leu	Leu	857	HMDB0000687	132.102	1.67878	0.566121	0.747161	0.739666	0.706942	0.794045	0.738588	0.789699	1.39041	0.835023	0.75821	0.727771	0.771195	0.536982	0.567281	0.499438	0.689291	0.608305	0.577445	0.62873	0.512956	0.664982	0.711339	0.558701	1.43291	0.861913	0.742814	0.832845	0.743473	0.789714	0.66156	0.712383	0.582565	0.626066	0.850152	0.700877	0.533781	0.41408	0.478523	0.407744
Leu-Leu-Tyr	Leu-Leu-Tyr	88513		408.249	N.D.	N.D.	N.D.	N.D.	2.50448e-05	N.D.	N.D.	N.D.	N.D.	N.D.	N.D.	N.D.	N.D.	2.54607e-05	N.D.	N.D.	2.835e-05	N.D.	N.D.	N.D.	N.D.	N.D.	N.D.	N.D.	N.D.	3.82418e-05	1.6144e-05	N.D.	N.D.	N.D.	N.D.	N.D.	2.12464e-05	1.78514e-05	N.D.	N.D.	N.D.	N.D.	N.D.	N.D.
Lidocaine	Lidocaine	3676		235.181	0.00029974	8.05585e-05	0.000112685	9.15545e-05	0.000215538	0.000227458	0.000179711	0.000178834	0.0120468	0.0110283	0.0125343	0.0112779	5.47623e-05	2.38245e-05	2.26676e-05	2.58425e-05	N.D.	N.D.	N.D.	N.D.	8.13039e-05	8.75586e-05	0.000135994	9.55076e-05	0.000348258	0.0002813	0.000334133	0.000202798	0.00395079	0.00488596	0.00477592	0.00624304	1.88356e-05	1.10881e-05	1.67994e-05	2.6461e-05	N.D.	N.D.	N.D.	N.D.
Loperamide	Loperamide	3955	HMDB0004999	477.232	N.D.	2.23147e-05	1.44352e-05	4.31599e-05	4.76699e-05	3.36503e-05	2.90339e-05	6.9825e-05	N.D.	2.04664e-05	3.51823e-05	3.50031e-05	N.D.	4.24415e-05	2.69203e-05	1.21704e-05	N.D.	N.D.	9.27669e-06	N.D.	N.D.	1.76279e-05	N.D.	1.41048e-05	N.D.	N.D.	9.10952e-06	1.25321e-05	N.D.	7.71059e-06	N.D.	1.20019e-05	2.60849e-05	1.8243e-05	N.D.	N.D.	1.76979e-05	1.70846e-05	2.67749e-05	1.6582e-05
Lumazine	Lumazine	10250		165.041	0.00014788	1.60877e-05	N.D.	N.D.	7.23838e-05	1.93236e-05	1.29393e-05	3.23406e-05	0.000288296	N.D.	N.D.	2.82561e-05	0.00012993	N.D.	3.73404e-05	N.D.	N.D.	N.D.	N.D.	4.99753e-05	N.D.	4.20645e-05	N.D.	N.D.	N.D.	N.D.	N.D.	1.2545e-05	N.D.	1.61725e-05	1.82959e-05	N.D.	N.D.	N.D.	N.D.	N.D.	N.D.	3.36974e-05	3.08888e-05	N.D.
Lys	Lys	866	HMDB0000182,HMDB0003405	147.113	1.31225	0.469822	0.706422	0.572118	0.73608	0.637037	0.646635	0.665222	1.11514	0.725843	0.697362	0.629166	0.574859	0.374319	0.364023	0.307642	0.390544	0.381195	0.323059	0.337278	0.411674	0.5028	0.448925	0.321924	0.632476	0.446963	0.388703	0.434686	0.332223	0.34992	0.398069	0.329027	0.418823	0.391362	0.451543	0.365012	0.258755	0.238281	0.289814	0.226249
Lysinamide	Lysinamide	439605		146.129	N.D.	N.D.	N.D.	N.D.	N.D.	N.D.	3.24957e-05	N.D.	N.D.	N.D.	N.D.	N.D.	N.D.	N.D.	N.D.	N.D.	N.D.	N.D.	N.D.	N.D.	N.D.	N.D.	N.D.	N.D.	0.000111651	N.D.	1.64774e-05	N.D.	N.D.	N.D.	N.D.	N.D.	N.D.	N.D.	1.26206e-05	9.24909e-06	N.D.	N.D.	N.D.	N.D.
Malic acid	Malic acid	525	HMDB0000156,HMDB0000744	133.014	0.189441	0.0795363	0.11873	0.101285	0.154867	0.136035	0.133293	0.132131	0.181738	0.106599	0.0987908	0.0930089	0.218446	0.116412	0.137486	0.11046	0.0745433	0.0839647	0.0760563	0.0635346	0.0708748	0.072675	0.0645608	0.0488907	0.110029	0.0859216	0.0676563	0.0712543	0.0545986	0.0685746	0.0611099	0.0687612	0.142773	0.152217	0.174967	0.143331	0.0719229	0.0643788	0.0785538	0.0611048
Malonylcarnitine	Malonylcarnitine	22833583	HMDB0002095	248.113	0.000335214	0.000131322	0.000171492	0.000148776	0.000196801	0.000294988	0.000228314	0.000183878	0.000390579	0.000358386	0.000291268	0.000352429	0.000246194	0.000238827	0.00021248	0.000249016	0.000754624	0.000631308	0.000606427	0.000684515	9.80174e-05	7.00949e-05	9.14488e-05	6.27264e-05	0.000184619	0.000338023	0.000284918	0.000192383	0.000149499	0.000181279	0.000128137	0.000237277	0.000171126	0.000215761	0.000151633	0.000191952	0.000407871	0.000268858	0.000304419	0.000231833
Mandelic acid o-Hydroxyphenylacetic acid p-Anisic acid-2 Phenoxyacetic acid 2-(Hydroxymethyl)benzoic acid	Mandelic acid 2-HPAA p-Anisic acid Phenoxyacetic acid 2-(Hydroxymethyl)benzoic acid	11914 11970 7478 19188 11920	HMDB0000703 HMDB0000669 HMDB0001101 HMDB0032594	151.04	N.D.	N.D.	N.D.	N.D.	0.000255438	0.000211243	0.000253125	0.000223929	N.D.	0.000149195	0.000136254	N.D.	N.D.	0.000135331	0.000114755	0.00013987	N.D.	0.000136365	N.D.	N.D.	N.D.	N.D.	N.D.	N.D.	N.D.	0.000256195	0.000216418	0.000213554	N.D.	N.D.	0.000111049	N.D.	N.D.	N.D.	N.D.	0.000130981	N.D.	N.D.	N.D.	N.D.
Melamine	Melamine	7955		127.073	N.D.	N.D.	N.D.	N.D.	N.D.	N.D.	N.D.	N.D.	N.D.	0.000156686	N.D.	0.000134134	N.D.	N.D.	N.D.	N.D.	N.D.	N.D.	N.D.	N.D.	0.000758089	0.000170936	N.D.	N.D.	N.D.	0.000226343	N.D.	N.D.	N.D.	N.D.	0.00012277	N.D.	N.D.	0.000137675	N.D.	N.D.	N.D.	0.000196065	N.D.	N.D.
Met	Met	876	HMDB0000696	150.058	0.352157	0.136904	0.142015	0.178711	0.137511	0.171243	0.128091	0.171785	0.271348	0.143731	0.177041	0.144514	0.156643	0.121834	0.134307	0.0901407	0.110751	0.114428	0.0978437	0.101764	0.124717	0.142002	0.160507	0.119214	0.186647	0.10074	0.11016	0.0984688	0.0996327	0.115583	0.106622	0.10106	0.101151	0.0949512	0.0883541	0.105903	0.0928722	0.0816514	0.100999	0.0795966
Methionine sulfoxide	Methionine sulfoxide	158980	HMDB0002005	166.053	0.0119362	0.00398361	0.00904927	0.00270247	0.00385028	0.00180402	0.0064793	0.00191575	0.0054015	0.00803861	0.00358886	0.00505763	0.00482969	0.00205537	0.00154126	0.00347015	0.00360715	0.00283318	0.00289375	0.00576453	0.00405989	0.00300783	0.00405281	0.00454462	0.00606144	0.00739256	0.00690849	0.0063979	0.00490022	0.00723425	0.00812532	0.00569578	0.00214826	0.00321568	0.00561754	0.00231791	0.00154888	0.00270246	0.00134581	0.001529
Methyl sulfate	Methyl sulfate	6412		110.976	N.D.	9.4785e-05	N.D.	N.D.	N.D.	N.D.	N.D.	N.D.	N.D.	N.D.	N.D.	N.D.	N.D.	N.D.	N.D.	N.D.	N.D.	N.D.	N.D.	N.D.	N.D.	N.D.	N.D.	N.D.	N.D.	N.D.	N.D.	N.D.	N.D.	N.D.	N.D.	N.D.	N.D.	N.D.	N.D.	N.D.	N.D.	N.D.	N.D.	N.D.
Methylguanidine	Methylguanidine	10111	HMDB0001522	74.0713	N.D.	7.53071e-06	N.D.	N.D.	N.D.	N.D.	N.D.	N.D.	N.D.	N.D.	N.D.	1.24327e-05	3.24071e-05	0.000206229	2.38769e-05	3.84428e-05	N.D.	3.04523e-05	N.D.	2.01467e-05	N.D.	0.00189645	N.D.	1.97643e-05	N.D.	N.D.	1.76543e-05	3.68155e-05	N.D.	N.D.	1.43262e-05	2.41715e-05	2.17308e-05	1.8712e-05	2.96482e-05	3.05225e-05	N.D.	N.D.	0.000112018	N.D.
Mevalonic acid	Mevalonic acid	134965	HMDB0000227	147.066	0.000143677	2.10625e-05	2.15329e-05	1.64448e-05	3.33128e-05	2.53935e-05	2.12929e-05	2.02854e-05	3.67542e-05	3.3766e-05	1.77204e-05	1.83433e-05	4.43649e-05	2.71885e-05	2.92272e-05	1.65666e-05	1.88406e-05	1.52771e-05	7.44704e-06	1.01241e-05	3.30494e-05	4.00488e-05	1.7588e-05	3.12155e-05	8.61878e-05	6.07579e-05	4.98747e-05	2.72727e-05	3.11745e-05	3.55044e-05	2.43963e-05	2.56001e-05	4.78664e-05	5.4747e-05	7.28044e-05	6.45157e-05	2.38036e-05	2.10802e-05	2.43321e-05	2.44895e-05
Morpholine	Morpholine	8083	HMDB0031581	88.0757	0.00536751	0.000864989	0.000931335	0.000793917	0.00120157	0.000809312	0.000859191	0.00106062	N.D.	0.00140445	0.00113558	0.0010968	0.00184396	0.00101435	0.000896069	0.000607529	0.00204141	0.001343	0.00124769	0.00122676	N.D.	0.000923746	N.D.	N.D.	N.D.	0.00148599	0.000914147	0.000879901	N.D.	0.000525366	0.000623049	0.00052608	0.000765096	0.000749333	N.D.	N.D.	0.000838128	0.000876234	0.000691083	N.D.
Muramic acid	Muramic acid	441038	HMDB0003254	252.109	N.D.	9.99053e-05	N.D.	0.000123365	N.D.	6.20044e-05	0.000310732	N.D.	N.D.	N.D.	3.64136e-05	2.54787e-05	N.D.	N.D.	N.D.	N.D.	N.D.	8.59981e-05	4.3603e-05	N.D.	N.D.	5.61555e-05	2.97402e-05	N.D.	N.D.	7.87447e-05	N.D.	0.000118887	N.D.	1.91225e-05	N.D.	1.80206e-05	N.D.	3.74736e-05	1.86487e-05	0.000137557	2.06881e-05	N.D.	5.84826e-05	6.3839e-05
Muscimol	Muscimol	4266		115.05	N.D.	7.58663e-05	0.000124637	0.000138454	0.000202457	0.000227926	0.000166996	0.000197488	N.D.	0.000211832	0.000167926	0.000145064	N.D.	0.000121356	0.000113069	0.000102716	N.D.	0.000157861	0.000138981	0.000152779	0.000124708	N.D.	0.000139871	0.000119271	N.D.	0.000181638	0.000215641	0.000190434	0.000182687	0.000198935	0.000146835	0.000187226	0.000148038	0.000145983	0.00014115	0.000195912	0.000144536	0.000145256	0.000148356	0.000166182
myo-Inositol 1-phosphate myo-Inositol 3-phosphate	Myoinositol 1-phosphate Myoinositol 3-phosphate	107737 440194	HMDB0000213 HMDB0006814	259.022	0.0336866	0.0147508	0.0199089	0.0191268	0.0145775	0.0199297	0.0207284	0.0150734	0.0216181	0.0297387	0.0309416	0.0291513	0.0192662	0.0179051	0.020615	0.0192392	0.0266201	0.02864	0.0338418	0.0315538	0.0106487	0.00599861	0.0115921	0.00987229	0.00772341	0.00305038	0.00855405	0.00594116	0.00618257	0.00420371	0.0123342	0.0131438	0.00853153	0.00921162	0.00635228	0.00884482	0.0243403	0.0187064	0.0185261	0.0239135
myo-Inositol 2-phosphate	Myoinositol 2-phosphate	160886		259.022	0.0397348	0.017475	0.018678	0.0200576	0.0109938	0.013201	0.0120605	0.0101459	0.0425275	0.0268053	0.0261267	0.0245231	0.0189624	0.0102347	0.0158379	0.0107295	0.0097869	0.0134001	0.012029	0.0121721	0.00619219	0.00499557	0.00639651	0.00370616	0.00539476	0.00261192	0.00297625	0.0031252	0.00289597	0.00246764	0.00522987	0.00547404	0.00783215	0.00810843	0.00572461	0.00545155	0.00518107	0.00581566	0.00729184	0.00507579
Myristic acid	Myristic acid	11005	HMDB0000806	227.201	0.00864783	0.00361834	0.00389761	0.00191293	0.00920513	0.00604112	0.00474561	0.00372192	0.00793887	0.00545227	0.00554317	0.00359094	0.00331846	0.00151956	0.00167737	0.000932512	0.00292587	0.00297057	0.00246513	0.00196711	0.00631534	0.00727	0.00599058	0.00415882	0.0148967	0.0086875	0.00672338	0.00481962	0.00930337	0.00864839	0.00584493	0.00628978	0.00392601	0.00433469	0.00454664	0.00313913	0.00332749	0.00285741	0.00414985	0.0018036
Myristoleic acid	Myristoleic acid	5281119	HMDB0002000	225.186	0.00247696	0.00105998	0.00174729	0.00131621	0.0015122	0.00211581	0.00197252	0.00139332	0.00220881	0.00200599	0.00218797	0.00196559	0.00100054	0.000814685	0.00089927	0.000524663	0.000687365	0.000722944	0.000755132	0.000554453	0.00301718	0.00267372	0.00240007	0.00236491	0.00359976	0.00176704	0.00251046	0.00226951	0.00504471	0.00460004	0.00416579	0.00454087	0.00208558	0.00199938	0.00362464	0.00243716	0.00104168	0.00137644	0.00181402	0.0013253
N,N-Dimethylglycine	DMG	673	HMDB0000092	104.071	0.00334418	0.00126537	0.00169307	0.00146982	0.00252062	0.00257041	0.00244453	0.00254232	0.00452701	0.00406609	0.00361225	0.00352411	0.00334173	0.00274273	0.00281047	0.00315945	0.00157134	0.00166684	0.00169177	0.00182244	0.00110458	0.00128119	0.00154667	0.00112328	0.00345826	0.0029623	0.00286625	0.00262869	0.00325105	0.00304537	0.00325416	0.00332699	0.00289899	0.00360639	0.00396183	0.00370418	0.00205875	0.00171992	0.00175114	0.00158556
N-Acetylalanine	N-Acetylalanine	88064	HMDB0000766	130.051	0.00305488	0.00162803	0.00216925	0.0020805	0.00159362	0.00178055	0.00158336	0.00165123	0.00165836	0.0011932	0.00144912	0.00128891	0.00114546	0.00129558	0.00122509	0.000988558	0.000906677	0.0010944	0.00102288	0.000939907	0.00112079	0.00112954	0.000986662	0.000974447	0.00126124	0.00118084	0.00113416	0.00133313	0.00130111	0.0014895	0.00115207	0.00158196	0.00155828	0.00145511	0.00168063	0.0012924	0.0009661	0.000766047	0.00092477	0.00100512
N-Acetylasparagine	N-Acetylasparagine	99715	HMDB0006028	173.056	N.D.	8.80529e-06	1.79747e-05	1.0315e-05	N.D.	1.1904e-05	4.52002e-06	9.15237e-06	N.D.	N.D.	4.27099e-06	2.24708e-06	N.D.	6.03631e-06	4.25863e-06	3.5347e-06	N.D.	3.22813e-06	N.D.	N.D.	1.51864e-05	1.848e-05	1.44568e-05	5.67944e-06	2.39e-05	N.D.	1.24104e-05	1.23961e-05	2.21797e-05	1.35194e-05	1.38715e-05	1.34024e-05	4.11293e-05	2.35185e-05	4.83462e-05	4.50902e-05	1.06404e-05	N.D.	3.22965e-06	3.72099e-06
N-Acetylaspartic acid	N-Acetylaspartic acid	65065	HMDB0000812	174.04	0.00464504	0.00216116	0.00300968	0.00232319	0.00783607	0.00798617	0.00731722	0.00651774	0.00508622	0.00394388	0.00385766	0.0038229	0.00417132	0.00385038	0.00404207	0.00375963	0.00510741	0.00630619	0.00572951	0.00549563	0.00257685	0.00260284	0.0030642	0.0025832	0.00681928	0.0067902	0.00938901	0.00708912	0.00476434	0.00620042	0.00352985	0.00750318	0.00746021	0.00497275	0.00554659	0.00609242	0.00524627	0.00607197	0.00552739	0.00533293
N-Acetylcysteine	N-Acetylcysteine	12035	HMDB0001890	162.023	0.000663726	7.15905e-05	5.79409e-05	2.38642e-05	0.000142527	6.08142e-05	6.33527e-05	5.35136e-05	3.97103e-05	6.62828e-05	5.38703e-05	9.97801e-05	0.000116896	5.4237e-05	2.52692e-05	9.54285e-06	8.0189e-05	5.77887e-05	2.63219e-05	2.99936e-05	6.19013e-05	0.000120573	5.41027e-05	5.81924e-05	0.000327877	0.000145431	7.71529e-05	4.06786e-05	7.25005e-05	6.43965e-05	0.00012912	7.08409e-05	3.7954e-05	5.09442e-05	4.10256e-05	3.93038e-05	2.60719e-05	5.21411e-05	4.57541e-05	2.70537e-05
N-Acetylglucosamine 1-phosphate	GlcNAc-P	440272	HMDB0001367	300.049	0.013465	0.00509935	0.00740903	0.00633954	0.00429042	0.00411812	0.00422448	0.00351986	0.0103119	0.00761326	0.00778849	0.00642585	0.00513642	0.00304834	0.00442773	0.00279309	0.00817137	0.00952521	0.00745948	0.00844575	0.00774878	0.00859333	0.00621813	0.00762615	0.00942993	0.00741535	0.0058436	0.00648868	0.00782639	0.007742	0.00851875	0.00881263	0.00647771	0.00616236	0.00805951	0.00775313	0.00625689	0.00594457	0.00652509	0.00785132
N-Acetylglucosamine 6-phosphate	NAcGlcNP	440996	HMDB0001062	300.049	0.00356834	0.00241384	0.00243892	0.00208511	0.0031108	0.00388135	0.00306607	0.00223539	0.0109481	0.00808459	0.00710402	0.00625412	0.00761365	0.00467182	0.00597351	0.00403798	0.00533292	0.00604365	0.00495509	0.00546577	0.00611349	0.00799439	0.00499622	0.00512274	0.00884391	0.010657	0.00402492	0.00546056	0.00448267	0.00587678	0.00428732	0.00586756	0.00749168	0.00848725	0.011956	0.00950023	0.00496827	0.00430328	0.0047933	0.0052532
N-Acetylglucosamine N-Acetylmannosamine N-Acetylgalactosamine	GlcNAc ManNAc N-Acetylgalactosamine	439174 439281 35717	HMDB0000215 HMDB0001129 HMDB0000853	222.097	0.0336173	0.0157932	0.0214342	0.0184751	0.0228155	0.0177851	0.0202275	0.0197799	0.0376981	0.0233572	0.0209119	0.0196368	0.020453	0.00899164	0.0129883	0.00706997	0.0125176	0.0132479	0.0122456	0.0119102	0.0131821	0.0183019	0.0210477	0.0173939	0.0155666	0.0146871	0.01796	0.0136122	0.0133398	0.0157406	0.0114289	0.0121092	0.0126813	0.0116347	0.00986562	0.00960015	0.0170971	0.0138254	0.0159445	0.0166089
N-Acetylglucosylamine	N-Acetylglucosylamine	439454	HMDB0001104	221.113	0.000323188	0.000930782	0.00129922	0.00115786	0.000869836	0.0011791	0.000889298	0.000891328	0.0013249	0.00099411	0.00110098	0.000997971	8.93202e-05	0.000578369	0.000545131	0.000383944	0.00053136	0.000480988	0.000469024	0.000408792	0.000919893	0.000804954	0.000815172	0.00084276	0.000500176	0.000620872	0.000716112	0.000275778	0.000821903	0.00124426	0.000678184	0.000853517	0.000505104	0.000445264	0.000511716	0.000397583	0.000700251	0.000668725	0.000811172	0.00081759
N-Acetylglutamic acid	N-AcGlu	70914	HMDB0001138	188.056	0.000322657	0.00016388	0.000242697	0.000205579	0.000233776	0.000203332	0.000304664	0.00020287	0.000261024	0.000203144	0.000207225	0.000177036	0.000231378	0.000214644	0.000235007	0.000208543	0.000109196	0.000176103	0.000145867	0.000146457	0.000184036	0.000187625	0.000162684	0.000163417	0.000292674	0.000283794	0.0002876	0.00032633	0.000208492	0.00022912	0.000143303	0.000231078	0.000309189	0.000335975	0.000438034	0.000411128	0.000209369	0.000225014	0.000230601	0.000205608
N-Acetylglutamine	N-Acetylglutamine	25561	HMDB0006029	187.072	3.8426e-05	1.54821e-05	2.49411e-05	1.66604e-05	3.00582e-05	2.77644e-05	5.32334e-05	4.74151e-05	2.73932e-05	1.92095e-05	1.27991e-05	9.04455e-06	2.68684e-05	2.10141e-05	2.82189e-05	1.71833e-05	1.39625e-05	1.26728e-05	1.55418e-05	8.52864e-06	1.60148e-05	2.77348e-05	2.13559e-05	1.53302e-05	4.55418e-05	3.02082e-05	4.29285e-05	3.80165e-05	1.95138e-05	2.8095e-05	1.66722e-05	2.28567e-05	3.10445e-05	3.55076e-05	4.06639e-05	4.1343e-05	2.06337e-05	1.73542e-05	1.69411e-05	1.93672e-05
N-Acetylglycine	N-Acetylglycine	10972	HMDB0000532	116.035	0.0001883	8.50747e-05	9.21601e-05	9.41713e-05	0.000192684	0.000164743	0.000171276	0.000173783	0.000437269	0.000317467	0.000304969	0.00032332	0.000135101	0.00014549	0.000152862	0.000149217	0.000254688	0.000361483	0.000343164	0.000284861	8.18441e-05	8.09898e-05	7.48989e-05	6.95067e-05	0.000181917	0.000166946	0.000158776	0.00015247	0.000242371	0.00025164	0.000301942	0.000298459	0.000169526	0.000189891	0.000217909	0.000198433	0.0003484	0.000365431	0.000376098	0.000360483
N-Acetylhistidine	N-Acetylhistidine	75619		198.087	0.000134595	3.32571e-05	9.29118e-05	7.85149e-05	9.47917e-05	0.0001064	9.07935e-05	8.25698e-05	0.00010972	9.17639e-05	8.25793e-05	9.79039e-05	0.000101308	0.000102808	6.70354e-05	9.72182e-05	0.000104868	4.9159e-05	8.07487e-05	7.72818e-05	8.1257e-05	9.08177e-05	0.000113428	9.93247e-05	0.000225919	0.000218311	0.000176904	0.000180625	0.000298255	0.000350991	0.000207506	0.000258429	0.000130948	0.000133279	0.000151207	0.000181326	0.00012788	0.00011387	0.000125471	0.000132031
N-Acetylleucine Isovalerylalanine	N-Acetylleucine Isovalerylalanine	70912 129285	HMDB0011756 HMDB0000747	172.098	0.000223593	3.72905e-05	8.02534e-06	N.D.	9.32155e-05	4.7452e-05	8.46746e-05	4.62903e-05	0.000158915	3.59203e-05	1.77325e-05	N.D.	9.01415e-05	1.57615e-05	1.51449e-05	9.60308e-06	7.99685e-05	4.20788e-05	N.D.	8.1938e-06	1.25099e-05	6.69073e-05	9.04366e-06	8.55536e-06	0.000182393	6.56612e-05	9.11528e-05	5.85487e-05	N.D.	N.D.	1.54798e-05	9.26599e-06	6.12535e-05	5.50061e-05	6.83331e-05	5.5657e-05	N.D.	N.D.	6.42828e-06	N.D.
N-Acetyllysine	N-Acetyllysine	92907	HMDB0000446	189.123	0.0591692	0.0199625	0.0136475	0.0070783	0.0270762	0.011617	0.0060441	0.0046167	0.0799824	0.0156287	0.00504118	0.00238907	0.0519309	0.0278505	0.0138468	0.0134676	0.0433927	0.026065	0.0140062	0.0134471	0.00876714	0.0118094	0.00831468	0.00238023	0.0505745	0.037168	0.0229212	0.00835904	0.0230321	0.00967631	0.00179988	0.00293754	0.0190606	0.0253112	0.0101139	0.00698328	0.0281061	0.0169701	0.012175	0.00432658
N-Acetylmethionine	N-Acetylmethionine	448580	HMDB0011745	190.054	0.00287792	0.00156838	0.00190025	0.0018394	0.00135287	0.00120234	0.0012371	0.00132917	0.00158689	0.00123938	0.00146257	0.00114746	0.00100673	0.000913811	0.000905856	0.000728463	0.000781747	0.00108056	0.00101067	0.000813875	0.000885032	0.00109943	0.000933001	0.000794081	0.000749881	0.000746096	0.000554631	0.000776189	0.00062039	0.000846788	0.000589617	0.000800844	0.000985531	0.0010351	0.00122592	0.000833478	0.00043644	0.000413943	0.00056068	0.000495723
N-Acetylmuramic acid	N-Acetylmuramic acid	5462244		292.103	N.D.	N.D.	N.D.	4.23564e-06	N.D.	N.D.	N.D.	N.D.	N.D.	N.D.	7.53449e-06	1.06483e-05	2.26713e-05	1.82093e-05	2.50048e-05	2.24584e-05	5.95295e-06	8.74287e-06	N.D.	8.67746e-06	N.D.	N.D.	N.D.	N.D.	N.D.	N.D.	N.D.	N.D.	N.D.	5.79718e-06	N.D.	1.34042e-05	5.06438e-05	4.53906e-05	5.7533e-05	6.38837e-05	N.D.	N.D.	N.D.	N.D.
N-Acetylneuraminic acid	NeuNAc	439197	HMDB0000230	308.098	0.0802546	0.0318878	0.0499848	0.0396872	0.0592412	0.0609316	0.0397496	0.0540356	0.125616	0.0566738	0.0492051	0.0575847	0.0279402	0.0164441	0.0268796	0.0172641	0.0384077	0.0494734	0.0478515	0.0473949	0.0435126	0.0308928	0.044559	0.0471147	0.012668	0.00953308	0.0295618	0.0227906	0.0121886	0.0215721	0.0180536	0.0340001	0.0155558	0.0230412	0.0125296	0.0141946	0.0400302	0.0444119	0.0512029	0.0464099
N-Acetylornithine	N-AcOrn	439232	HMDB0003357	175.108	0.00528488	0.00215919	0.002431	0.00194676	0.00226108	0.00228265	0.00236667	0.00156035	0.00312406	0.0016396	0.00127169	0.000849861	0.00943964	0.00535937	0.0046189	0.00533976	0.00360449	0.0025807	0.00263601	0.00290696	0.00101918	0.00117875	0.00122788	0.000776116	0.00586169	0.00576229	0.00253246	0.00288873	0.00224242	0.00158232	0.000508797	0.00106696	0.00349917	0.00292522	0.00254667	0.00290884	0.00300519	0.00244666	0.00195149	0.0015438
N-Acetylphenylalanine	N-Acetylphenylalanine	74839	HMDB0000512	206.082	N.D.	N.D.	N.D.	N.D.	N.D.	5.0293e-06	N.D.	N.D.	N.D.	N.D.	N.D.	N.D.	N.D.	3.42344e-06	N.D.	4.33219e-06	N.D.	N.D.	N.D.	N.D.	8.92035e-06	9.07643e-06	7.94122e-06	5.32667e-06	4.09807e-05	1.26201e-05	1.70959e-05	9.97675e-06	7.85913e-06	N.D.	N.D.	N.D.	N.D.	2.45193e-05	2.88808e-05	2.65027e-05	N.D.	N.D.	N.D.	N.D.
N-Acetylputrescine	N-Acetylputrescine	122356	HMDB0002064	131.118	0.00364941	0.00119682	0.00182332	0.00159898	0.00873753	0.00891856	0.0321694	0.0116951	0.000121366	0.000102553	8.52373e-05	7.87656e-05	0.0244955	0.00708959	0.0110842	0.00884151	0.00025224	0.000183782	0.000224284	0.000208416	0.00268561	0.00194061	0.002401	0.0028511	0.125424	0.0400009	0.0531955	0.0439612	0.000149614	0.000123585	0.000103948	0.000192091	0.0256479	0.0252076	0.0434618	0.039596	0.000550458	0.000461358	0.00055345	0.000596058
N-Acetylserine	N-Acetylserine	65249	HMDB0002931	148.061	0.00576443	0.00266057	0.00355137	0.00344629	0.00293471	0.00247466	0.00223729	0.00244938	0.00469803	0.00310563	0.00323608	0.00312267	0.00171651	0.00138167	0.00145275	0.00120683	0.00168873	0.00139213	0.00159183	0.00171259	0.00319969	0.00296715	0.00301693	0.00286391	0.00447277	0.00412098	0.00420919	0.00411722	0.00392058	0.004462	0.00335315	0.00358047	0.00331282	0.00270131	0.00311971	0.00340683	0.00235516	0.00270299	0.00271398	0.00221311
N-Acetyltryptophan	N-Acetyltryptophan	439917		245.093	2.76533e-05	9.32933e-06	N.D.	N.D.	N.D.	N.D.	N.D.	N.D.	N.D.	N.D.	N.D.	N.D.	3.30418e-05	1.2711e-05	N.D.	N.D.	1.74799e-05	N.D.	N.D.	N.D.	N.D.	N.D.	N.D.	N.D.	6.56333e-05	N.D.	N.D.	N.D.	N.D.	3.58511e-06	N.D.	2.26541e-06	1.33454e-05	6.64643e-06	8.36134e-06	N.D.	N.D.	N.D.	N.D.	N.D.
N-Acetyltyrosine	N-Acetyltyrosine	68310	HMDB0000866	222.077	N.D.	N.D.	N.D.	N.D.	N.D.	N.D.	N.D.	N.D.	N.D.	N.D.	N.D.	N.D.	N.D.	3.757e-06	N.D.	N.D.	N.D.	N.D.	N.D.	N.D.	4.99235e-06	5.48589e-06	N.D.	4.62672e-06	1.48096e-05	5.90712e-06	8.20937e-06	N.D.	N.D.	4.66723e-06	4.68295e-06	N.D.	3.64705e-06	1.22858e-05	9.68611e-06	7.76301e-06	N.D.	N.D.	N.D.	N.D.
N-Carbamoylaspartic acid	Carbamoyl-Asp	93072	HMDB0000828	175.036	4.49315e-05	1.88107e-05	2.38613e-05	1.62574e-05	0.000156965	0.000157119	7.46734e-05	6.4097e-05	N.D.	3.47041e-05	3.49743e-05	3.0276e-05	8.88309e-06	3.2997e-05	3.04998e-05	2.71623e-05	N.D.	1.05246e-05	1.2071e-05	N.D.	5.70047e-05	5.0749e-05	7.22285e-05	5.48746e-05	0.000111568	9.93762e-05	0.00015317	0.000131175	0.000289716	0.000376696	0.000300833	0.000404337	0.000236795	0.000287692	0.000452113	0.000287088	6.5092e-05	0.000170737	0.000184407	0.000148537
N-Carbamylglutamic acid	N-Carbamylglutamic acid	121396		189.051	N.D.	N.D.	N.D.	N.D.	N.D.	N.D.	N.D.	N.D.	N.D.	4.75877e-06	2.10515e-06	N.D.	N.D.	N.D.	N.D.	N.D.	N.D.	N.D.	N.D.	N.D.	N.D.	N.D.	N.D.	N.D.	N.D.	N.D.	N.D.	N.D.	N.D.	N.D.	N.D.	N.D.	N.D.	4.69075e-06	N.D.	N.D.	N.D.	N.D.	N.D.	N.D.
N-Ethylglycine	N-Ethylglycine	316542		104.071	N.D.	N.D.	N.D.	N.D.	N.D.	0.000222124	N.D.	N.D.	N.D.	0.000340486	0.000348458	0.000396399	N.D.	N.D.	N.D.	N.D.	N.D.	N.D.	N.D.	N.D.	N.D.	N.D.	N.D.	N.D.	N.D.	N.D.	N.D.	N.D.	N.D.	0.000275573	0.000248808	0.00027677	N.D.	N.D.	N.D.	N.D.	N.D.	N.D.	N.D.	N.D.
N-Ethylmaleimide_+H2O	N-Ethylmaleimide_+H2O	4362		144.066	0.00375209	0.000896762	0.000975623	0.000865324	0.00187482	0.000903682	0.000892353	0.000946671	0.00521034	0.00126149	0.000796214	0.000910694	0.00214839	0.000740709	0.000778162	0.000488137	0.00156154	0.000834187	0.000742375	0.000759079	0.000756559	0.00121502	0.00100032	0.000709899	0.00200374	0.00159219	0.00103451	0.000757303	0.00094358	0.000784878	0.000706635	0.000598808	0.000944012	0.000726401	N.D.	0.000520073	0.000883476	0.000868167	0.000681212	0.000637203
N-Formylglycine	N-Formylglycine	75606		102.019	8.5496e-05	2.60205e-05	N.D.	N.D.	3.68972e-05	N.D.	N.D.	N.D.	N.D.	7.26615e-06	6.74203e-06	N.D.	N.D.	N.D.	N.D.	N.D.	N.D.	N.D.	N.D.	N.D.	N.D.	2.21161e-05	N.D.	6.76556e-06	N.D.	N.D.	N.D.	N.D.	N.D.	N.D.	1.7839e-05	4.84711e-06	N.D.	1.32845e-05	N.D.	N.D.	N.D.	1.11411e-05	N.D.	N.D.
N-Formylmethionine	N-Formylmethionine	439750	HMDB0001015	176.038	0.000114303	6.04296e-05	6.75942e-05	7.23765e-05	5.91272e-05	7.4442e-05	5.41759e-05	6.81564e-05	6.47139e-05	6.71436e-05	7.79408e-05	5.87614e-05	7.3867e-05	7.28947e-05	7.64168e-05	6.57719e-05	7.18177e-05	8.41771e-05	7.92478e-05	8.06817e-05	4.81979e-05	3.47196e-05	3.80538e-05	3.77304e-05	9.81153e-05	0.000122315	9.40765e-05	0.000132024	6.16773e-05	6.03949e-05	6.38703e-05	8.61303e-05	0.000185928	0.000100704	0.000196085	0.000194619	9.72047e-05	6.70175e-05	9.22371e-05	8.35383e-05
N-Glycolylneuraminic acid	GcNeu	440001	HMDB0000833	324.095	N.D.	9.58688e-06	1.12563e-05	1.4992e-05	N.D.	5.66531e-06	8.54079e-06	1.47832e-05	N.D.	N.D.	N.D.	N.D.	N.D.	N.D.	N.D.	N.D.	N.D.	N.D.	N.D.	N.D.	1.48502e-05	1.07002e-05	2.13897e-05	1.95169e-05	N.D.	1.39108e-05	6.8185e-06	2.13878e-05	3.17709e-05	4.11999e-05	8.46914e-06	3.04792e-05	2.26231e-05	1.30735e-05	2.18952e-05	1.85231e-05	1.40533e-05	N.D.	5.25917e-06	5.16746e-06
N-Methylalanine	N-Methylalanine	5288725		104.071	N.D.	0.000129242	N.D.	N.D.	N.D.	0.000213768	0.000231097	0.000249271	N.D.	N.D.	N.D.	N.D.	N.D.	N.D.	N.D.	0.000153572	N.D.	N.D.	N.D.	N.D.	N.D.	N.D.	N.D.	N.D.	N.D.	N.D.	0.00035108	0.000276475	N.D.	N.D.	N.D.	N.D.	0.000187168	N.D.	0.000257161	0.00029049	N.D.	N.D.	0.000136472	N.D.
N-Methylaspartic acid	N-Methylaspartic acid	22880	HMDB0002393	148.06	N.D.	N.D.	N.D.	N.D.	N.D.	N.D.	N.D.	N.D.	N.D.	N.D.	N.D.	N.D.	N.D.	N.D.	0.00179654	N.D.	N.D.	N.D.	N.D.	N.D.	N.D.	N.D.	N.D.	N.D.	N.D.	N.D.	N.D.	0.00618778	N.D.	N.D.	N.D.	N.D.	N.D.	N.D.	N.D.	0.00129654	N.D.	N.D.	N.D.	0.00200502
N-Methylglutamic acid	N-Methylglutamic acid	439377		162.076	N.D.	N.D.	N.D.	N.D.	N.D.	N.D.	N.D.	N.D.	N.D.	N.D.	N.D.	N.D.	N.D.	N.D.	N.D.	N.D.	N.D.	N.D.	N.D.	N.D.	N.D.	N.D.	N.D.	N.D.	N.D.	N.D.	N.D.	N.D.	N.D.	N.D.	N.D.	0.000121483	N.D.	N.D.	N.D.	N.D.	N.D.	N.D.	N.D.	N.D.
N-Methylnicotinamide	N-Methylnicotinamide	64950	HMDB0003152	137.071	7.20075e-05	2.46909e-05	3.19134e-05	3.9869e-05	4.12794e-05	7.58956e-05	8.55446e-05	4.26972e-05	N.D.	2.30076e-05	3.15462e-05	2.42451e-05	1.81107e-05	N.D.	2.4018e-05	N.D.	N.D.	1.89422e-05	2.07426e-05	N.D.	8.05232e-05	9.62494e-05	0.000102312	4.57164e-05	0.000445439	0.000733956	0.000329296	0.0005234	0.000102504	7.44576e-05	4.69353e-05	7.59204e-05	4.97928e-05	6.00415e-05	5.69847e-05	3.43439e-05	2.85588e-05	2.4033e-05	4.05986e-05	4.18173e-05
N-Methylproline	N-Methylproline	557		130.086	N.D.	N.D.	N.D.	N.D.	0.000489407	0.000420831	0.000394325	0.000378603	0.0017972	0.00152788	0.00154424	0.00145732	N.D.	0.000191477	N.D.	N.D.	N.D.	N.D.	N.D.	N.D.	N.D.	N.D.	N.D.	N.D.	0.000942667	0.000970706	0.000737597	0.000714009	0.00159584	0.00179165	0.00164218	0.00180902	0.000290645	0.000278164	0.000492665	0.000449395	N.D.	N.D.	N.D.	N.D.
N-Methyltyramine N-Methylphenylethanolamine	N-Methyltyramine N-Methylphenylethanolamine	9727 913	HMDB0003633 HMDB0001387	152.107	0.00014599	2.95125e-05	2.72187e-05	2.71898e-05	N.D.	4.71606e-05	3.24368e-05	2.84214e-05	N.D.	N.D.	N.D.	N.D.	4.36062e-05	2.33001e-05	N.D.	2.32934e-05	5.40298e-05	5.79409e-05	4.63119e-05	6.05305e-05	3.04919e-05	2.19986e-05	1.3703e-05	2.10157e-05	4.76997e-05	N.D.	4.14179e-05	2.42318e-05	N.D.	N.D.	N.D.	N.D.	1.26397e-05	2.20494e-05	2.40403e-05	1.58243e-05	3.48568e-05	2.85754e-05	3.92435e-05	3.92522e-05
N-Succinyl-5-aminoimidazole-4-carboxamide ribose 5'-phosphate_divalent	SAICAR	160666		226.029	N.D.	2.17333e-05	4.29304e-05	1.90483e-05	0.000155616	0.00034541	3.65723e-05	0.000170575	0.000103944	9.03217e-05	0.000107895	9.78794e-05	2.82843e-05	2.42887e-05	2.07851e-05	9.29157e-06	1.59503e-05	1.46475e-05	1.76856e-05	9.03417e-06	7.16568e-06	6.02319e-06	1.30891e-05	1.50424e-05	3.97068e-05	2.67221e-05	3.7659e-05	4.63297e-05	1.73479e-05	3.23418e-05	3.01475e-05	0.000100158	8.24709e-06	7.71414e-06	N.D.	6.24479e-06	2.54645e-05	3.44754e-05	4.18102e-05	2.68338e-05
N1,N12-Diacetylspermine	N1,N12-Diacetylspermine	132680	HMDB0002172	287.244	0.000620838	0.000388332	0.000251725	0.000147069	0.000118275	0.000146304	0.000117055	7.07588e-05	0.00139269	0.0015075	0.00197183	0.00195886	0.00163561	0.00106666	0.00089273	0.00133393	0.00177935	0.00156601	0.00198713	0.00239019	0.00289858	0.0045495	0.00379817	0.00307844	0.00208194	0.00277964	0.00109877	0.00127265	0.00238447	0.00275016	0.00219959	0.00168651	0.00131615	0.00127036	0.00195959	0.00139134	0.00246887	0.000682926	0.00125211	0.000999951
N1,N8-Diacetylspermidine	N1,N8-Diacetylspermidine	389613	HMDB0041947	230.186	0.000374954	7.69619e-05	0.000166544	0.000136085	0.000256063	0.000340717	0.000533844	0.00028289	0.000273013	0.000274388	0.000274313	0.000208702	0.000893747	0.000565977	0.000577372	0.00063715	0.00016114	0.000159544	0.000170845	0.000166459	0.000814717	0.000921004	0.000801697	0.000637998	0.000865521	0.000431439	0.000587498	0.000436927	0.000115934	0.000136924	9.28766e-05	0.000215826	0.00219855	0.00182299	0.00266466	0.00275264	0.000339036	0.000332021	0.000253009	0.000216168
N1-Acetylspermine	N1-Acetylspermine	916	HMDB0001186	245.234	0.000200618	7.65135e-05	8.04338e-05	4.75024e-05	2.34006e-05	9.97481e-05	9.62369e-05	3.57851e-05	N.D.	0.000152481	0.000204598	0.000130047	0.000185136	0.000203712	8.94477e-05	0.000203628	0.00017931	0.000262273	0.000334279	0.00021797	0.000396933	0.000523653	0.000499014	0.000492945	0.000272013	0.000229802	0.00018702	0.000226714	0.000112263	0.000185651	0.000711579	0.000261017	0.000517242	0.000512002	0.00106325	0.000576433	0.000198893	4.63744e-05	0.000166221	0.000155022
N1-Methyl-4-pyridone-5-carboxamide	N1-Methyl-4-pyridone-5-carboxamide	440810	HMDB0004194	153.066	N.D.	0.000177089	0.000224285	0.000206996	0.000373242	0.000356687	0.000324079	0.000341968	0.00118592	0.000677203	0.000684384	0.000701978	0.000334739	0.000313594	0.000274893	0.000282415	0.000209246	0.000192639	0.000194674	0.000154616	N.D.	N.D.	N.D.	N.D.	0.000439963	0.000387642	0.000388797	0.000318337	0.000608967	0.000554823	0.000634432	0.000677997	0.000278282	0.000298795	0.000295425	0.000349923	N.D.	0.000180558	0.000181088	0.000175157
N1-Methylguanosine	N1-Methylguanosine	96373	HMDB0001563	298.115	0.00119564	0.000523755	0.000550819	0.000708903	0.000435616	0.000524291	0.000666971	0.000526512	0.000763301	0.000742281	0.000687209	0.000638795	0.000324444	0.000352847	0.000314988	0.000299944	0.000414705	0.000397867	0.000454038	0.000446729	0.00293332	0.00230645	0.00207836	0.00333869	0.00349358	0.0027071	0.00158871	0.00177852	0.00377084	0.0025942	0.00236408	0.00319735	0.000838625	0.000862416	0.00107279	0.00111664	0.000839169	0.00063304	0.000951047	0.001241
N2-Acetylaminoadipic acid	N2-Acetylaminoadipic acid	443992		202.072	N.D.	N.D.	N.D.	N.D.	N.D.	N.D.	1.14181e-05	N.D.	N.D.	N.D.	N.D.	N.D.	2.49721e-05	1.0412e-05	1.74673e-05	9.52624e-06	N.D.	N.D.	N.D.	N.D.	N.D.	N.D.	N.D.	N.D.	N.D.	N.D.	5.73382e-06	N.D.	N.D.	N.D.	N.D.	N.D.	2.54801e-05	2.67509e-05	4.72566e-05	4.11282e-05	N.D.	N.D.	N.D.	N.D.
N2-Phenylacetylglutamine	N2-Phenylacetylglutamine	92258	HMDB0006344	263.103	6.52832e-05	2.76803e-05	3.43318e-05	4.27936e-05	0.000228821	0.000208681	0.000255275	0.000173783	0.000205166	0.00014608	0.000142437	0.000164169	0.000386166	0.000462401	0.000490097	0.000489663	3.92281e-05	6.13852e-05	7.01534e-05	6.02892e-05	2.50175e-05	2.13131e-05	2.37827e-05	2.23483e-05	0.000166335	0.000132094	0.000150934	0.000132689	8.34864e-05	7.63854e-05	0.000136915	0.000108063	0.000296658	0.00027484	0.000385857	0.000342219	5.18821e-05	6.19672e-05	5.52385e-05	6.62504e-05
N2-Succinylornithine	N2-Succinylornithine	127370	HMDB0001199	233.113	N.D.	1.1904e-05	N.D.	N.D.	2.8178e-05	N.D.	6.99986e-05	1.94273e-05	N.D.	7.11674e-06	6.75455e-06	N.D.	2.97543e-05	1.78933e-05	2.30774e-05	2.05505e-05	N.D.	N.D.	1.19142e-05	N.D.	7.82982e-06	N.D.	N.D.	N.D.	4.89752e-05	9.78761e-06	3.33221e-05	5.14062e-05	N.D.	9.64438e-06	N.D.	N.D.	3.51197e-05	3.30714e-05	8.86142e-05	7.05504e-05	N.D.	7.66952e-06	9.99245e-06	5.94802e-06
N5-Ethylglutamine	N5-Ethylglutamine	439378		175.108	0.000200361	8.12011e-05	9.51876e-05	7.03261e-05	5.24472e-05	8.85295e-05	9.25273e-05	6.28057e-05	N.D.	2.25851e-05	2.25363e-05	1.82217e-05	8.03724e-05	3.66152e-05	3.86841e-05	4.79733e-05	5.07965e-05	5.76882e-05	4.51491e-05	4.54506e-05	7.08432e-05	5.93072e-05	8.26182e-05	7.10333e-05	3.99807e-05	7.28701e-05	4.81191e-05	5.86016e-05	N.D.	2.15059e-05	2.18824e-05	3.13696e-05	6.51192e-05	6.29322e-05	8.73834e-05	0.000102434	6.28027e-05	7.93372e-05	7.5499e-05	4.37279e-05
N6,N6,N6-Trimethyllysine	Trimethyllysine	440120	HMDB0001325	189.16	0.00743852	0.00305294	0.00412763	0.00384128	0.0038161	0.00392705	0.00394867	0.00388294	0.00690645	0.00583833	0.00606526	0.00598672	0.00310658	0.00259361	0.00252448	0.00252558	0.00317414	0.00323494	0.00320761	0.00324236	0.00331567	0.00425765	0.00458447	0.00349155	0.00436644	0.00417132	0.0038018	0.00395496	0.00334559	0.00412616	0.00423718	0.00397711	0.00356586	0.00335976	0.00428341	0.00415416	0.00364754	0.00272988	0.00306286	0.00248761
N6-Acetyllysine	N6-Acetyllysine	92832	HMDB0000206	189.123	0.00443915	0.00212186	0.00293728	0.00238957	0.00282147	0.00295495	0.00369172	0.00357003	0.00447495	0.00386994	0.00397219	0.00337359	0.00211683	0.00144847	0.00145572	0.00123733	0.00122345	0.000939478	0.00101511	0.00102351	0.00193971	0.00213584	0.00221345	0.00178212	0.00261756	0.00250948	0.00232583	0.00274984	0.0015414	0.00227404	0.00218106	0.00193417	0.00233946	0.00201963	0.0027597	0.00287142	0.00109601	0.00109667	0.00120417	0.000595678
N6-Methyl-2'-deoxyadenosine	N6-Methyl-2'-deoxyadenosine	168948		266.124	0.000224239	4.56372e-05	5.98149e-05	2.63922e-05	6.24983e-05	3.79941e-05	4.41966e-05	3.01131e-05	0.000169545	6.09506e-05	3.80936e-05	2.86352e-05	9.5056e-05	2.08248e-05	3.14283e-05	4.2978e-05	5.37169e-05	2.97458e-05	4.45644e-05	5.60961e-05	4.36847e-05	2.39313e-05	4.13213e-05	N.D.	5.93992e-05	6.14719e-05	2.31786e-05	3.87257e-05	4.86475e-05	5.22927e-05	4.28356e-05	3.00123e-05	4.19014e-05	2.28549e-05	3.26982e-05	6.79405e-06	3.64959e-05	4.50265e-05	4.05888e-05	N.D.
N6-Methyllysine	N6-Methyllysine	164795	HMDB0002038	161.128	0.00667	0.00223714	0.00347645	0.00312126	0.00370794	0.00374881	0.00338959	0.00349324	0.00877835	0.00580319	0.00566486	0.00624557	0.0030831	0.00235525	0.00214474	0.00212455	0.00272204	0.0027162	0.00288293	0.00264893	0.00174431	0.00216473	0.00251526	0.00166233	0.00326211	0.00226624	0.00216388	0.00205381	0.00334098	0.00349431	0.00289772	0.00390344	0.00257095	0.00224178	0.00299613	0.00278145	0.00241796	0.00261535	0.00260448	0.00228151
N8-Acetylspermidine	N8-Acetylspermidine	123689	HMDB0002189	188.176	0.0292398	0.00883443	0.00858073	0.00631461	0.0109731	0.00756594	0.00825252	0.00723284	0.0101783	0.00715602	0.00637847	0.00584686	0.0134169	0.00997355	0.00784915	0.00881973	0.00683502	0.00641829	0.00550842	0.00468799	0.0317296	0.0362297	0.0244172	0.0184759	0.0340235	0.0203162	0.031366	0.0157171	0.015656	0.0114274	0.0125143	0.0122099	0.0238845	0.0186305	0.0187743	0.0159589	0.00993658	0.00712145	0.00834634	0.00714217
NAD+	NAD+	5893	HMDB0000902	662.101	0.00270537	0.00120839	0.000985958	0.000618437	0.00448404	0.00463281	0.00294977	0.0030147	0.00247779	0.001476	0.000912213	0.00141969	0.00229856	0.00123443	0.00170374	0.00255022	0.00838848	0.00680178	0.0062866	0.00512694	0.00164248	0.000755608	0.000837144	0.000814519	0.0107616	0.00940663	0.0134652	0.00207992	0.0034759	0.00371839	0.00149687	0.00422417	0.00522564	0.00550975	0.00804436	0.00931164	0.00876906	0.0106022	0.00576823	0.00224593
NADH	NADH	439153	HMDB0001487	664.116	6.1792e-05	5.645e-05	7.2374e-05	5.06241e-05	7.27686e-05	0.000254873	0.000189538	0.000138113	6.90621e-05	0.000128666	0.000133015	0.000147203	6.92063e-05	6.17206e-05	7.7171e-05	0.000106163	0.00015066	0.000185972	0.0004478	0.000180204	0.000116314	5.00452e-05	7.98176e-05	0.000112796	0.000153147	0.000200357	0.000348334	0.000203159	9.75179e-05	0.000188128	0.000131369	0.000378099	0.00018891	0.000204383	0.000276796	0.000560755	0.000220899	0.00024555	0.000279265	0.000381757
NADP+	NADP+	5886	HMDB0000217	742.066	0.00211945	0.000840953	0.000568978	0.00037566	0.00236943	0.00196677	0.000888769	0.000785575	0.00134769	0.000673116	0.000207189	0.000379342	0.00199452	0.00130293	0.000721496	0.00059888	0.0030119	0.0018872	0.000529783	0.000548384	0.000479757	0.000368935	0.000184006	9.69904e-05	0.00187399	0.00125201	0.00106086	0.00014469	0.000591535	0.00137187	0.000309434	0.000417615	0.00174151	0.00170983	0.00174473	0.000863821	0.000886586	0.000460254	0.000417275	0.000121541
NADPH_divalent	NADPH	5884		371.538	N.D.	N.D.	N.D.	N.D.	2.48434e-05	1.72191e-06	N.D.	N.D.	N.D.	4.58219e-06	N.D.	6.32287e-06	N.D.	6.18871e-06	N.D.	5.50141e-06	N.D.	N.D.	N.D.	4.28949e-06	N.D.	N.D.	8.00878e-06	N.D.	0.000416111	0.000580048	0.000916808	0.000257943	0.00057219	0.000242277	0.000125768	1.18459e-05	5.34023e-05	1.16652e-05	N.D.	8.83007e-06	1.86061e-05	8.50107e-05	2.08174e-05	N.D.
Neopterin	Neopterin	135398721	HMDB0000845	254.088	N.D.	N.D.	N.D.	N.D.	N.D.	N.D.	N.D.	N.D.	N.D.	N.D.	6.3403e-06	N.D.	N.D.	4.43137e-06	N.D.	N.D.	N.D.	N.D.	N.D.	N.D.	8.69635e-06	N.D.	N.D.	N.D.	N.D.	N.D.	2.30969e-05	2.96912e-05	5.63667e-05	3.20679e-05	4.0776e-05	2.98649e-05	1.80696e-05	8.29129e-06	1.57007e-05	3.01703e-05	N.D.	N.D.	4.74275e-06	9.32519e-06
Nicotinamide	Nicotinamide	936	HMDB0001406	123.055	0.337181	0.152717	0.2538	0.210966	0.268203	0.318947	0.243009	0.243399	0.43057	0.299516	0.296736	0.328628	0.301829	0.177798	0.213817	0.188006	0.297579	0.291061	0.288318	0.328514	0.192965	0.185252	0.208348	0.156899	0.363081	0.345799	0.371729	0.33796	0.236483	0.25265	0.18402	0.264236	0.158269	0.139261	0.163017	0.155189	0.255025	0.258371	0.252001	0.236813
Nicotine	Nicotine	89594		163.123	0.000130988	1.55329e-05	1.63274e-05	5.59099e-05	3.60471e-05	1.4158e-05	1.30396e-05	1.14053e-05	4.09867e-05	1.60923e-05	2.74209e-05	1.23431e-05	4.40363e-05	1.81922e-05	1.09374e-05	N.D.	2.29054e-05	2.38644e-05	1.35447e-05	1.23545e-05	1.27401e-05	0.000118235	N.D.	0.000149694	N.D.	1.70354e-05	2.30221e-05	1.32291e-05	N.D.	N.D.	6.03584e-06	5.04273e-06	1.18737e-05	5.73162e-06	5.91403e-06	N.D.	6.76314e-06	0.000122261	1.43209e-05	N.D.
Nicotinic acid	Nicotinic acid	938	HMDB0001488	124.039	N.D.	N.D.	N.D.	N.D.	N.D.	N.D.	0.00227352	N.D.	N.D.	N.D.	N.D.	N.D.	0.00124278	0.00363307	0.00248971	0.00436738	N.D.	N.D.	N.D.	N.D.	0.00475001	0.00464786	0.00508764	0.00386541	N.D.	N.D.	N.D.	N.D.	N.D.	N.D.	N.D.	N.D.	0.00164509	0.00581976	0.00498543	0.00456442	N.D.	N.D.	N.D.	N.D.
NMN	NicRN	14180	HMDB0000229	335.064	0.000133479	9.24023e-05	5.85275e-05	1.09185e-05	0.000372735	0.000419236	0.000440096	0.000268025	N.D.	4.22911e-05	1.28877e-05	N.D.	0.000172776	6.37278e-05	8.48591e-05	0.000138991	0.000620561	0.000581236	0.000279541	0.000255124	0.000139743	6.34252e-05	N.D.	4.70369e-05	0.000727876	0.000361387	0.000405961	5.2329e-05	0.000151685	0.000182658	N.D.	0.000141761	0.000341672	0.000408353	0.000416665	0.000410419	0.000244559	0.000216715	0.000170437	2.42361e-05
Noradrenaline 6-Hydroxydopamine	6-Hydroxydopamine	439260 4624	HMDB0000216 HMDB0001537	170.081	N.D.	N.D.	N.D.	N.D.	5.70074e-05	0.000106503	4.55471e-05	5.23343e-05	N.D.	2.11293e-05	7.66936e-06	1.68158e-05	3.94047e-05	1.46628e-05	N.D.	N.D.	3.36175e-05	3.6104e-05	4.10694e-05	4.02709e-05	N.D.	N.D.	N.D.	N.D.	N.D.	N.D.	N.D.	N.D.	N.D.	N.D.	N.D.	N.D.	N.D.	N.D.	N.D.	N.D.	N.D.	N.D.	N.D.	N.D.
N’-Formylkynurenine	N-Formylkynurenine	910	HMDB0001200	237.087	0.000197555	7.03465e-05	8.90234e-05	9.54657e-05	0.000142824	9.6112e-05	8.9844e-05	0.000172251	N.D.	0.000238369	0.00012187	0.000273905	N.D.	4.58397e-05	6.74586e-05	4.03622e-05	7.28986e-05	0.000142578	0.000176426	0.000147148	0.000324169	0.000328886	0.000269841	0.000291409	0.0031224	0.0065964	0.000583334	0.00320051	0.00568002	0.00453791	0.00195089	0.00376649	0.000494751	0.000526632	0.000819773	0.0010929	0.000642521	0.000588061	0.000960508	0.000925063
Nω-Methylarginine	Nw-Methylarginine	132862		189.135	0.006628	0.00267435	0.00504765	0.00509786	0.00387882	0.0037033	0.00303536	0.00367288	0.00581116	0.00345288	0.00317509	0.00259266	0.00254492	0.00221978	0.00160983	0.00144518	0.00142053	0.00149368	0.00121446	0.00129229	0.00222872	0.00282967	0.0022033	0.000925647	0.00228162	0.00178486	0.0012978	0.00140277	0.00152152	0.00182458	0.00121763	0.00132614	0.00132473	0.00114229	0.00138961	0.000940936	0.000769337	0.00072587	0.000909074	0.000850719
O-Acetylcarnitine	ALCAR	439756	HMDB0000201	204.123	0.117795	0.0418842	0.0335153	0.0336757	0.0680318	0.0670142	0.0696323	0.0434339	0.471033	0.237493	0.227347	0.237391	0.104426	0.0668848	0.0951193	0.11038	0.262733	0.215453	0.236997	0.279253	0.167668	0.148172	0.202296	0.143904	0.38029	0.359083	0.290337	0.2841	0.268052	0.217416	0.18981	0.218086	0.128748	0.162164	0.0844107	0.118763	0.271318	0.224612	0.202736	0.198865
o-Hydroxybenzoic acid	o-Hydroxybenzoic acid	338	HMDB0001895	137.024	N.D.	N.D.	N.D.	N.D.	N.D.	N.D.	N.D.	N.D.	N.D.	N.D.	N.D.	N.D.	N.D.	6.17941e-05	N.D.	N.D.	N.D.	N.D.	N.D.	N.D.	N.D.	7.56804e-05	N.D.	N.D.	N.D.	N.D.	N.D.	N.D.	N.D.	N.D.	N.D.	N.D.	N.D.	N.D.	N.D.	N.D.	N.D.	0.000121309	N.D.	N.D.
O-Phosphoserine	3PSer	68841	HMDB0000272	184.001	7.84633e-05	2.71116e-05	3.10174e-05	1.65435e-05	3.10749e-05	3.63942e-05	6.81296e-05	1.51924e-05	0.000153102	8.35234e-05	5.65321e-05	4.07398e-05	3.72179e-05	7.07947e-05	6.9237e-05	6.51198e-05	3.47737e-05	2.94294e-05	2.73058e-05	3.1241e-05	1.49125e-05	1.51769e-05	N.D.	N.D.	2.56757e-05	7.809e-06	9.89425e-06	N.D.	3.8624e-05	9.5417e-06	0.000136811	1.34965e-05	1.25591e-05	7.90867e-05	1.93145e-05	9.18993e-06	6.80003e-06	1.68167e-05	1.84335e-05	N.D.
O-Succinylhomoserine	O-Succinylhomoserine	439406		218.067	0.000646557	0.000302601	0.000491932	0.000414923	0.000474364	0.000350419	0.000265546	0.000379377	0.000326748	0.000410887	0.000368377	0.000289077	0.000215609	0.00017933	0.00020007	0.000176878	0.000300541	0.000347252	0.000326542	0.00032662	0.000507079	0.000491302	0.000496006	0.000368179	0.00119436	0.00139462	0.000732758	0.000944884	0.000542914	0.000788101	0.000427533	0.000647087	0.000565572	0.000628613	0.000826012	0.000720184	0.000544402	0.000466921	0.000512833	0.000540749
o-Toluic acid p-Toluic acid m-Toluic acid	o-Toluic acid p-Toluic acid m-Toluic acid	8373 7470 7418		135.045	0.0299591	0.00336972	0.00202304	0.000666808	0.00672323	0.00340244	0.00221286	0.00105495	0.0248893	0.00516586	0.000751556	0.00087542	0.0118517	0.00328052	0.00145464	0.000776414	0.0113094	0.00521692	0.00153516	0.000786401	0.00205643	0.00592272	0.00160526	0.00049256	0.0154432	0.00759637	0.00280829	0.00108043	0.00403457	0.00155141	0.000906059	0.000765976	0.00536764	0.00540845	0.00238692	0.00105085	0.003358	0.00154856	0.00183388	0.000512078
Octanoic acid	Octanoic acid	379	HMDB0000482	143.107	0.00470734	0.0006365	0.000636626	0.000555495	0.00110477	0.000880687	0.00136352	0.000793121	0.00308434	0.000761114	0.000651126	0.000582288	0.00149499	0.000514269	0.000610627	0.000322467	0.000817351	0.000631003	0.000253669	0.000246076	0.00143642	0.00122052	0.00102724	0.0008419	0.00291619	0.0012674	0.0013735	0.00105543	0.00114748	0.00115059	0.0014901	0.000994328	0.00116352	0.00107624	0.0010544	0.000935516	0.000653205	0.000705596	0.000974541	0.000619746
Octanoyl CoA_divalent	Octanoyl CoA	445344		445.602	N.D.	N.D.	N.D.	N.D.	N.D.	6.47465e-06	N.D.	N.D.	N.D.	N.D.	N.D.	N.D.	N.D.	N.D.	N.D.	N.D.	N.D.	N.D.	N.D.	N.D.	N.D.	N.D.	N.D.	N.D.	N.D.	N.D.	3.80969e-06	N.D.	N.D.	N.D.	N.D.	N.D.	4.89366e-06	8.75467e-06	N.D.	N.D.	2.37896e-05	1.09127e-05	N.D.	N.D.
Octanoylcarnitine	Octanoylcarnitine	11953814	HMDB0000791	288.217	3.28972e-05	1.14602e-05	N.D.	7.36761e-06	4.56224e-05	5.31482e-05	3.44419e-05	N.D.	N.D.	3.3517e-05	4.37147e-05	5.73254e-05	7.61854e-05	2.59956e-05	4.05316e-05	5.34228e-05	2.30514e-05	4.38922e-05	5.13076e-05	2.78184e-05	0.000107838	8.60491e-05	0.000104654	9.66081e-05	0.000625637	0.000782553	0.000309736	0.000902591	0.00011743	0.00014373	0.000392589	0.000162328	0.000170715	0.000186811	0.000114072	0.000334915	0.000570135	0.000583377	0.000365495	0.000479376
Octopine	Octopine	440237		247.14	N.D.	N.D.	N.D.	N.D.	N.D.	N.D.	N.D.	N.D.	N.D.	7.45471e-06	N.D.	N.D.	1.02527e-05	N.D.	N.D.	N.D.	N.D.	N.D.	N.D.	N.D.	N.D.	2.7064e-05	N.D.	2.31789e-05	N.D.	N.D.	N.D.	N.D.	N.D.	N.D.	N.D.	N.D.	N.D.	N.D.	N.D.	N.D.	N.D.	2.15596e-05	4.74275e-06	N.D.
Ophthalmic acid	Ophthalmic acid	7018721	HMDB0005765	290.135	0.00996181	0.0068855	0.00866574	0.00610712	0.0193414	0.018835	0.0166396	0.016456	0.0159248	0.0122692	0.0116728	0.00981526	0.0125547	0.0117577	0.0101161	0.012231	0.0265449	0.0204151	0.0228102	0.0218591	0.00369508	0.00337695	0.00480385	0.00482726	0.0187826	0.0125745	0.0218112	0.0134357	0.00382392	0.00532089	0.00355901	0.00793539	0.00655405	0.00834394	0.0090599	0.010589	0.0180641	0.0216772	0.0139097	0.0129677
Ornithine	Ornithine	389	HMDB0000214,HMDB0003374	133.097	0.041082	0.0134012	0.0183164	0.0158907	0.034666	0.0360585	0.0583679	0.0379971	0.0428789	0.0311854	0.028292	0.0282104	0.0274289	0.0180262	0.0182213	0.0192301	0.0209124	0.0142215	0.0159376	0.0132346	0.0203546	0.0208979	0.0219983	0.0229446	0.148557	0.0744529	0.0733892	0.0666555	0.0512747	0.0487521	0.045062	0.0391352	0.0388489	0.0418828	0.0661358	0.0514719	0.00955036	0.0175536	0.0134588	0.0120231
Orotic acid	Orotic acid	967	HMDB0000226	155.01	0.00014122	4.73585e-05	9.18036e-05	8.48658e-05	0.00010025	0.000229886	4.78848e-05	8.97489e-05	9.91527e-05	5.85156e-05	7.67235e-05	6.06239e-05	4.27003e-05	0.000111546	9.07712e-05	7.27271e-05	3.50769e-05	4.33244e-05	4.16696e-05	6.30905e-05	8.1971e-05	0.00013748	0.000100105	0.000391478	0.000199731	0.000344474	0.000327291	0.000226883	0.000334232	0.000786788	0.000428737	0.000713978	0.000278093	0.000219705	0.000447092	0.000338423	0.000162418	0.000256585	0.00040672	0.000373387
Orotidine	Orotidine	92751	HMDB0000788	287.052	0.000402523	0.000198533	0.000305409	0.000283133	0.00035541	0.000277328	0.000207776	0.000246536	2.84895e-05	7.79171e-05	6.48417e-05	6.83953e-05	5.45544e-05	0.00011778	6.18317e-05	7.23865e-05	4.84745e-05	7.56662e-05	6.36316e-05	7.25448e-05	0.000107966	0.000103689	0.000124452	0.000165708	0.000233184	0.000289534	0.000351834	0.000356063	0.000199334	0.00023639	0.000233162	0.000272225	0.000245529	0.00017276	0.000294562	0.000260116	7.81385e-05	9.6701e-05	0.000142213	0.000139787
Oxamic acid	Oxamic acid	974		88.0039	N.D.	N.D.	N.D.	N.D.	N.D.	N.D.	N.D.	N.D.	N.D.	5.39663e-06	N.D.	N.D.	N.D.	3.82694e-06	N.D.	N.D.	N.D.	3.63945e-06	N.D.	N.D.	N.D.	1.9273e-05	N.D.	N.D.	N.D.	1.35215e-05	N.D.	N.D.	N.D.	N.D.	N.D.	2.93349e-06	N.D.	3.29501e-06	2.67171e-06	N.D.	N.D.	N.D.	5.82544e-06	N.D.
p-Chlorobenzoic acid o-Chlorobenzoic acid	p-Chlorobenzoic acid o-Chlorobenzoic acid	6318 8374		154.99	1.58856e-05	2.34485e-06	1.93442e-06	N.D.	N.D.	N.D.	N.D.	N.D.	N.D.	3.45209e-06	N.D.	N.D.	1.35353e-05	N.D.	N.D.	N.D.	1.33149e-05	2.35677e-06	N.D.	N.D.	N.D.	4.66311e-06	N.D.	N.D.	9.10965e-06	N.D.	N.D.	N.D.	N.D.	2.02273e-06	N.D.	N.D.	N.D.	N.D.	N.D.	N.D.	N.D.	N.D.	N.D.	N.D.
p-Hydroxybenzoic acid	p-Hydroxybenzoic acid	135	HMDB0000500	137.024	N.D.	N.D.	N.D.	N.D.	N.D.	N.D.	N.D.	N.D.	N.D.	N.D.	N.D.	N.D.	N.D.	N.D.	N.D.	N.D.	N.D.	N.D.	N.D.	N.D.	N.D.	9.99515e-05	N.D.	N.D.	N.D.	N.D.	N.D.	N.D.	N.D.	N.D.	N.D.	N.D.	N.D.	N.D.	N.D.	N.D.	N.D.	N.D.	N.D.	N.D.
p-Hydroxymandelic acid Homogentisic acid	p-Hydroxymandelic acid Homogentisic acid	328 780	HMDB0000822 HMDB0000130	167.035	N.D.	N.D.	6.63707e-06	7.03655e-06	7.48936e-06	1.07167e-05	7.68526e-06	1.37753e-05	N.D.	N.D.	N.D.	N.D.	8.65975e-06	1.23703e-05	1.85482e-05	N.D.	N.D.	5.37439e-06	6.09304e-06	N.D.	1.86668e-05	1.99729e-05	1.86059e-05	2.92531e-05	N.D.	N.D.	6.14333e-06	N.D.	2.05802e-05	4.15706e-05	1.41829e-05	2.06197e-05	2.29774e-05	2.44441e-05	3.80898e-05	2.49254e-05	1.04418e-05	1.85608e-05	1.63255e-05	1.47915e-05
p-Hydroxyphenylacetic acid 3-Hydroxyphenylacetic acid p-Anisic acid-1	4-HPAA 3-Hydroxyphenylacetic acid p-Anisic acid	127 12122 7478	HMDB0000020 HMDB0000440 HMDB0001101	151.04	N.D.	N.D.	N.D.	N.D.	N.D.	0.000182539	0.000551462	0.000236589	N.D.	N.D.	N.D.	N.D.	0.000215394	N.D.	0.000162232	0.000112354	N.D.	N.D.	N.D.	N.D.	N.D.	N.D.	N.D.	N.D.	0.00090423	0.000461592	0.000486237	0.000468276	N.D.	N.D.	N.D.	N.D.	N.D.	N.D.	0.000206135	0.000175391	N.D.	N.D.	N.D.	N.D.
p-Sulfobenzoic acid	p-Sulfobenzoic acid	69469		200.986	0.000136575	N.D.	N.D.	N.D.	N.D.	N.D.	2.81206e-05	N.D.	0.000156969	N.D.	N.D.	3.88211e-05	0.00096449	N.D.	N.D.	N.D.	N.D.	4.75253e-05	N.D.	N.D.	N.D.	N.D.	N.D.	N.D.	N.D.	N.D.	7.40467e-05	N.D.	N.D.	N.D.	2.53443e-05	N.D.	N.D.	3.59464e-05	4.95001e-05	N.D.	5.64045e-05	9.95572e-05	N.D.	N.D.
Pantothenic acid	Pantothenic acid	6613	HMDB0000210	218.103	0.00415033	0.00193708	0.00258442	0.00225312	0.000872374	0.00124613	0.0011335	0.00101104	0.00144965	0.00105579	0.0012111	0.00122672	0.000948995	0.00078872	0.000913385	0.000711269	0.00162182	0.00188288	0.00117513	0.00133414	0.00821885	0.00935294	0.00639764	0.00706642	0.0051479	0.00480263	0.00397361	0.00276358	0.00306248	0.00330696	0.00238862	0.00419519	0.00157945	0.00177517	0.00243613	0.00220703	0.00105686	0.000806888	0.00110758	0.00114087
Paraxanthine	Paraxanthine	4687	HMDB0001860	181.072	0.00121986	0.000435818	0.000831043	0.000613313	0.000249321	0.000264075	0.000348005	0.000258701	N.D.	0.000544864	0.000547602	0.000512979	0.00158274	0.00128792	0.00131279	0.00133923	0.000291083	0.000305281	0.00032773	0.000276581	0.000690322	0.000828349	0.000786191	0.000678684	0.000265746	0.00024247	0.000273707	0.000225172	0.000345365	0.00038822	0.000413796	0.000362558	0.00137075	0.00142011	0.00156846	0.00157632	0.000331291	0.000388464	0.000367571	0.00031455
Pelargonic acid	Pelargonic acid	8158	HMDB0000847	157.123	0.0206227	0.00309032	0.00242755	0.00142226	0.00493126	0.00276351	0.00254154	0.00173954	0.0168052	0.00449779	0.0044759	0.00317273	0.00568016	0.00208123	0.00176525	0.00132601	0.00452843	0.00249278	0.00137716	0.00140641	0.00282694	0.00335242	0.00200257	0.00103584	0.012066	0.00540315	0.0043231	0.00209546	0.00316981	0.00259754	0.0030505	0.00205147	0.00300243	0.00336873	0.00263294	0.00203542	0.00240305	0.00235377	0.00232691	0.00138889
Penicillamine	Penicillamine	5852		150.058	0.000155038	2.69561e-05	7.13435e-05	3.71039e-05	3.08148e-05	3.72429e-05	2.53243e-05	1.87996e-05	N.D.	7.06281e-05	4.27539e-05	4.34248e-05	5.59524e-05	1.88267e-05	2.03095e-05	3.62933e-05	N.D.	1.96085e-05	2.59201e-05	3.13569e-05	N.D.	3.48896e-05	4.94093e-05	4.38425e-05	7.5519e-05	0.000112051	7.51958e-05	6.80297e-05	7.81226e-05	8.84438e-05	8.20458e-05	3.80187e-05	3.72826e-05	4.30562e-05	4.42741e-05	2.03982e-05	1.33195e-05	2.08991e-05	1.3463e-05	N.D.
Perillic acid	Perillic acid	1256	HMDB0004586	165.092	0.00010166	4.743e-05	4.38809e-05	4.67391e-05	0.000242755	0.000264698	0.000365554	0.000248311	0.000174607	0.000105079	9.74299e-05	0.000118294	3.83178e-05	4.03765e-05	3.63059e-05	3.38932e-05	N.D.	5.07437e-05	4.89135e-05	4.58537e-05	5.22128e-05	5.51821e-05	7.6052e-05	4.62561e-05	0.000213125	0.000123148	0.00013384	0.000129677	5.65864e-05	5.06918e-05	0.00010838	7.16245e-05	2.97448e-05	3.50855e-05	3.21583e-05	3.83585e-05	4.33885e-05	6.03291e-05	4.27364e-05	5.67681e-05
Phe	Phe	994	HMDB0000159	166.086	1.00701	0.431184	0.590556	0.560172	0.474127	0.517027	0.552661	0.51388	0.728794	0.522615	0.550137	0.489003	0.505553	0.358143	0.369588	0.319065	0.399247	0.329898	0.351928	0.403032	0.4338	0.48162	0.476706	0.319285	0.908622	0.577734	0.549132	0.570398	0.405426	0.441171	0.398485	0.358135	0.400715	0.410717	0.612444	0.534366	0.304051	0.276117	0.320804	0.257653
Phenol	Phenol	996	HMDB0000228	93.0344	N.D.	0.000219268	0.000279094	0.00026167	0.000243729	0.000264189	0.000282793	0.000254772	N.D.	0.000232482	0.00022985	0.000165204	0.000227922	0.000138098	0.000244095	0.00016016	0.00019171	0.000177575	0.00019259	0.000235631	0.0002878	0.000288318	0.00021051	0.000177152	0.000476443	0.000211543	0.000154275	0.000149324	0.000263789	0.000166878	0.000167023	0.000221194	0.000171999	0.000201596	0.00025532	0.000204864	0.000180653	0.000112586	0.000153476	0.000120452
Phenylpyruvic acid	Phenylpyruvate	997	HMDB0000205	163.04	0.000504312	N.D.	4.06541e-05	N.D.	N.D.	N.D.	N.D.	N.D.	0.000423622	8.87258e-05	3.65488e-05	N.D.	0.000210059	N.D.	N.D.	N.D.	0.000160853	5.06891e-05	N.D.	N.D.	N.D.	6.56543e-05	N.D.	N.D.	0.000190312	N.D.	6.12207e-05	N.D.	8.9975e-05	5.51338e-05	N.D.	N.D.	8.10953e-05	9.11154e-05	N.D.	N.D.	5.85957e-05	N.D.	N.D.	N.D.
Phosphocreatine	Phosphocreatine	9548602	HMDB0001511	210.028	0.000215565	5.24668e-05	9.29459e-05	9.24807e-05	0.000113733	0.000459801	0.000314777	0.000148393	0.000318409	0.000126796	0.00163975	0.00126846	5.66739e-05	2.47675e-05	7.30705e-05	2.92973e-05	4.11676e-05	2.82754e-05	0.000163727	2.87374e-05	0.000106603	0.000102658	4.44728e-05	0.00010042	0.00248408	0.000141675	0.000471193	5.77567e-05	3.86722e-05	9.83684e-05	6.71066e-05	0.000132963	N.D.	N.D.	0.000270561	2.20913e-05	3.28579e-05	4.57042e-05	3.63355e-05	0.000328495
Phosphoenolpyruvic acid	PEP	1005	HMDB0000263	166.975	0.00066672	0.000434959	7.21759e-05	5.303e-05	0.00133778	0.000637763	0.000610542	8.10923e-05	0.00454685	0.00384463	0.000878121	0.000306106	0.00158635	0.000622289	3.32136e-05	1.13434e-05	0.00131018	0.000438693	2.20545e-05	N.D.	0.000301323	0.00110066	5.86377e-05	0.000199619	0.00187497	0.00141739	0.000423827	0.000102332	0.000724038	9.07438e-05	0.000176872	0.000137444	0.00019502	0.000225519	3.94745e-05	2.93315e-05	0.000114783	5.82504e-05	4.76192e-05	9.19624e-05
Phosphoglycolic acid	2-Phosphoglycolic acid	529	HMDB0000816	154.975	0.000118819	2.71635e-05	0.000125831	1.5526e-05	N.D.	N.D.	N.D.	N.D.	N.D.	N.D.	7.43739e-05	8.22714e-05	5.23883e-05	4.19367e-05	3.24049e-05	5.97887e-05	2.28988e-05	6.90306e-05	6.67458e-05	0.000152804	N.D.	6.10189e-05	N.D.	1.86127e-05	4.697e-05	5.23479e-05	2.64367e-05	7.49392e-06	N.D.	N.D.	N.D.	N.D.	N.D.	4.09485e-05	N.D.	N.D.	N.D.	N.D.	1.03813e-05	1.39573e-05
Phosphonoacetic acid	Phosphonoacetic acid	546	HMDB0004110	138.98	N.D.	N.D.	N.D.	N.D.	N.D.	N.D.	N.D.	N.D.	N.D.	2.99564e-05	N.D.	N.D.	N.D.	N.D.	N.D.	N.D.	N.D.	N.D.	N.D.	N.D.	N.D.	N.D.	N.D.	N.D.	N.D.	N.D.	N.D.	N.D.	N.D.	N.D.	N.D.	N.D.	N.D.	N.D.	N.D.	N.D.	N.D.	N.D.	N.D.	N.D.
Phosphorylcholine	Phosphorylcholine	1014	HMDB0001565	184.073	1.90438	0.74174	1.19089	0.903526	1.05492	1.12852	0.867203	1.02158	1.5003	1.04777	1.05709	1.04376	1.1311	0.856411	0.835851	0.846655	0.883935	0.873047	0.810587	0.970291	0.562503	0.597324	0.696571	0.569147	0.554288	0.780251	1.01494	0.749775	1.06482	1.42589	0.972515	1.15789	0.61525	0.796	0.721313	0.747216	0.838776	0.858793	0.840765	0.618456
Phthalic acid	Phthalic acid	1017	HMDB0002107	165.019	0.000797993	0.000103267	N.D.	7.30516e-05	0.000233266	N.D.	N.D.	N.D.	0.000714281	0.00017021	0.000112568	N.D.	0.00034666	0.000197527	N.D.	N.D.	0.000210947	0.000177343	N.D.	N.D.	N.D.	0.000382117	N.D.	N.D.	0.000444411	0.000224754	0.000159863	N.D.	N.D.	N.D.	N.D.	N.D.	N.D.	0.00014315	N.D.	N.D.	N.D.	N.D.	0.000125064	N.D.
Phytic acid_divalent	Phytic acid	890		328.923	N.D.	9.21933e-05	6.27957e-05	4.77446e-05	0.000284013	5.57352e-05	2.15788e-05	0.000435292	N.D.	N.D.	N.D.	6.71198e-06	N.D.	1.67263e-05	N.D.	N.D.	N.D.	N.D.	N.D.	N.D.	1.26969e-05	5.32828e-05	1.67726e-05	1.20625e-05	N.D.	0.000176599	0.000570099	0.000840081	0.000626075	0.000691263	5.22694e-05	0.000350194	0.000173283	3.97721e-05	6.54017e-05	2.56881e-05	2.45628e-05	3.63857e-05	2.28159e-06	3.21964e-06
Pimelic acid	Pimelic acid	385	HMDB0000857	159.066	N.D.	4.29318e-05	N.D.	N.D.	5.87394e-05	N.D.	N.D.	N.D.	N.D.	0.000102903	0.000169784	7.96239e-05	N.D.	4.6472e-05	N.D.	N.D.	N.D.	5.51512e-05	N.D.	N.D.	N.D.	0.000124308	N.D.	N.D.	0.000130315	N.D.	N.D.	N.D.	N.D.	N.D.	4.79648e-05	3.88834e-05	N.D.	5.12263e-05	N.D.	4.39677e-05	8.29109e-05	0.00025129	7.13119e-05	5.71174e-05
Pipecolic acid	Pipecolic acid	439227	HMDB0000070,HMDB0000716,HMDB0005960	130.086	0.00468526	0.00173993	0.00251392	0.00227109	0.00234031	0.00249654	0.00250275	0.00238071	0.00144688	0.00103313	0.000936909	0.000921914	0.0148256	0.00539677	0.00743134	0.00689955	0.00124891	0.00111284	0.00116301	0.00118391	0.00169227	0.00189643	0.00215849	0.00199781	0.00472547	0.00370063	0.00394262	0.00340505	0.00111816	0.0010578	0.000903063	0.00108569	0.0176103	0.0152614	0.0309046	0.0281698	0.00156137	0.00167788	0.00144049	0.0012924
Piperidine	Piperidine	8082		86.0964	N.D.	5.04958e-05	N.D.	7.4261e-05	N.D.	N.D.	8.57805e-05	N.D.	N.D.	4.36559e-05	N.D.	N.D.	6.53591e-05	3.81097e-05	4.66856e-05	N.D.	N.D.	N.D.	3.27152e-05	N.D.	N.D.	N.D.	N.D.	N.D.	N.D.	N.D.	N.D.	N.D.	N.D.	N.D.	N.D.	N.D.	N.D.	N.D.	N.D.	5.54145e-05	N.D.	N.D.	N.D.	N.D.
ppGpp_divalent	ppGpp	439450		300.471	N.D.	N.D.	N.D.	N.D.	N.D.	N.D.	N.D.	N.D.	N.D.	N.D.	N.D.	N.D.	N.D.	N.D.	N.D.	N.D.	N.D.	N.D.	N.D.	N.D.	N.D.	N.D.	N.D.	N.D.	N.D.	N.D.	N.D.	N.D.	N.D.	N.D.	N.D.	N.D.	N.D.	7.17505e-06	N.D.	N.D.	N.D.	N.D.	N.D.	N.D.
Pro	Pro	614	HMDB0000162,HMDB0003411	116.071	1.40472	0.499714	0.703058	0.62749	0.545941	0.545673	0.468862	0.608044	1.05532	0.643913	0.663464	0.585338	0.433328	0.277691	0.363425	0.268581	0.483328	0.360436	0.427059	0.430725	0.634215	0.664445	0.751805	0.623203	1.00385	0.709976	0.692023	0.491227	0.776264	0.731613	0.606902	0.629485	0.59702	0.599254	0.853741	0.711335	0.528268	0.474607	0.508881	0.435904
Propionic acid	Propionic acid	1032	HMDB0000237	73.0293	0.000996389	0.000310991	0.000386665	0.000372681	0.000460753	0.000528915	0.00167841	0.000563872	N.D.	0.000371089	0.00032385	0.000344552	0.00371278	0.000879295	0.00319732	0.00106317	0.000397249	0.000352241	0.00038262	0.000339241	0.000326201	0.00027669	0.000383131	0.000260342	0.00162242	0.00102812	0.000698015	0.000820422	0.000282697	0.000251526	0.000300249	0.000285805	0.00420715	0.00371838	0.0067111	0.00527192	0.000292602	0.000306246	0.000329106	0.000285065
Propionyl CoA_divalent	Propanoyl-CoA	92753		410.563	N.D.	N.D.	1.49501e-05	1.30998e-05	N.D.	2.62581e-05	5.27321e-05	2.3386e-05	N.D.	1.28218e-05	2.28688e-05	3.74512e-06	0.00026822	0.000112947	0.000115688	0.000112913	6.03321e-05	5.72487e-05	5.91611e-05	1.63482e-05	N.D.	N.D.	N.D.	N.D.	N.D.	N.D.	6.30556e-06	3.35207e-06	N.D.	N.D.	N.D.	1.86386e-06	1.8635e-05	6.97804e-05	7.72003e-06	7.70033e-06	1.66555e-05	N.D.	N.D.	7.56525e-06
Prostaglandin F2α	Prostaglandin F2a	5280363	HMDB0001139	353.233	0.00093977	0.000461519	0.000614145	0.000596374	0.000111284	0.000116548	0.000127704	0.000147729	0.000532037	0.000464638	0.000556719	0.000355162	0.000376739	0.000176957	0.000263724	0.000147643	0.000166424	0.000181122	0.000217332	0.000246969	0.000385875	0.000364543	0.000310721	0.000301552	0.000223984	7.53857e-05	0.000281078	0.000138826	0.000240224	0.000240524	0.00028558	0.00028457	0.000173984	0.000112906	0.00021384	0.000154385	0.000282083	0.000639335	0.00056906	0.00069072
PRPP	PRPP	7339	HMDB0000280	388.944	0.0002072	9.5132e-05	6.28353e-05	4.40752e-05	0.000790639	0.00026689	5.99016e-05	0.00022508	0.000281902	8.39626e-06	1.67059e-05	1.43102e-05	0.000264588	0.000107836	0.000100623	0.000165074	0.000184011	0.000144753	0.000162059	0.000126864	0.00012054	5.09512e-05	0.000313828	0.000219019	0.000812259	0.000382044	0.000520139	0.000593648	0.000146101	0.000203666	0.000188138	0.000192754	0.000237496	0.000313181	0.000140498	0.000206984	0.000266801	0.000482824	0.000250023	0.000199082
Purine	Purine	1044	HMDB0001366	121.051	3.40137e-05	1.11966e-05	1.93444e-05	2.59609e-05	N.D.	N.D.	8.13278e-06	N.D.	N.D.	N.D.	1.47116e-05	N.D.	N.D.	N.D.	N.D.	N.D.	N.D.	N.D.	N.D.	N.D.	9.03203e-06	1.50826e-05	1.56373e-05	1.10738e-05	N.D.	2.36017e-05	1.27764e-05	N.D.	N.D.	N.D.	N.D.	N.D.	N.D.	N.D.	N.D.	N.D.	N.D.	N.D.	N.D.	7.16333e-06
Purine riboside	Purine riboside	68368		253.093	N.D.	N.D.	1.03257e-05	7.81072e-06	N.D.	N.D.	1.75335e-05	2.03152e-05	N.D.	2.8233e-05	2.14316e-05	N.D.	0.000151854	7.69694e-05	0.000109562	6.32439e-05	N.D.	1.55478e-05	1.67279e-05	2.55448e-05	1.87666e-05	2.88894e-05	1.15974e-05	2.7128e-05	N.D.	N.D.	N.D.	N.D.	N.D.	N.D.	N.D.	N.D.	N.D.	N.D.	N.D.	N.D.	N.D.	N.D.	N.D.	N.D.
Putrescine	Putrescine	1045	HMDB0001414	89.1073	0.0143835	0.0029842	0.00370311	0.00217057	0.0237229	0.0217442	0.0256902	0.015032	0.000409091	0.000454355	0.000318246	0.00025835	0.00486049	0.00187034	0.00184543	0.00176021	0.000948558	0.000695383	0.00071826	0.00065306	0.00291245	0.00337826	0.00198707	0.00231515	0.117809	0.0360618	0.0421134	0.0201109	0.000881784	0.00069604	0.000713548	0.000743964	0.0118032	0.0100716	0.0179824	0.0102848	0.00151274	0.00140075	0.0017037	0.00159621
Pyridoxal	Pyridoxal	1050	HMDB0001545	168.066	N.D.	2.605e-05	0.000109616	N.D.	8.37067e-05	N.D.	4.99821e-05	N.D.	N.D.	N.D.	N.D.	N.D.	0.000146334	N.D.	5.89062e-05	5.74554e-05	N.D.	3.56904e-05	N.D.	4.48935e-05	N.D.	N.D.	N.D.	N.D.	N.D.	N.D.	7.66722e-05	5.2058e-05	N.D.	N.D.	N.D.	N.D.	N.D.	N.D.	N.D.	N.D.	N.D.	N.D.	N.D.	N.D.
Pyridoxamine 5'-phosphate	Pyridoxamine-P	1053	HMDB0001555	249.064	0.00115991	0.000347484	0.000358064	0.000250581	0.000594385	0.000470555	0.000216082	0.00018211	0.00159889	0.000557525	0.000339701	0.000247592	0.000852091	0.000387065	0.000319073	0.000185838	0.000696099	0.000428314	0.000268634	0.000291872	0.000231827	0.000276344	0.000271694	0.000100714	0.00056747	0.000581381	0.0004232	0.000239743	0.000172447	0.000190436	4.55904e-05	0.000112648	0.000287564	0.000235825	0.000213835	0.000215638	0.000280264	0.000240202	0.000187629	0.000109226
Pyrophosphate	Pyrophosphate	1023	HMDB0000250	176.936	0.0429119	0.0161967	0.0218509	0.0204301	0.0204514	0.0197571	0.0182671	0.0189942	0.0327827	0.0192296	0.0191292	0.0184154	0.0167958	0.0138899	0.0149235	0.0130784	0.0170503	0.0174993	0.0169839	0.0156178	0.0153723	0.01499	0.0159157	0.015099	0.0259956	0.0220111	0.020307	0.0187983	0.0177642	0.0189498	0.015807	0.0196267	0.0165709	0.0182994	0.0202643	0.0184704	0.0175237	0.0179173	0.016143	0.0164081
Pyruvic acid	Pyruvic acid	1060	HMDB0000243	87.0085	N.D.	N.D.	N.D.	N.D.	N.D.	N.D.	N.D.	N.D.	N.D.	N.D.	0.000251323	N.D.	N.D.	N.D.	N.D.	N.D.	N.D.	0.000436593	0.00109372	0.000697195	N.D.	N.D.	N.D.	N.D.	N.D.	N.D.	N.D.	N.D.	N.D.	N.D.	N.D.	N.D.	N.D.	N.D.	N.D.	N.D.	N.D.	N.D.	N.D.	N.D.
Quinic acid	Quinic acid	6508	HMDB0003072	191.056	9.08077e-05	2.74103e-05	1.35701e-05	1.59914e-05	0.000419609	0.000385298	0.000436921	0.000321341	0.000157129	8.21638e-05	6.69833e-05	4.92558e-05	2.0834e-05	1.10038e-05	2.339e-05	1.9663e-05	2.69226e-05	1.81875e-05	N.D.	6.18912e-06	7.17012e-06	0.000106342	1.88472e-05	1.56681e-05	0.000535804	0.000388309	0.000333639	0.000342661	7.63141e-05	3.81987e-05	9.22578e-05	7.6795e-05	1.92223e-05	5.26158e-05	2.5601e-05	1.66522e-05	1.52025e-05	2.11656e-05	1.883e-05	N.D.
Quinolinic acid	Quinolinic acid	1066	HMDB0000232	166.014	0.000582954	0.00025341	0.000475281	0.000398272	0.000327419	0.000145038	0.000137042	0.000127621	0.00013236	0.000293726	0.000212911	0.000222494	0.000107937	0.000282738	0.000168531	0.000170251	0.00033621	0.000360849	0.000314529	0.000269172	0.000411554	0.000322401	0.000489828	0.000316277	0.000642128	0.0013469	0.000767915	0.00124017	0.00168641	0.00122475	0.000640321	0.000940981	0.000570286	0.000887203	0.000418976	0.000591705	0.000434817	0.000398697	0.000497618	0.00112262
Riboflavin	Riboflavin	493570	HMDB0000244	377.146	N.D.	9.36598e-05	0.000174692	0.000145716	0.00019647	0.000368804	0.000323884	0.000301345	N.D.	0.000252544	0.000300319	0.000283202	7.90676e-05	5.55206e-05	0.000137746	8.97706e-05	N.D.	N.D.	N.D.	4.90418e-05	0.000471921	0.000492622	0.000586864	0.000692632	0.000645913	0.000468049	0.000636862	0.000597309	0.000343629	0.000276164	0.00016337	0.000497908	0.000126065	0.000151544	0.000209783	0.00027054	0.000143141	0.000180113	0.000231591	0.000317693
Ribose 5-phosphate	R5P	439167	HMDB0001548	229.012	0.00796708	0.000907719	0.000680249	0.000615287	0.00127534	0.00118222	0.00109692	0.000571588	0.00614823	0.00274954	0.00202749	0.00329039	0.00661951	0.00871135	0.00402724	0.00537384	0.0116385	0.0112729	0.0160106	0.0113231	0.000183183	0.000502131	0.000222374	0.000306103	0.00152631	0.000696855	0.000663797	0.000272352	7.42868e-05	0.000102372	0.000418764	0.000149956	0.000256446	0.000614181	0.00112217	0.000293295	0.001061	0.00137389	0.00222541	0.0047449
Ribulose 5-phosphate	Ru5P	439184	HMDB0000618	229.011	0.0119853	0.00554034	0.00488829	0.00509035	0.00633137	0.00510712	0.00558863	0.00454265	0.0167247	0.0108316	0.00873436	0.0085496	0.0170495	0.0221031	0.013597	0.0156092	0.021053	0.0240427	0.0228298	0.0221397	0.00180286	0.0029878	0.00233067	0.00199524	0.00350746	0.00609845	0.004016	0.00432236	0.00170205	0.00258709	0.00230941	0.00284018	0.00461104	0.00510684	0.00323538	0.00353945	0.00726442	0.00698726	0.00694687	0.00597168
S-Adenosylhomocysteine	SAHC	439155	HMDB0000939	385.129	0.0165934	0.00534618	0.0079991	0.00662624	0.00811261	0.00973423	0.00782745	0.00708729	0.0138362	0.00701708	0.00729075	0.00752742	0.00820152	0.00432808	0.00580511	0.00383072	0.00447457	0.00536356	0.00454799	0.00483023	0.00419828	0.00603537	0.00608154	0.00490601	0.0100136	0.00544056	0.00629624	0.00686525	0.00747204	0.0108934	0.00779245	0.00889009	0.00953505	0.00732479	0.0122814	0.0111645	0.00446028	0.0044146	0.00456944	0.00399616
S-Adenosylmethionine	SAM	34755	HMDB0001185	399.144	0.00655763	0.00191945	0.00349454	0.0025135	0.00470806	0.00500773	0.00247351	0.00327048	0.00201125	0.00108456	0.00120177	0.00186481	0.00401161	0.00182108	0.00245478	0.00221448	0.00390903	0.00415675	0.00437155	0.00398415	0.00516437	0.00608878	0.00725425	0.00968798	0.0110888	0.0173767	0.00826209	0.0104567	0.0109989	0.0140176	0.00715406	0.00952316	0.0087565	0.008712	0.0118348	0.011117	0.00841269	0.00717655	0.00788181	0.0067149
S-Carboxymethylcysteine	S-Carboxymethylcysteine	193653		180.032	N.D.	0.000204956	0.000130378	6.35079e-05	0.000321839	0.00039387	0.000112155	0.000248398	N.D.	8.03056e-05	3.36116e-05	3.48584e-05	N.D.	N.D.	N.D.	N.D.	N.D.	2.8241e-05	3.70352e-05	2.34142e-05	0.000818378	0.000249456	0.000416511	0.000230091	0.000550558	0.00108898	0.000750741	5.47942e-05	0.00121864	0.0012013	0.000393103	0.00114587	0.000539401	0.000249048	0.000401451	0.000335695	0.000197505	0.000242797	0.000230353	2.82502e-05
S-Hexylglutathione	S-Hexylglutathione	97536		390.17	N.D.	4.42858e-06	8.8508e-06	6.24867e-06	6.09102e-06	3.15068e-06	3.81776e-06	8.38304e-06	N.D.	2.35069e-06	4.42358e-06	3.39647e-06	8.17936e-06	8.93429e-06	1.03628e-05	9.16279e-06	8.68826e-06	7.236e-06	5.60558e-06	4.80596e-06	3.53385e-06	4.4133e-06	N.D.	N.D.	1.22878e-05	N.D.	4.47066e-06	1.27092e-05	N.D.	6.71786e-06	N.D.	N.D.	5.13427e-06	6.03214e-06	7.94861e-06	7.49267e-06	5.583e-06	4.15513e-06	N.D.	6.38176e-06
S-Lactoylglutathione	S-Lactoylglutathione	440018	HMDB0001066	380.112	N.D.	5.6917e-05	4.00609e-05	9.71732e-05	4.77216e-05	0.000156652	0.000105402	5.39035e-05	N.D.	7.76994e-05	0.000110535	1.7312e-05	9.19014e-05	0.000105524	9.69588e-05	0.00042981	0.000145349	0.00022942	0.00055662	0.000283658	1.35051e-05	3.51927e-05	N.D.	N.D.	N.D.	9.63169e-05	0.000150031	0.000141022	N.D.	1.40601e-05	2.40654e-05	1.64092e-05	0.000112293	2.83438e-05	9.12981e-05	9.63656e-05	6.0979e-05	8.1386e-05	7.96374e-05	0.000277372
S-Methylcysteine	S-Methylcysteine	24417	HMDB0002108	136.043	0.00246546	0.000979022	0.00156831	0.00133401	0.0039012	0.00428781	0.0034938	0.00397834	0.00206147	0.00140052	0.00149983	0.0013275	0.00148387	0.0011722	0.00136718	0.00110715	0.00138982	0.00139793	0.00143074	0.00141047	0.00101139	0.00103623	0.00129939	0.000998038	0.00403677	0.00350718	0.00360197	0.00338196	0.00162787	0.00185982	0.00128431	0.00158511	0.00214071	0.00173925	0.00238538	0.00234676	0.00184295	0.00171472	0.00178813	0.00147288
S-Methylglutathione	S-Methylglutathione	115260		322.107	0.0014948	0.000799381	0.000793876	0.000776494	0.00157239	0.00268402	0.00129118	0.00126672	0.000822064	0.000783389	0.000866475	0.00073767	0.00091996	0.00058215	0.000588215	0.000584811	0.00077682	0.000920536	0.00088563	0.000661846	0.000533147	0.000372246	0.000565	0.000463452	0.000424019	0.000537161	0.000758435	0.00072827	0.000277493	0.000466958	0.000181179	0.000377111	0.000533802	0.000390033	0.000295575	0.000578669	0.00075336	0.000692145	0.00120384	0.000635743
S-Methylmethionine	S-Methylmethionine	145692		164.074	N.D.	1.68135e-05	N.D.	1.52079e-05	N.D.	N.D.	N.D.	1.84245e-05	N.D.	1.72622e-05	1.69094e-05	8.24939e-06	N.D.	N.D.	N.D.	1.7856e-05	9.89855e-06	N.D.	N.D.	1.17372e-05	N.D.	N.D.	N.D.	N.D.	N.D.	N.D.	5.68068e-06	N.D.	N.D.	N.D.	N.D.	N.D.	1.07978e-05	N.D.	N.D.	N.D.	N.D.	N.D.	5.81024e-06	N.D.
S-Nitrosoglutathione	S-Nitrosoglutathione	104858	HMDB0004645	337.081	N.D.	N.D.	N.D.	N.D.	N.D.	N.D.	N.D.	N.D.	N.D.	N.D.	N.D.	N.D.	N.D.	N.D.	N.D.	N.D.	N.D.	N.D.	N.D.	N.D.	N.D.	N.D.	N.D.	N.D.	N.D.	N.D.	N.D.	0.000105852	N.D.	N.D.	N.D.	N.D.	N.D.	N.D.	N.D.	N.D.	N.D.	N.D.	N.D.	N.D.
S-Sulfocysteine	S-Sulfocysteine	115015	HMDB0000731	199.969	5.76637e-05	1.34789e-05	4.29533e-05	1.80045e-05	7.20145e-05	2.31462e-05	5.69642e-05	1.22063e-05	0.000254126	0.000205397	4.4392e-05	7.44032e-05	2.47825e-05	1.1271e-05	1.82683e-05	4.07465e-06	N.D.	N.D.	3.72804e-06	3.91088e-06	7.41239e-05	5.64351e-05	7.14277e-05	1.25193e-05	0.00012491	8.40621e-05	0.000111442	2.16692e-05	6.46022e-05	0.000127436	0.00022236	1.86759e-05	9.03863e-05	0.000238029	0.000383092	0.00011183	N.D.	1.15749e-05	4.98515e-06	3.86276e-06
Saccharopine	Saccharopine	160556	HMDB0000279	277.14	0.000437255	0.000163872	0.000241991	0.000195983	0.000172232	0.000126475	0.000149681	0.000130472	0.000414934	0.000310128	0.000202936	0.000227124	0.000200537	0.00015579	0.000198661	0.000199117	0.000260272	0.000278665	0.000257629	0.000311529	0.000174934	0.000131076	0.000189761	0.000123937	0.000233066	0.000235253	0.000201885	0.000159743	0.00015544	0.000110541	0.000137616	0.000200972	0.000135719	0.000102039	0.000270784	0.000256952	0.000170149	0.000228448	0.000218493	0.000129343
Sarcosine	Sarcosine	1088	HMDB0000271	90.055	0.0104523	0.00345797	0.00566287	0.00541432	0.00338751	0.00361964	0.0033042	0.00328803	N.D.	0.00114421	0.00175515	0.001302	0.00441319	0.00245692	0.00325582	0.00285993	0.00181802	0.00167243	0.00174382	0.00177197	0.00234174	0.00221953	0.00251174	0.00272665	0.00302777	0.00236428	0.00340007	0.00428549	0.0013415	0.00181121	0.00139111	0.00157965	0.00367562	0.00378113	0.00375296	0.00478191	0.00207211	0.00193966	0.00214456	0.00193493
SDMA	SDMA	169148	HMDB0003334	203.15	0.010591	0.00385085	0.00593557	0.00674186	0.0060532	0.00809499	0.00551877	0.00613676	0.00850264	0.00591984	0.00623716	0.00526648	0.00488688	0.00403351	0.00370006	0.00374708	0.00225429	0.00243826	0.00224833	0.00195752	0.00301337	0.00347828	0.00290826	0.00207557	0.00430049	0.00362833	0.00363118	0.00367116	0.00402702	0.00414117	0.00431104	0.00438839	0.00507808	0.0044881	0.00569132	0.00566015	0.00212774	0.00194893	0.00223009	0.00228096
Sebacic acid	Sebacic acid	5192	HMDB0000792	201.113	0.000558156	0.000119863	5.70174e-05	N.D.	0.000208084	0.000131785	7.61359e-05	N.D.	0.000663658	0.000264017	0.000404706	0.000175119	0.000316222	0.000127732	7.06911e-05	N.D.	0.000177779	0.000145981	9.61684e-05	7.89987e-05	5.92827e-05	0.000304155	4.56452e-05	N.D.	0.000389772	0.000191428	0.000155332	0.00010193	0.000103579	7.01319e-05	0.000124408	0.000103507	0.000104472	0.000157053	9.59867e-05	6.6913e-05	0.000200499	0.000446907	0.000142187	0.000106727
Sedoheptulose 7-phosphate	S7P	165007	HMDB0001068	289.033	0.00694221	0.00354143	0.00514233	0.00553769	0.00427214	0.00481553	0.0062367	0.00527158	0.00984084	0.00886201	0.00941289	0.00807179	0.00685786	0.011181	0.0096161	0.0107176	0.0119789	0.017094	0.0182792	0.0175373	0.00428666	0.00297518	0.00458199	0.00497098	0.00666461	0.00724676	0.00655203	0.00837582	0.00338397	0.00527184	0.00479854	0.00948984	0.0034495	0.00421942	0.00346539	0.0057724	0.0086056	0.00887067	0.00958428	0.00934563
Ser	Ser	617	HMDB0000187,HMDB0003406	106.05	0.593125	0.195291	0.282768	0.234026	0.247617	0.228514	0.219184	0.242724	0.522642	0.296339	0.318492	0.267572	0.2434	0.157982	0.174377	0.140144	0.196351	0.161716	0.151311	0.190095	0.166727	0.192713	0.19072	0.142434	0.213367	0.161462	0.139856	0.146019	0.175958	0.191956	0.181582	0.175116	0.126481	0.122639	0.141575	0.127908	0.129259	0.141072	0.132095	0.11399
Serotonin	Serotonin	5202	HMDB0000259	177.102	0.000298709	0.000285884	0.000549596	0.000142484	0.00477268	0.00714386	0.00465125	0.00387039	0.000944738	0.00385162	0.00141375	0.0039257	0.00229105	0.000625856	0.00271963	0.00443623	0.00589334	0.00357926	0.00357697	0.00287513	0.000531258	8.52217e-05	0.000905715	0.00116178	0.000174965	6.81105e-05	0.000594702	0.000449621	8.21704e-05	9.74293e-06	0.000378036	0.00217965	0.0012875	0.0022972	N.D.	0.000227443	0.00792795	0.0142771	0.0078061	0.00797472
Sinapic acid	Sinapic acid	637775		223.061	N.D.	N.D.	N.D.	N.D.	N.D.	N.D.	N.D.	N.D.	N.D.	N.D.	N.D.	N.D.	N.D.	N.D.	N.D.	N.D.	N.D.	N.D.	N.D.	N.D.	N.D.	N.D.	N.D.	N.D.	1.15865e-05	N.D.	N.D.	N.D.	N.D.	N.D.	N.D.	N.D.	N.D.	N.D.	N.D.	N.D.	N.D.	N.D.	N.D.	N.D.
Sorbitol 6-phosphate	Sorbitol 6-phosphate	152306	HMDB0005831	261.038	1.75767e-05	9.30788e-06	1.09416e-05	7.09298e-06	9.31512e-06	1.48095e-05	1.04051e-05	1.25032e-05	2.6802e-05	2.4286e-05	2.80138e-05	2.30669e-05	2.45044e-05	6.4667e-05	3.42245e-05	6.15311e-05	4.1643e-05	6.1742e-05	5.44492e-05	5.41351e-05	8.05638e-06	N.D.	N.D.	3.32893e-06	N.D.	7.5973e-06	2.14085e-05	1.30451e-05	8.06399e-06	1.21424e-05	1.25864e-05	1.27805e-05	2.0486e-05	2.26472e-05	1.2056e-05	1.46666e-05	2.30748e-05	2.35142e-05	1.46193e-05	1.86625e-05
Spermidine	Spermidine	1102	HMDB0001257	146.165	0.014961	0.00755269	0.00838403	0.00565611	0.0050593	0.00882861	0.0115989	0.00640478	0.00512363	0.012577	0.012726	0.00920317	0.00998817	0.0105633	0.00708217	0.00972053	0.00876818	0.0155874	0.0122246	0.0107565	0.0100449	0.0103048	0.0103642	0.00967486	0.0234917	0.0108151	0.0150845	0.0123862	0.00938384	0.00923598	0.0238513	0.0133499	0.0104148	0.00999682	0.013433	0.0102074	0.010754	0.00888491	0.0135513	0.0105139
Spermine	Spermine	1103	HMDB0001256	203.223	0.00192456	0.00250397	0.00214302	0.000976666	0.00163108	0.00361618	0.00524954	0.00235956	0.00153212	0.00448603	0.00546108	0.00376859	0.00166636	0.00248127	0.00132933	0.00193475	0.00264747	0.0081278	0.00654928	0.00478638	0.00197683	0.0031592	0.00228491	0.00207063	0.00211886	0.00191191	0.00265518	0.00407175	0.00270242	0.0037231	0.0096864	0.00445439	0.00211719	0.00256632	0.00255369	0.00195595	0.00282805	0.00251597	0.00534022	0.00263528
Stachydrine	Stachydrine	115244	HMDB0004827	144.102	0.0046353	0.00186949	0.00263515	0.00205117	0.00293292	0.00325587	0.00325153	0.00299502	0.0105436	0.00883421	0.00903514	0.00926021	0.00112268	0.000930031	0.00103347	0.000997891	0.000311986	0.000300365	0.000285479	0.000286617	0.00217845	0.00200007	0.00267804	0.00217882	0.00476735	0.00444049	0.00402046	0.00363317	0.00722802	0.00727994	0.00867626	0.00891008	0.00100738	0.00129901	0.0011602	0.0011335	0.00028544	0.000301397	0.000302323	0.000254415
Suberic acid	Suberic acid	10457	HMDB0000893	173.081	0.000420039	0.000116427	N.D.	4.06395e-05	0.00015579	0.000111161	6.14863e-05	5.58589e-05	0.000586158	0.000482507	0.00111328	0.000444438	0.000238499	9.52e-05	6.95532e-05	7.89097e-05	0.00012393	0.000173368	5.42957e-05	9.13945e-05	3.17467e-05	0.000273904	4.09316e-05	4.73589e-05	0.000393658	0.000170535	0.000183522	0.000153403	9.18848e-05	6.90179e-05	0.00020142	0.000129374	9.04602e-05	0.000109408	9.18659e-05	5.11309e-05	0.00036836	0.00116329	0.000256265	0.000215731
Succinic acid	Succinic acid	1110	HMDB0000254	117.019	0.00579524	0.0020569	0.00183964	0.00141272	0.00917127	0.00849521	0.0148141	0.00949248	0.00319895	0.00162852	0.00155503	0.00244691	0.00444703	0.00291012	0.0045412	0.00727591	0.00523875	0.00506549	0.00491727	0.0044794	0.00335635	0.00387581	0.00288883	0.00574294	0.0258542	0.0218846	0.0238208	0.019549	0.0101884	0.0119435	0.00947286	0.0128135	0.0188494	0.0266431	0.031984	0.0507215	0.017653	0.0167284	0.00945453	0.0177431
Succinyl CoA_divalent Methylmalonyl CoA_divalent	SucCoA Methylmalonyl CoA	92133 123909		432.557	N.D.	N.D.	6.41194e-06	N.D.	N.D.	6.8065e-06	2.86489e-06	1.5964e-05	N.D.	N.D.	N.D.	N.D.	N.D.	2.04671e-05	1.23301e-05	1.66766e-05	N.D.	2.20141e-05	1.70154e-05	7.6992e-06	N.D.	N.D.	N.D.	N.D.	N.D.	N.D.	N.D.	N.D.	N.D.	N.D.	N.D.	N.D.	6.10432e-06	1.48558e-05	N.D.	N.D.	2.09794e-05	1.06266e-05	7.38913e-06	2.34293e-05
Sucrose 6'-phosphate	Sucrose 6'-phosphate	439762		421.075	N.D.	N.D.	N.D.	N.D.	N.D.	N.D.	N.D.	N.D.	N.D.	N.D.	N.D.	N.D.	N.D.	2.57645e-05	1.40926e-05	2.19309e-05	N.D.	N.D.	N.D.	N.D.	N.D.	N.D.	N.D.	N.D.	N.D.	N.D.	N.D.	N.D.	N.D.	N.D.	N.D.	N.D.	N.D.	1.57187e-05	N.D.	1.10215e-05	N.D.	N.D.	N.D.	N.D.
Sulfanilamide_-NH3	Sulfanilamide_-NH3	5333		156.011	5.87797e-05	1.04893e-05	N.D.	8.14158e-06	N.D.	N.D.	N.D.	N.D.	N.D.	N.D.	N.D.	N.D.	1.84548e-05	N.D.	N.D.	1.66753e-05	N.D.	7.43213e-06	7.43174e-06	1.05176e-05	1.2943e-05	N.D.	1.91222e-05	N.D.	3.60882e-05	N.D.	N.D.	1.27773e-05	1.7729e-05	N.D.	N.D.	N.D.	6.5846e-06	N.D.	N.D.	1.25154e-05	7.627e-06	N.D.	1.21908e-05	N.D.
Sulfanilic acid Metanilic acid	Sulfanilic acid Metanilic acid	8479 6926		172.007	7.82942e-05	9.44917e-06	1.17608e-05	8.20327e-06	1.53481e-05	9.67695e-06	8.44757e-06	8.87877e-06	8.75991e-05	8.93706e-06	4.67849e-06	8.30901e-06	1.73279e-05	7.1876e-06	5.84491e-06	7.9354e-06	1.31736e-05	5.80517e-06	6.13141e-06	7.24618e-06	1.17038e-05	8.42213e-06	1.06334e-05	1.01502e-05	3.24628e-05	1.55087e-05	4.98362e-06	5.97333e-06	1.3706e-05	8.35995e-06	7.21954e-06	4.82401e-06	6.28052e-06	6.70286e-06	9.26226e-06	5.59846e-06	9.18507e-06	9.11316e-06	4.95227e-06	5.07295e-06
Sulfotyrosine	Sulfotyrosine	514186		260.023	0.000352936	0.000149561	0.000178509	0.000163952	0.000294579	0.000370396	0.000844965	0.00033455	0.000427071	0.000266692	0.000337117	0.000338155	0.00031835	0.000362042	0.000348629	0.000369698	0.000176745	0.000195039	0.000180835	0.000157654	0.000238322	0.000158766	0.000257282	0.00021458	0.000610933	0.00040501	0.000480358	0.000390205	0.000259725	0.00020099	0.000306533	0.000294499	0.000387179	0.000516553	0.000444041	0.000464294	0.00024731	0.000174555	0.000222761	0.000212943
Synephrine Phenylephrine	Synephrine Phenylephrine	854067 6041	HMDB0004826 HMDB0002182	168.102	N.D.	7.43825e-06	N.D.	N.D.	N.D.	N.D.	N.D.	N.D.	N.D.	N.D.	N.D.	N.D.	N.D.	2.45324e-05	1.96847e-05	2.06171e-05	N.D.	N.D.	N.D.	N.D.	N.D.	N.D.	N.D.	N.D.	N.D.	N.D.	N.D.	N.D.	N.D.	N.D.	N.D.	N.D.	3.60096e-05	3.56476e-05	1.52984e-05	2.73897e-05	N.D.	N.D.	N.D.	N.D.
Taurine	Taurine	1123	HMDB0000251	126.022	1.00228	0.356345	0.539642	0.460548	0.660385	0.437548	0.415292	0.42161	0.840546	0.539483	0.457691	0.483101	0.39923	0.285074	0.347378	0.289054	0.529257	0.454694	0.437856	0.46253	0.911834	0.873171	1.06441	0.914566	2.48076	1.93417	1.2652	1.15111	1.36617	0.916231	0.784137	0.942368	0.822307	0.777677	0.95853	0.855208	0.975206	0.939072	0.678545	0.772023
Taurocholic acid	Taurocholic acid	46783527	HMDB0000036	514.283	0.000100188	1.86658e-05	3.58305e-05	3.67001e-05	N.D.	4.26605e-06	6.34708e-06	N.D.	N.D.	N.D.	N.D.	N.D.	1.82466e-05	1.66258e-05	2.07955e-05	2.54033e-05	N.D.	N.D.	N.D.	N.D.	8.82371e-05	4.63159e-05	6.03432e-05	7.20911e-05	1.64759e-05	N.D.	5.53918e-06	3.10014e-06	N.D.	N.D.	5.64477e-06	N.D.	1.1896e-05	2.472e-05	2.94644e-05	2.39157e-05	2.17924e-05	6.28554e-05	N.D.	1.26259e-05
Taurocyamine	Taurocyamine	68340	HMDB0003584	168.044	N.D.	N.D.	N.D.	N.D.	N.D.	N.D.	N.D.	N.D.	N.D.	N.D.	N.D.	N.D.	N.D.	N.D.	3.95171e-05	N.D.	N.D.	0.000128701	0.000240778	0.000232162	N.D.	N.D.	N.D.	4.37104e-05	N.D.	0.000215317	0.000171298	0.000169461	N.D.	6.92351e-05	N.D.	7.30432e-05	N.D.	8.13021e-05	0.000163707	7.00647e-05	0.000434362	0.000338201	0.000316853	0.000202168
Terephthalic acid	Terephthalic acid	7489	HMDB0002428	165.019	0.00179929	0.000290059	0.000240295	0.000258636	0.000585684	0.000182083	0.000316277	0.000319662	0.00225334	0.000366509	0.000174726	0.000379803	0.000927141	0.000314713	0.000442817	0.000372763	0.000580736	0.000240535	0.000375554	0.000360155	0.000394201	0.000322264	0.000388083	0.000305009	0.00133853	0.000598958	0.000301426	0.000354438	0.00049975	0.000242608	0.000410809	0.000166354	0.000252441	0.000260212	0.000298177	0.000185265	0.000354426	0.000408669	0.000240464	0.00036171
Theobromine	Theobromine	5429	HMDB0002825	181.072	N.D.	0.00013712	0.0002453	0.00020123	0.000791661	0.000703963	0.000683024	0.000716843	N.D.	0.000287419	0.000288587	N.D.	0.000605711	0.000268535	0.000503403	0.000499799	N.D.	N.D.	N.D.	2.88875e-05	0.000219954	N.D.	0.000216302	0.000273009	0.000812719	0.000562054	0.000681246	0.000668165	0.000253708	0.000216309	0.000212892	0.00026088	0.000591323	0.00068719	0.000624719	0.000673214	N.D.	N.D.	6.8285e-05	N.D.
Thiamine	Thiamine	1130	HMDB0000235	265.112	0.000899649	0.000510446	0.000771508	0.000578549	0.00107807	0.00131816	0.000716564	0.000954379	0.000648759	0.000733305	0.000928486	0.000685093	0.000157963	7.00418e-05	7.84363e-05	5.56813e-05	0.000131153	0.000100087	0.000128061	0.000127167	0.000340391	0.000568484	0.000641774	0.000374736	0.000120646	0.000135312	0.000124696	0.000164337	0.000202654	0.000145035	0.000135927	0.000240775	3.67644e-05	4.74198e-05	1.50462e-05	1.45861e-05	0.000100546	7.58327e-05	8.99564e-05	4.8332e-05
Thiamine diphosphate	ThPP	1132	HMDB0001372	423.029	0.000332604	8.81493e-05	7.59906e-05	4.55643e-05	0.000118993	7.99562e-05	5.08098e-05	3.64435e-05	0.00026228	7.37587e-05	5.888e-05	3.65133e-05	0.000115514	5.00532e-05	3.57382e-05	1.45064e-05	8.67483e-05	4.81686e-05	1.47767e-05	1.39737e-05	7.44624e-05	9.98504e-05	4.64292e-05	2.30724e-05	0.000192712	0.00018323	0.000144424	4.44483e-05	6.01801e-05	4.37209e-05	7.59011e-06	2.90506e-05	3.09043e-05	5.921e-05	1.41752e-05	7.75584e-06	5.46993e-05	2.1574e-05	2.67744e-05	1.40128e-05
Thiamine phosphate	TMP	1131	HMDB0002666	345.078	0.000363931	0.000121846	0.000172481	0.000146608	0.000245609	0.000242574	0.000225943	0.000163509	0.000250088	0.000340077	0.000290181	0.000294925	9.13564e-05	5.27411e-05	7.12276e-05	4.20334e-05	0.000109197	9.1064e-05	9.43064e-05	8.65421e-05	0.000217268	0.000156043	0.000322776	0.000200309	0.000126561	0.000102088	0.000134425	0.000127761	4.72145e-05	9.13445e-05	0.000104227	0.000157194	N.D.	4.53125e-05	N.D.	1.37909e-05	8.80833e-05	7.10544e-05	9.44993e-05	3.36548e-05
Thiaproline	Thiaproline	9934		134.027	0.0411916	0.0121783	0.00845877	0.00986662	0.0173885	0.0168876	0.0421396	0.0141076	0.00866949	0.0114437	0.0108897	0.00815784	0.0146105	0.00692289	0.0157788	0.00807211	0.0169225	0.0108682	0.0139879	0.0190936	0.011206	0.0124048	0.0105215	0.011705	0.111661	0.0479065	0.0572948	0.108061	0.018334	0.0157138	0.0175921	0.0508543	0.0115057	0.00844484	0.0168	0.0103911	0.0118402	0.0151405	0.00709983	0.00778572
Thr	Thr	6288	HMDB0000167	120.066	0.532099	0.18803	0.287909	0.240764	0.269833	0.304335	0.267151	0.27518	0.479677	0.314623	0.314477	0.255286	0.233691	0.152032	0.180444	0.146329	0.188644	0.173088	0.162165	0.174756	0.23548	0.265136	0.238086	0.206252	0.302071	0.268041	0.233164	0.247312	0.260532	0.275506	0.262457	0.242771	0.212516	0.212904	0.260806	0.23189	0.14557	0.165992	0.172885	0.146161
Thr-Asp	Thr-Asp	3280446		235.092	0.00619624	0.00275076	0.0033586	0.00223513	0.00389988	0.00360036	0.0028374	0.00265621	0.00544306	0.00313434	0.00212025	0.00137482	0.00613628	0.00322988	0.00291207	0.00244797	0.00452182	0.00334127	0.00294273	0.0029375	0.00224366	0.00220152	0.00261654	0.00157152	0.00899458	0.00852791	0.00529083	0.00391579	0.00450651	0.00382495	0.00206013	0.00215434	0.00494393	0.00404633	0.0038929	0.00414336	0.00597995	0.00565299	0.00362954	0.00312561
threo-3-Hydroxyaspartic acid	threo-3-Hydroxyaspartic acid	443239		150.04	N.D.	N.D.	N.D.	N.D.	N.D.	8.41531e-06	N.D.	N.D.	N.D.	N.D.	N.D.	N.D.	N.D.	N.D.	N.D.	N.D.	N.D.	N.D.	N.D.	N.D.	N.D.	8.53923e-06	N.D.	N.D.	N.D.	N.D.	N.D.	N.D.	N.D.	2.20293e-05	N.D.	2.16248e-05	1.71458e-05	8.19752e-06	2.30497e-05	1.69985e-05	N.D.	N.D.	N.D.	N.D.
Threonic acid	Threonic acid	5460407	HMDB0000943	135.03	0.0141196	0.00454139	0.00448403	0.00328216	0.0146586	0.00606215	0.00591042	0.00463584	0.0146961	0.00808617	0.00317776	0.00537004	0.00350896	0.00245438	0.00219788	0.00200611	0.0025754	0.00286285	0.00284018	0.00259078	0.00688368	0.00672211	0.00454238	0.00387019	0.0134279	0.00964541	0.0184114	0.0053064	0.00532511	0.00882811	0.00967522	0.00529583	0.00420959	0.00639585	0.00663931	0.00439208	0.00361055	0.00477207	0.004774	0.00352079
Thymine	Thymine	1135	HMDB0000262	127.05	0.00161932	0.000555593	0.000924592	0.00107739	0.000671577	0.000405933	0.000755971	0.000738199	N.D.	0.000572961	0.000518691	0.000544785	0.000179329	N.D.	N.D.	7.83328e-05	0.000199034	N.D.	N.D.	0.000156604	0.00142471	0.00169513	0.00127474	0.0012485	0.00173608	0.00196034	0.00108479	0.0013591	0.00138317	0.00172985	0.00125113	0.00122366	0.000851484	0.00068329	0.000996125	0.00110102	0.000405641	0.000342393	0.000504165	0.000519926
Timolol	Timolol	33624		317.165	N.D.	N.D.	N.D.	N.D.	N.D.	N.D.	N.D.	N.D.	N.D.	N.D.	N.D.	N.D.	N.D.	N.D.	N.D.	9.05214e-06	N.D.	N.D.	N.D.	N.D.	N.D.	N.D.	N.D.	N.D.	N.D.	N.D.	N.D.	N.D.	N.D.	N.D.	N.D.	N.D.	7.54216e-06	N.D.	N.D.	4.96345e-06	N.D.	N.D.	N.D.	N.D.
Topiramic acid	Topiramic acid	5284627	HMDB0005034	340.104	N.D.	N.D.	N.D.	N.D.	N.D.	N.D.	1.02146e-05	N.D.	N.D.	N.D.	N.D.	N.D.	N.D.	1.81503e-05	3.6205e-05	2.39655e-05	N.D.	N.D.	N.D.	N.D.	N.D.	N.D.	N.D.	N.D.	N.D.	N.D.	N.D.	N.D.	N.D.	N.D.	N.D.	N.D.	N.D.	N.D.	N.D.	N.D.	3.25015e-05	0.000114025	2.43377e-05	N.D.
trans-Glutaconic acid	trans-Glutaconic acid	5280498	HMDB0000620	131.034	N.D.	N.D.	N.D.	N.D.	N.D.	N.D.	0.00097075	0.000781263	N.D.	N.D.	0.000667786	N.D.	N.D.	0.00125107	0.00144376	0.00111513	N.D.	0.000723388	0.000921412	0.00105048	N.D.	N.D.	0.000962886	N.D.	N.D.	N.D.	0.00136211	0.00115415	0.00132381	0.00166276	0.00100739	0.00147096	0.00453528	0.00483392	0.00537565	0.0062723	0.00112297	0.00114604	0.00117536	0.000973775
Tridecanoic acid	Tridecanoic acid	12530	HMDB0000910	213.186	0.0012962	0.000287587	0.000276647	0.000198267	0.000450549	0.000275724	0.000303877	0.000220702	0.00100846	0.000325697	0.000384441	0.000207586	0.000566997	0.000232952	0.000256417	0.000152985	0.000343059	0.000259354	0.000204561	0.00016237	0.000287965	0.00043107	0.000226991	0.000197761	0.000808553	0.000459355	0.000346538	0.000239192	0.000259445	0.000222502	0.000202713	0.000223283	0.000322278	0.000339372	0.000383501	0.000239273	0.000248272	0.000247843	0.000263281	0.000172963
Triethanolamine	Triethanolamine	7618		150.113	0.00187846	0.000220863	0.000154307	0.000207445	0.00129666	0.0015418	0.00434449	0.00116432	0.00543215	0.0231822	0.00510568	0.0255766	0.00143621	0.000714063	0.00517758	0.00874941	0.00235187	0.000994162	0.00134073	0.00151046	0.000369447	0.000497227	0.000246418	0.000362203	0.0151706	0.00438408	0.00831521	0.00540006	0.000737819	0.000696717	0.021044	0.00622553	0.00881209	0.00193231	0.00512496	0.00374273	0.0113474	0.0162308	0.0047938	0.00566476
Trigonelline	Trigonelline	5570	HMDB0000875	138.055	N.D.	N.D.	N.D.	N.D.	0.000396363	0.000382216	0.000382901	0.000345343	N.D.	N.D.	0.000133273	0.000149089	0.000453871	0.000485316	0.000376985	0.000491988	N.D.	N.D.	N.D.	N.D.	N.D.	0.000210405	N.D.	N.D.	N.D.	0.000514768	0.000457427	0.000456429	N.D.	N.D.	N.D.	0.00014384	0.000560033	0.000921817	0.0010907	0.00101187	N.D.	0.000151726	N.D.	N.D.
Trimethylamine	Trimethylamine	1146	HMDB0000906	60.0809	N.D.	N.D.	0.000215279	0.000145928	N.D.	N.D.	0.000270434	0.000204698	N.D.	N.D.	0.000146609	N.D.	N.D.	N.D.	0.000244244	0.00025122	N.D.	N.D.	0.000180492	0.000198749	N.D.	N.D.	N.D.	N.D.	N.D.	N.D.	N.D.	0.000180593	N.D.	N.D.	N.D.	N.D.	0.00017027	0.000124182	0.000303524	0.000251572	N.D.	N.D.	N.D.	N.D.
Trimethylamine N-oxide	Trimethylamine N-oxide	1145	HMDB0000925	76.0757	N.D.	0.000335137	0.000537073	0.000405644	0.00134387	0.00119514	0.00132481	0.00110744	N.D.	N.D.	N.D.	N.D.	0.00106499	0.000948464	0.00110338	0.000886383	0.000587768	0.000514139	0.000494399	0.000494521	0.000811415	0.000746487	0.000742666	0.0019229	0.00692474	0.00364107	0.00714964	0.00361182	N.D.	N.D.	N.D.	N.D.	0.00167767	0.00146568	0.00193277	0.00191485	0.00227168	0.00410378	0.00187436	0.00120044
Trp	Trp	1148	HMDB0000929	205.097	0.140792	0.067155	0.0868487	0.0816764	0.0650564	0.0820776	0.0790967	0.0725591	0.11187	0.0834651	0.0891543	0.078236	0.0825186	0.0529405	0.0603875	0.0490945	0.0580342	0.0561309	0.0548853	0.0612011	0.0786216	0.082046	0.0913	0.0761362	0.093519	0.0733854	0.0769657	0.0707002	0.0321965	0.060998	0.0627064	0.0568387	0.0690244	0.0695209	0.10665	0.087037	0.0567239	0.0525135	0.0579762	0.0425449
Tyr	Tyr	1153	HMDB0000158	182.081	0.662335	0.246586	0.37358	0.354546	0.279436	0.313943	0.294765	0.299462	0.458257	0.310915	0.331478	0.266336	0.247902	0.199534	0.20465	0.171679	0.19712	0.186357	0.173708	0.196009	0.273729	0.308147	0.308273	0.269095	0.386162	0.267677	0.248513	0.269019	0.256292	0.274133	0.221466	0.242501	0.19114	0.19379	0.264833	0.224449	0.159134	0.14135	0.169917	0.125161
Tyr-Arg_divalent	Tyr-Arg_divalent	123804		169.595	0.00346449	0.00098812	0.000572049	0.000431398	0.000632893	0.000583046	0.000431509	0.000446185	0.00137565	0.000526361	0.000399456	0.00020658	0.00190116	0.00109509	0.000528241	0.000475343	0.00154615	0.000981061	0.000688196	0.000562241	0.000807035	0.00094215	0.000677946	0.000361656	0.00373827	0.00187279	0.00144218	0.000945408	0.00148083	0.000705407	0.000406305	0.000501243	0.000959913	0.00118711	0.000590129	0.000657956	0.000818178	0.000958914	0.000692911	0.000445751
Tyr-Glu	Tyr-Glu			311.124	0.00189324	0.000721818	0.000863295	0.000675663	0.000839538	0.000554833	0.000457069	0.000581831	0.00133421	0.000600921	0.000373272	0.000290748	0.00172261	0.000893143	0.000725813	0.000510262	0.0011907	0.000659698	0.000593474	0.000727533	0.000500274	0.000580996	0.000477297	0.000242699	0.00102289	0.00144517	0.000883437	0.00061279	0.000734995	0.00062686	0.000189125	0.00028407	0.00076811	0.000775542	0.000495012	0.000551887	0.00071476	0.000557706	0.000474641	0.000258143
Tyramine	Tyramine	5610	HMDB0000306	138.091	0.000782003	0.000167113	0.000157968	6.3697e-05	0.000249776	0.000128461	0.000113151	N.D.	0.000497766	0.000246987	7.86324e-05	9.43409e-05	0.000697828	0.00010726	7.9733e-05	7.36887e-05	0.000381359	0.000208135	N.D.	N.D.	0.000152124	0.000239351	0.000134933	N.D.	0.000372669	0.000474213	0.000280986	8.47564e-05	0.000199632	0.000160881	6.64137e-05	6.39033e-05	0.000523398	0.000331652	0.000215372	0.000122795	0.000225	9.37125e-05	0.000134338	N.D.
UDP	UDP	6031	HMDB0000295	402.994	0.000388994	0.000120503	2.1733e-05	1.72851e-05	0.00110476	0.00019735	5.26327e-05	9.34926e-05	0.000314283	8.34948e-05	1.67372e-05	9.23506e-05	0.000278309	0.000184285	3.53287e-05	6.67646e-05	0.000300179	0.00010425	5.27837e-05	4.14417e-05	9.4207e-05	0.000163762	3.40663e-05	9.98496e-05	0.00237619	0.00365491	0.0029184	0.00064993	0.00132518	0.0021806	0.000359036	0.000281208	0.000545429	0.000402619	0.000753805	0.000237841	0.00011286	8.76524e-05	7.49088e-05	0.000105698
UDP-glucose UDP-galactose	UDP-Glc UDP-Gal	8629 23724458	HMDB0000286 HMDB0000302	565.047	0.0173095	0.0120838	0.0103143	0.00969322	0.00827508	0.00583142	0.00412935	0.00761945	0.0153113	0.011688	0.0132288	0.0108883	0.0118955	0.0317741	0.0137695	0.0374111	0.0420735	0.0295695	0.0309134	0.0306455	0.00267403	0.00204835	0.00220712	0.00220165	0.0115702	0.0125202	0.0104975	0.00967276	0.00377933	0.00576757	0.00591063	0.00582867	0.00735845	0.006934	0.00696032	0.00803056	0.0115829	0.00846741	0.0101821	0.00805781
UDP-glucuronic acid	UDP-GlcA	17473	HMDB0000935	579.027	0.0254417	0.0131147	0.0179529	0.0150782	0.0115827	0.00766576	0.00252143	0.00932481	0.010532	0.00747875	0.00856133	0.00721789	0.00539625	0.00966639	0.00685239	0.00994076	0.0144472	0.0151677	0.0161597	0.0155319	0.00595426	0.00582054	0.0077736	0.00760769	0.0107875	0.0140329	0.0151259	0.0140252	0.00876927	0.019086	0.00871947	0.0133118	0.00588215	0.00758824	0.00558155	0.00562091	0.0120235	0.0118175	0.0142538	0.010871
UDP-N-acetylglucosamine UDP-N-acetylgalactosamine	UDP-GlcNAc UDP-N-acetylgalactosamine	445675 23724461	HMDB0000290 HMDB0000304	606.073	0.00659055	0.0044461	0.00394639	0.00349876	0.00634649	0.00474968	0.00294034	0.0034183	0.0111655	0.0101267	0.00777266	0.00705705	0.0256587	0.0388613	0.023166	0.0384901	0.0625909	0.0617392	0.0524504	0.0605678	0.0181205	0.0139336	0.0152353	0.0192578	0.0934728	0.0975536	0.0625347	0.0689218	0.0289015	0.0793343	0.0311842	0.044799	0.0539055	0.0464996	0.0703647	0.0656194	0.0427464	0.0253656	0.03724	0.0331829
UMP	UMP	6030	HMDB0000288	323.028	0.0389114	0.0233574	0.0218568	0.0155381	0.018895	0.0111458	0.00407325	0.007697	0.00543035	0.00293974	0.00172884	0.0022303	0.0218519	0.0481356	0.022112	0.0655162	0.0939075	0.0682218	0.0732299	0.0720452	0.0107106	0.00865357	0.0131108	0.00802818	0.0420149	0.0297676	0.0637194	0.0443785	0.0146602	0.0266015	0.0202949	0.0215043	0.0290007	0.0271035	0.027232	0.0261548	0.0323163	0.0281652	0.0347113	0.019389
Undecanoic acid	Undecanoic acid	8180	HMDB0000947	185.154	0.00151235	0.000261604	0.000208063	0.000157585	0.000406795	0.000292289	0.000292216	0.000194765	0.00121364	0.000296099	0.000271675	0.000218484	0.000933496	0.000192744	0.000403193	0.000173659	0.000373185	0.00022639	0.000129524	0.000135099	0.000267334	0.000317595	0.00019904	0.000108379	0.000822372	0.000447046	0.000368593	0.000219706	0.000268964	0.000214818	0.000236062	0.00017437	0.000348666	0.000372867	0.000341639	0.000238143	0.000186107	0.000175171	0.000208799	0.000122862
Uracil	Uracil	1174	HMDB0000300	113.035	0.304924	0.114727	0.159623	0.152583	0.111068	0.0918551	0.0939475	0.10808	0.167304	0.121984	0.126258	0.109587	0.0916047	0.0717433	0.0779975	0.0574673	0.0835435	0.0849105	0.0764447	0.0835424	0.0979605	0.110547	0.101104	0.0839359	0.152658	0.143655	0.0903373	0.0958402	0.11202	0.115597	0.0886955	0.0940701	0.0823237	0.0768763	0.0835874	0.0797763	0.0780957	0.0676605	0.0665163	0.0741068
Urea	Urea	1176	HMDB0000294	61.0397	0.242635	0.0903614	0.110024	0.102582	0.261838	0.223159	0.207937	0.21923	0.539982	0.299413	0.294713	0.298377	0.234844	0.166277	0.190735	0.184035	0.16861	0.157173	0.168427	0.166311	0.0812027	0.0820288	0.0951349	0.0762181	0.292353	0.230751	0.219342	0.196596	0.285918	0.248545	0.257288	0.270194	0.177749	0.186612	0.181969	0.187536	0.152836	0.162604	0.15216	0.147904
Uric acid	Uric acid	1175	HMDB0000289	167.021	0.0527287	0.0227784	0.0279355	0.0253353	0.0369205	0.0351044	0.0382687	0.0334898	0.0529562	0.0389028	0.0407394	0.041118	0.0160893	0.0178915	0.0182198	0.017899	0.0269307	0.026884	0.034439	0.0261246	0.0152239	0.014031	0.0184059	0.0138683	0.0331938	0.0307525	0.0244377	0.0258916	0.0234518	0.023394	0.0289001	0.0295989	0.0097149	0.0126638	0.0127071	0.0120898	0.0178717	0.0204166	0.0209744	0.0204745
Uridine	Uridine	6029	HMDB0000296	245.077	0.0943087	0.0482225	0.0620553	0.0580769	0.0705459	0.0653729	0.0656229	0.0779192	0.127886	0.100596	0.11473	0.0896962	0.0743571	0.064036	0.0639071	0.0541145	0.0621435	0.0660886	0.0600405	0.0640738	0.0391479	0.0461403	0.0342319	0.029843	0.0332707	0.0237109	0.0245489	0.0258732	0.042928	0.0409393	0.04402	0.0361931	0.0301209	0.0254382	0.0268391	0.0270671	0.023564	0.0199212	0.0236389	0.0266501
Urocanic acid	Urocanic acid	736715	HMDB0000301	139.05	0.00596968	0.00089231	0.000909968	0.00105575	0.000918519	0.00039522	0.000610643	0.0004649	0.00265445	0.00085145	0.00190651	0.000513848	0.00107917	0.000733105	0.000623755	0.000803485	0.00179261	0.000879527	0.00029039	0.000616486	0.00184833	0.00599378	0.00197672	0.0144972	0.00164136	0.00194282	0.000792744	0.000873287	0.00229074	0.000300269	0.000472907	0.000412385	0.00101492	0.00178939	0.00141433	0.00146065	0.000518429	0.00980824	0.00053484	0.000276408
UTP	UTP	6133	HMDB0000285	482.96	9.8507e-05	5.37868e-05	3.07047e-06	N.D.	0.000366301	0.00015449	0.000168227	0.000108795	0.000168621	0.000142465	0.000165568	0.000510525	0.000178403	0.000126612	1.83823e-05	1.59788e-05	0.000152193	3.29753e-05	4.9692e-06	N.D.	6.50166e-05	8.58354e-05	1.13305e-05	4.93047e-05	0.000379016	0.000703462	0.000772453	0.000171429	0.000337756	0.000561384	0.000141265	8.0313e-05	0.000173996	0.000132407	0.000211827	6.84008e-05	2.54995e-05	1.41865e-05	9.98308e-06	3.14486e-05
Val	Val	1182	HMDB0000883	118.086	0.858396	0.311103	0.420654	0.376561	0.390154	0.379186	0.386555	0.413615	0.800095	0.455372	0.503341	0.453221	0.399528	0.250589	0.303468	0.246812	0.339283	0.293239	0.278848	0.330756	0.359431	0.390184	0.440187	0.323419	0.778528	0.501361	0.436928	0.448395	0.424198	0.442082	0.395954	0.394245	0.361842	0.341019	0.502151	0.40451	0.307209	0.275468	0.251165	0.257406
Val-Pro-Pro	Val-Pro-Pro			312.192	N.D.	3.24296e-05	6.65123e-05	3.66962e-05	N.D.	6.5499e-05	2.80785e-05	8.2057e-06	N.D.	2.56203e-05	3.05278e-05	1.19847e-05	0.000119247	0.000186946	0.000206629	0.000134414	0.00016646	9.68649e-05	8.32498e-05	0.000148104	N.D.	2.82641e-05	N.D.	N.D.	N.D.	N.D.	N.D.	N.D.	N.D.	N.D.	6.95973e-05	6.14074e-06	4.16705e-05	N.D.	5.07405e-05	4.19705e-05	N.D.	N.D.	N.D.	1.69443e-05
Vanillylmandelic acid	VMA	1245	HMDB0000291	197.045	N.D.	N.D.	N.D.	N.D.	6.11545e-06	7.41119e-06	6.35536e-06	N.D.	N.D.	7.3015e-06	9.80266e-06	N.D.	N.D.	6.96163e-06	7.54525e-06	7.28538e-06	N.D.	6.33539e-06	N.D.	N.D.	N.D.	N.D.	N.D.	2.35421e-06	N.D.	N.D.	3.87863e-06	N.D.	N.D.	5.3428e-06	5.46936e-06	6.43378e-06	3.58643e-06	1.1705e-05	1.30258e-05	5.06673e-06	N.D.	N.D.	N.D.	N.D.
XA0003	XA0003			124.991	0.000104157	1.50654e-05	2.87349e-05	1.05286e-05	5.63824e-05	2.34965e-05	1.02084e-05	1.3787e-05	0.000281113	2.24783e-05	7.5501e-06	9.53039e-06	3.26416e-05	1.60914e-05	6.50147e-05	6.69971e-06	2.18964e-05	1.65598e-05	9.87975e-06	7.65762e-06	1.17149e-05	5.69744e-05	1.39141e-05	3.67984e-06	9.69058e-05	3.95777e-05	2.4837e-05	1.10956e-05	5.4764e-06	8.62102e-06	7.22745e-06	1.10055e-05	0.000106096	2.50835e-05	7.99518e-06	1.19614e-05	N.D.	2.10064e-05	0.000123719	3.50525e-06
XA0004	XA0004			144.03	6.11753e-05	3.75785e-05	4.88754e-05	3.34135e-05	6.55449e-05	4.93343e-05	4.89723e-05	4.93302e-05	5.84445e-05	3.7313e-05	4.15273e-05	3.54089e-05	3.6902e-05	5.51642e-05	3.33018e-05	2.4288e-05	3.02849e-05	5.41512e-05	3.64995e-05	3.44494e-05	1.89519e-05	8.60693e-05	2.99099e-05	2.08388e-05	3.15363e-05	4.68848e-05	6.5521e-05	5.00335e-05	2.26105e-05	2.46653e-05	4.39579e-05	5.31582e-05	4.77641e-05	6.41765e-05	0.000111347	5.86093e-05	3.50654e-05	4.62349e-05	4.82312e-05	3.47134e-05
XA0012	XA0012			166.018	0.00044057	0.000184777	0.000288005	0.000260012	0.000343137	0.000274137	0.000449634	0.000296659	0.000503967	0.000286912	0.000211526	0.000233793	0.000277314	0.000143872	0.000240523	0.000125048	0.000137521	0.000200821	0.000171952	0.000150255	0.000916627	0.000978536	0.000939603	0.000928013	0.00268419	0.00213523	0.00160927	0.00168904	0.000919535	0.000883544	0.000602193	0.00100833	0.00114265	0.00102701	0.00156087	0.00129006	0.000560562	0.000529657	0.000467092	0.000573099
XA0013	XA0013			172.991	0.00240489	0.000660485	0.000906538	0.00102201	0.00264111	0.00232968	0.00738054	0.00292133	0.00312816	0.00151224	0.00168924	0.00169929	0.00560301	0.00315438	0.0054966	0.00407857	0.000217386	0.000259711	0.000289559	0.000277134	0.000663355	0.000641386	0.000858162	0.000544947	0.00466868	0.00318839	0.00319359	0.00278581	0.00117061	0.00089034	0.00159178	0.00130281	0.00819693	0.00861068	0.00780421	0.00754352	0.000163476	0.000242218	0.000235734	0.0002575
XA0017	XA0017			186.113	0.00590245	0.000911679	0.00053681	0.0003302	0.00158038	0.000786727	0.000430667	0.000282017	0.00553465	0.00113396	0.000495437	0.000360979	0.0021754	0.000615557	0.000336162	0.000199714	0.0017973	0.00132435	0.000504693	0.000369012	0.000438854	0.000928044	0.000317558	8.87376e-05	0.00255359	0.00135045	0.000908594	0.000290279	0.000834853	0.000516272	0.000374885	0.000262381	0.000979191	0.0011421	0.000701919	0.000303767	0.000671895	0.000458473	0.000463542	0.000193762
XA0019	XA0019			191.019	0.0278687	0.00586286	0.00334023	0.0017948	0.0154904	0.00693388	0.00842824	0.00496803	0.00702638	0.0111502	0.00311018	0.00688778	0.00709467	0.00201192	0.00109942	0.00161192	0.00397856	0.00246414	0.00163155	0.00267037	0.00494672	0.00647809	0.00334111	0.00209458	0.0092262	0.0108657	0.0150312	0.00183894	0.004649	0.00746774	0.00541256	0.00308915	0.00244934	0.00593707	0.00508673	0.00167143	0.00113303	0.00574317	0.00233241	0.000951976
XA0035	XA0035			254.981	5.26903e-05	2.97033e-05	4.11293e-05	3.33974e-05	0.000169242	0.000163386	9.89804e-05	0.000131718	N.D.	3.27817e-05	3.76118e-05	5.06368e-05	1.97425e-05	4.42949e-05	3.74178e-05	5.0709e-05	5.67494e-05	5.158e-05	6.42793e-05	5.18065e-05	4.20855e-05	2.14578e-05	3.3316e-05	3.25319e-05	4.86878e-05	2.38231e-05	0.000102537	6.8993e-05	3.16715e-05	2.40914e-05	5.87124e-05	6.88367e-05	1.81841e-05	2.6356e-05	1.63055e-05	2.4861e-05	4.45495e-05	6.58593e-05	7.6836e-05	6.58189e-05
XA0055	XA0055			368.999	0.00315354	0.00200859	0.00199809	0.00169553	0.00559908	0.00628602	0.00415124	0.00366482	0.00967426	0.00728526	0.00498992	0.00577618	0.00633193	0.010649	0.00563936	0.00489068	0.00598527	0.00666858	0.00445352	0.00494113	0.00179903	0.000792903	0.00211742	0.00213798	0.00316013	0.00261768	0.00461971	0.00399872	0.00274016	0.00231811	0.00242993	0.00489842	0.00263448	0.00262915	0.00387605	0.00256752	0.00184629	0.00423698	0.00418409	0.00375944
XA0065	XA0065			445.053	0.0239444	0.0129271	0.0150528	0.01202	0.0119444	0.0115645	0.0109065	0.00991427	0.022421	0.0150597	0.0153923	0.0157778	0.0169077	0.0116627	0.013505	0.0122295	0.017296	0.0203055	0.0189059	0.0181737	0.00718463	0.00742366	0.00931309	0.00919977	0.0162564	0.0211802	0.0187727	0.0152434	0.0113199	0.0160519	0.0069	0.0138738	0.0145228	0.0144833	0.017864	0.0162782	0.0200387	0.0159286	0.0161175	0.0182605
XA0080	XA0080	440992		243.027	0.00995013	0.00410073	0.00646139	0.00503541	0.00520567	0.00548908	0.00258482	0.00417364	0.00300277	0.00307096	0.00327837	0.00302894	0.000282995	0.000232392	0.000318985	0.000200223	0.00176392	0.00132127	0.00153264	0.0011693	0.00299213	0.00283027	0.00292712	0.0025286	0.00534337	0.00318429	0.00480611	0.00572565	0.00271603	0.00383684	0.00267988	0.00355085	0.00131863	0.00136137	0.00196988	0.00169153	0.00279227	0.00267863	0.00308696	0.00261432
XA0081	XA0081	3825		253.086	N.D.	N.D.	N.D.	N.D.	N.D.	N.D.	N.D.	N.D.	N.D.	N.D.	N.D.	N.D.	N.D.	N.D.	N.D.	N.D.	N.D.	N.D.	N.D.	N.D.	N.D.	N.D.	N.D.	N.D.	2.22917e-05	N.D.	N.D.	N.D.	N.D.	N.D.	N.D.	N.D.	N.D.	N.D.	N.D.	N.D.	N.D.	N.D.	N.D.	N.D.
Xanthine	Xanthine	1188	HMDB0000292	153.041	0.37037	0.134684	0.198329	0.173451	0.123251	0.145833	0.14341	0.135971	0.214056	0.17601	0.194693	0.165299	0.0947182	0.063229	0.0713587	0.0585956	0.0858398	0.0853108	0.0919891	0.0988085	0.15008	0.180466	0.165778	0.131659	0.153544	0.186826	0.121717	0.13645	0.197869	0.15282	0.123696	0.160212	0.0796192	0.0796283	0.0935064	0.0803003	0.0873095	0.0850624	0.0975271	0.0957192
Xanthopterin	Xanthopterin	8397		180.052	N.D.	N.D.	N.D.	N.D.	N.D.	9.47675e-06	N.D.	2.29178e-05	N.D.	N.D.	N.D.	N.D.	N.D.	1.21246e-05	N.D.	N.D.	N.D.	N.D.	1.86248e-05	3.58967e-05	N.D.	N.D.	N.D.	N.D.	N.D.	N.D.	N.D.	3.40148e-05	N.D.	N.D.	N.D.	N.D.	2.99038e-05	N.D.	N.D.	2.76779e-05	3.3801e-05	2.00904e-05	6.6189e-05	4.37454e-05
Xanthosine	Xanthosine	64959	HMDB0000299	283.068	0.00180438	0.000733005	0.00126613	0.00111071	0.00153599	0.00170765	0.00239407	0.00220929	0.00345784	0.00166193	0.00163788	0.0016957	0.000754334	0.000212155	0.000589186	0.00019802	0.000313318	0.00038807	0.000418546	0.000362934	0.00390901	0.00295166	0.00342595	0.0038514	0.00466895	0.00292795	0.00203662	0.0023484	0.00232414	0.00189864	0.00122302	0.00213215	0.000843352	0.000888601	0.00154528	0.001046	0.00078455	0.00120299	0.00135258	0.00168176
XC0001	XC0001			72.0808	N.D.	N.D.	N.D.	N.D.	0.00051409	0.000620077	0.00201721	0.000843388	N.D.	N.D.	N.D.	N.D.	N.D.	N.D.	0.000446546	N.D.	N.D.	N.D.	N.D.	N.D.	N.D.	N.D.	N.D.	N.D.	N.D.	0.000926807	0.0013112	0.000869705	N.D.	N.D.	N.D.	N.D.	0.000437078	0.000622415	0.000706818	0.000575701	N.D.	N.D.	N.D.	N.D.
XC0016	XC0016			129.066	0.0457702	0.0150905	0.0207176	0.0160958	0.0917332	0.136475	0.0895902	0.0926903	0.133776	0.0839493	0.0827666	0.0775839	0.136946	0.094168	0.0893751	0.11214	0.0375054	0.0338749	0.0356147	0.0398796	0.0121291	0.0129965	0.0145284	0.0115919	0.190602	0.213493	0.115031	0.164883	0.0922071	0.116189	0.0974013	0.104441	0.097412	0.121633	0.126348	0.12603	0.0298049	0.0312337	0.03099	0.0240133
XC0017	XC0017			130.098	0.000212729	1.23986e-05	1.48838e-05	7.40305e-06	3.16834e-05	N.D.	1.26916e-05	N.D.	0.000285068	3.79625e-05	1.15472e-05	1.02273e-05	5.13494e-05	1.71958e-05	8.19634e-06	8.30739e-06	1.65219e-05	1.8523e-05	1.10372e-05	N.D.	1.35207e-05	6.45937e-05	N.D.	N.D.	N.D.	2.08244e-05	3.12335e-05	2.52772e-05	1.53756e-05	2.0656e-05	1.66717e-05	N.D.	N.D.	N.D.	N.D.	N.D.	N.D.	1.12819e-05	N.D.	N.D.
XC0040	XC0040			174.087	0.000185043	1.62911e-05	N.D.	5.99984e-05	N.D.	2.54092e-05	3.10567e-05	2.97456e-05	0.000191653	0.000111008	8.40119e-05	8.46925e-05	4.5413e-05	5.73193e-05	4.30308e-05	3.89333e-05	2.86212e-05	2.05389e-05	3.65675e-05	2.01016e-05	N.D.	1.2373e-05	N.D.	N.D.	N.D.	N.D.	N.D.	1.82432e-05	N.D.	N.D.	7.07603e-05	N.D.	N.D.	N.D.	N.D.	N.D.	1.61991e-05	6.61818e-06	1.65923e-05	8.87938e-05
XC0061 Propionylcarnitine	XC0061 Propionylcarnitine	0 188824	HMDB0000824	218.139	0.00938985	0.00352632	0.00416013	0.00446664	0.00703735	0.0125277	0.0128818	0.00732985	0.0149387	0.0116837	0.0113568	0.00901181	0.0546378	0.0210001	0.0340168	0.0314792	0.0223322	0.0179508	0.0269535	0.0260384	0.00603339	0.00571427	0.00590481	0.00397472	0.0414774	0.0183284	0.0192378	0.0263239	0.00426349	0.00374858	0.00511276	0.00758904	0.0306742	0.0272904	0.0291853	0.0294025	0.0100978	0.011382	0.0120986	0.0104151
XC0065	XC0065			221.092	0.00186595	0.000647496	0.00116021	0.00101296	0.000745243	0.000688215	0.000669908	0.000591821	0.000479173	0.000727131	0.000669552	0.000676403	0.000397489	0.000404864	0.000355876	0.000308106	0.000507015	0.000439226	0.000494958	0.000466529	0.00200166	0.00145372	0.00165325	0.00125155	0.00427164	0.00339125	0.00205461	0.00264057	0.00692948	0.00477036	0.0030094	0.00386217	0.00149067	0.00189334	0.00151928	0.00199009	0.00177318	0.00143205	0.00167195	0.00168418
XC0071	XC0071			234.181	0.00085842	0.000229171	0.000177683	0.000115235	0.000205694	0.000258937	0.000200955	0.000117069	0.000770166	0.000333214	0.000297448	0.000239446	0.000465988	0.00036945	0.000189954	0.00028147	0.000499422	0.00040206	0.000333382	0.000275911	0.000174708	0.000204897	0.000190994	0.000136759	0.000290178	0.000159131	0.000140377	7.75353e-05	0.000122565	0.000115911	0.000181017	0.000161723	0.000371412	0.000358881	0.000294248	0.000212078	0.000277222	0.000180652	0.000314743	0.000205949
XC0089 Nicotinamide riboside	XC0089 Nicotinamide riboside	0 439924	HMDB0000855	255.098	0.000279297	0.000138132	0.000167695	0.000146708	0.000688556	0.00084023	0.000866793	0.000508845	0.00102275	0.000573936	0.000374532	0.000495984	0.000665765	0.000284001	0.000433721	0.000273623	0.000578735	0.000604089	0.000629814	0.000614746	0.000698846	0.000720554	0.000747579	0.00064174	0.00120142	0.00157654	0.00138279	0.000861658	0.00194945	0.00163949	0.000878608	0.00197132	0.000403507	0.000517839	0.000683048	0.000537317	0.0007149	0.000685493	0.000578524	0.000433025
XC0120	XC0120			298.053	0.00180182	0.000248577	0.00151703	0.000651729	0.000849744	0.000529364	0.000345009	0.000755437	0.00339548	0.0023742	0.000948163	0.000949419	0.00060194	4.09154e-05	0.000143644	1.21826e-05	2.33851e-05	1.46633e-05	1.86443e-05	3.34273e-05	0.00214337	0.00186234	0.0028991	0.00121193	0.00292998	0.0020611	0.00156232	0.00135065	0.0114184	0.0141591	0.00227927	0.00356831	0.00204694	0.00361591	0.00416821	0.00335639	0.000323678	0.000632723	0.00029097	0.000132101
XC0126	XC0126			310.113	0.000126435	0.000100321	9.10261e-05	0.000100647	9.78525e-05	0.000122506	0.000106375	8.84179e-05	7.79688e-05	0.000159805	0.000156718	0.000140474	0.000172503	0.000272831	0.000170907	0.000403992	0.00018173	0.000156598	0.000184559	0.000212595	8.83452e-05	0.00010998	8.66418e-05	8.25976e-05	0.000209777	0.000286483	0.000213764	0.000281263	0.000225686	0.000275345	0.000289421	0.000237654	0.000194547	0.000155802	0.000170438	0.000218989	0.000204356	0.000167631	0.000185353	0.000182326
XC0132	XC0132			325.161	0.0104928	0.00519378	0.00647642	0.00562025	0.0074431	0.00756781	0.00662772	0.00604375	0.0162478	0.010153	0.00881614	0.00918001	0.00675717	0.00411612	0.0049285	0.00406147	0.00811069	0.0111824	0.0075803	0.00772879	0.0108759	0.00637178	0.00791856	0.0055989	0.0144048	0.00680088	0.00768081	0.00579569	0.00579369	0.00603688	0.00500344	0.00844358	0.00685564	0.00616017	0.00773763	0.00774831	0.00925864	0.0142677	0.00891572	0.0078887
XC0137	XC0137			350.102	0.000346151	3.19442e-05	5.33126e-05	6.23735e-05	2.5262e-05	0.000104963	0.000134896	0.000102058	N.D.	4.62622e-05	4.48711e-05	0.000110984	0.000197239	0.000107554	8.54436e-05	9.72182e-05	0.000272194	0.000150693	8.26456e-05	8.21529e-05	N.D.	2.62366e-05	N.D.	2.41976e-05	0.00010899	N.D.	0.00022969	0.000103135	N.D.	N.D.	4.90534e-05	2.225e-05	1.31354e-05	6.01574e-05	6.40034e-06	7.87748e-06	0.000290623	0.000157448	8.78507e-05	0.000134374
XC0145	XC0145	15331		161.092	0.00773832	0.00378642	0.00533935	0.00414643	0.00517307	0.00418445	0.00497115	0.00426656	0.00684903	0.00330011	0.00319273	0.00194912	0.01044	0.00628651	0.00509551	0.00468021	0.00600394	0.00381554	0.00348622	0.0036967	0.00322884	0.00283205	0.00361804	0.00174675	0.00819972	0.00985415	0.00642446	0.00546044	0.0041207	0.00409442	0.00143476	0.00307997	0.00627864	0.00600592	0.00316716	0.00409692	0.00677061	0.00630484	0.00381131	0.00416581
XC0146	XC0146	203443		163.108	0.000120165	4.87484e-05	7.3964e-05	6.43292e-05	9.30235e-05	9.14144e-05	4.67266e-05	6.0494e-05	0.000119446	0.000107993	8.15321e-05	0.000110316	3.87308e-05	4.95159e-05	5.39347e-05	3.16492e-05	6.62544e-05	0.000139827	6.96336e-05	5.81364e-05	0.000154372	5.87324e-05	7.69868e-05	5.0986e-05	0.00014985	7.05471e-05	7.8822e-05	6.98624e-05	5.0321e-05	7.92982e-05	5.14703e-05	6.82445e-05	6.79412e-05	7.60394e-05	7.88936e-05	8.02157e-05	8.3609e-05	0.000135066	8.45069e-05	7.23578e-05
XC0147	XC0147	4173		172.072	0.000647694	0.000202011	0.000447828	0.000137722	0.000202395	0.000102851	0.000116189	9.90271e-05	N.D.	0.000181403	0.000157633	0.000127828	5.7501e-05	2.65095e-05	5.7885e-05	4.22574e-05	0.000111867	0.000112729	9.40401e-05	7.22753e-05	0.000101804	7.5754e-05	0.000127694	0.000270594	0.00016685	0.000294454	0.000246167	0.000156523	0.000216994	0.000275234	0.000273322	0.000521764	3.09233e-05	5.91479e-05	0.00012596	5.58041e-05	6.89752e-05	0.000155817	0.000107046	0.000108163
XC0150	XC0150	11082		217.064	0.00546271	0.000935179	0.00115003	0.00101114	0.00157572	0.000838668	0.000995874	0.00114102	0.00803973	0.00143773	0.00090771	0.0012765	0.0024445	0.000871096	0.00115674	0.00125486	0.00203509	0.000845042	0.00121161	0.00124292	0.00124043	0.00106839	0.00140089	0.00103705	0.00344053	0.001684	0.00112232	0.00131876	0.00179976	0.00111869	0.00109503	0.000920495	0.000886373	0.00102527	0.00115613	0.000917352	0.000990786	0.00133023	0.000916712	0.000937093
XMP	XMP	73323	HMDB0001554	363.034	0.00382401	0.00181495	0.00348105	0.00238382	0.00481786	0.00440942	0.00273684	0.00441491	0.00182575	0.000808227	0.000726173	0.00107796	0.000782854	0.0007411	0.000811044	0.000606344	0.000372173	0.000512035	0.000337678	0.000341721	0.00325733	0.00215781	0.00377488	0.00321104	0.00339631	0.0024852	0.0053234	0.00426397	0.00352513	0.00503364	0.00264821	0.00405414	0.00252165	0.00238676	0.00325616	0.00192586	0.00153464	0.00231604	0.00277386	0.00217665
β-Ala	b-Ala	239	HMDB0000056	90.055	0.00806397	0.00429067	0.00714223	0.00579162	0.00884286	0.00716135	0.00676547	0.00761954	0.00481694	0.00314442	0.00404722	0.00385805	0.00422957	0.00315786	0.00354429	0.00370876	0.00505581	0.00465438	0.00540374	0.00517477	0.0105323	0.0102311	0.0108005	0.0107202	0.0303415	0.0235205	0.0257957	0.0218914	0.0129475	0.0142343	0.0116221	0.0133605	0.0151221	0.013307	0.0160711	0.0170872	0.0122996	0.0118241	0.0113458	0.0104474
β-Ala-Lys	b-Ala-Lys	440638		218.15	N.D.	N.D.	N.D.	N.D.	2.41245e-05	3.21752e-05	4.03926e-05	2.29254e-05	N.D.	N.D.	N.D.	N.D.	1.30345e-05	N.D.	6.85269e-06	1.28244e-05	N.D.	N.D.	N.D.	N.D.	9.34429e-06	N.D.	N.D.	N.D.	5.22738e-05	3.24704e-05	3.16485e-05	3.4815e-05	N.D.	N.D.	N.D.	N.D.	2.39107e-05	2.024e-05	3.96629e-05	3.84214e-05	N.D.	N.D.	N.D.	N.D.
β-Carboline	b-Carboline	64961	HMDB0012897	169.076	N.D.	N.D.	N.D.	N.D.	N.D.	N.D.	N.D.	N.D.	N.D.	N.D.	N.D.	N.D.	N.D.	N.D.	N.D.	1.45198e-05	5.82438e-05	N.D.	N.D.	N.D.	N.D.	N.D.	N.D.	N.D.	N.D.	N.D.	N.D.	N.D.	N.D.	N.D.	N.D.	N.D.	N.D.	N.D.	N.D.	N.D.	N.D.	N.D.	N.D.	N.D.
β-Hydroxyisovaleric acid	b-Hydroxyisovaleric acid	69362	HMDB0000754	117.055	0.000744487	0.000212736	0.000168403	0.000158435	0.000388995	0.000211964	0.000407874	0.000166038	0.000675396	0.000294538	0.000233099	0.000256246	0.000418196	0.000183458	0.000256684	0.000170156	0.000256373	0.000172578	0.000101591	8.61596e-05	0.000193075	0.000228253	0.000176138	0.000155237	0.000541388	0.000337634	0.00036143	0.000291915	0.000312986	0.000257728	0.000300521	0.000343677	0.00027301	0.000364159	0.000402906	0.000279832	0.000117481	0.000135636	0.000145475	9.85393e-05
β-Hydroxypyruvic acid	b-Hydroxypyruvic acid	964	HMDB0001352	103.003	N.D.	7.05246e-06	7.40208e-06	8.52567e-06	7.58706e-06	3.81806e-06	N.D.	N.D.	N.D.	N.D.	4.44787e-06	N.D.	N.D.	6.30352e-06	4.93512e-06	3.66554e-06	7.50319e-06	5.30226e-06	9.43743e-06	N.D.	3.83224e-06	8.27744e-06	4.01887e-06	N.D.	N.D.	N.D.	1.41622e-05	9.99036e-06	N.D.	9.10527e-06	6.04882e-06	6.17616e-06	N.D.	N.D.	N.D.	N.D.	2.89895e-06	N.D.	1.17093e-05	5.56195e-06
β-Leucine	b-Leucine	2761558	HMDB0003640	132.102	N.D.	8.60505e-05	N.D.	6.12037e-05	N.D.	N.D.	8.4483e-05	9.64552e-05	N.D.	8.84818e-05	0.00010267	N.D.	N.D.	6.77501e-05	0.000113842	6.09006e-05	0.0001822	0.000106836	0.000137552	0.000161294	0.000128775	N.D.	N.D.	N.D.	N.D.	7.33863e-05	8.07813e-05	0.000134052	N.D.	9.11967e-05	6.94869e-05	7.35923e-05	5.50818e-05	9.18772e-05	0.00012058	5.7608e-05	8.45393e-05	N.D.	0.000156443	N.D.
γ-Butyrobetaine	Actinine	134	HMDB0001161	146.118	0.0195297	0.00658858	0.0097935	0.00807605	0.0120902	0.0117767	0.0145241	0.011931	0.0195568	0.0131736	0.0133239	0.0135602	0.0423614	0.0269575	0.0276042	0.0337692	0.0357829	0.0287675	0.0389418	0.0380072	0.0107729	0.00963073	0.0125043	0.0121683	0.047556	0.0361976	0.0385009	0.0356059	0.0137121	0.0144248	0.0105311	0.0165395	0.0429391	0.0474656	0.0741219	0.0691954	0.0322993	0.0305357	0.0267315	0.0211891
γ-Glu-Ala	g-Glu-Ala	440103	HMDB0006248	219.098	0.00704212	0.00303824	0.0047098	0.00292367	0.00604961	0.00412094	0.00368989	0.00262903	0.0039563	0.00314344	0.00281046	0.00188424	0.00265117	0.00122884	0.00124801	0.00056971	0.0012582	0.00103889	0.000770302	0.000601037	0.0037559	0.00240529	0.0035721	0.00241911	0.00332576	0.00119576	0.00175181	0.00167566	0.00133093	0.00149743	0.00125556	0.000880159	0.00215981	0.00209046	0.00158368	0.00185543	0.00126704	0.00171158	0.00197532	0.0019752
γ-Glu-Arg_divalent	g-Glu-Arg	20719180		152.585	0.00235758	0.00092989	0.00252206	0.00210958	0.00165508	0.00212168	0.00243857	0.00279758	0.00313293	0.0028343	0.00475121	0.00346968	0.000555767	0.000555887	0.000777504	0.000586972	0.000589134	0.000556119	0.000680199	0.000665505	0.00208268	0.00152959	0.00201906	0.00326551	0.0018662	0.000971016	0.00149544	0.00237479	0.0033972	0.0031557	0.00413415	0.00316243	0.0010907	0.000995452	0.00146863	0.00183071	0.000927156	0.00112703	0.00135153	0.00175058
γ-Glu-Asn	g-Glu-Asn	131801686	HMDB0029144	262.104	0.000598162	0.000298708	0.000554103	0.000455958	0.000338953	0.000445908	0.000349981	0.000387742	0.000428256	0.000434675	0.000472519	0.000405192	0.000202286	0.000169582	0.000185479	0.000119579	0.000160754	0.000129833	0.000144802	0.000125932	0.000305387	0.000314663	0.000343482	0.000282404	0.000307002	0.000234489	0.000212335	0.000356275	0.000748268	0.000692345	0.000606014	0.000557521	0.000421014	0.000299976	0.000494988	0.000356418	0.000169389	0.000209106	0.000232064	0.000209776
γ-Glu-Asp	g-Glu-Asp	161197	HMDB0030419	263.088	0.000127352	5.35608e-05	0.000111541	0.000130774	0.000120271	0.000115708	9.2315e-05	9.92568e-05	N.D.	N.D.	0.000132836	0.000116374	7.55544e-05	4.13559e-05	6.83051e-05	4.78704e-05	N.D.	6.97669e-05	5.3133e-05	6.14867e-05	4.99533e-05	8.47796e-05	6.30634e-05	0.0001015	6.2148e-05	0.000166905	8.07677e-05	0.000176185	0.00018367	0.000171043	0.000127383	0.000150992	0.000135843	0.000163261	0.000198555	0.000208732	6.25148e-05	6.45306e-05	7.76876e-05	9.74178e-05
γ-Glu-Citrulline	g-Glu-Citrulline			305.146	0.000210525	5.93579e-05	0.000104948	8.13745e-05	0.000201765	0.00012329	0.00030037	9.54448e-05	0.00033149	0.000207387	0.000171297	0.00012503	0.000153102	2.59431e-05	8.11102e-05	2.41471e-05	N.D.	5.64591e-06	1.18362e-05	N.D.	0.000289415	0.00014019	0.00020548	0.000176703	0.000482978	0.000121891	0.00016955	0.000176166	0.000101521	6.77508e-05	8.99269e-05	4.95783e-05	7.05491e-05	0.000138817	9.59692e-05	8.24359e-05	2.23125e-05	3.77007e-05	3.23073e-05	4.63513e-05
γ-Glu-Cys	g-Glu-Cys	123938	HMDB0001049	251.07	N.D.	0.00110814	0.000112919	0.00232869	0.000275627	0.00326231	0.00182503	0.00319839	N.D.	N.D.	0.00156725	0.000234801	0.00164066	0.00134877	0.00169044	0.00191509	0.00130591	0.00123703	0.00120136	0.000845448	0.00173993	0.000363391	0.00192771	0.0047912	0.00166689	0.000931701	6.3263e-05	0.00434138	0.000128224	N.D.	0.000447945	0.000371916	0.00289114	0.00032245	0.000255786	0.00383378	0.00449969	0.0031716	0.00386906	0.00549163
γ-Glu-Gln	g-Glu-Gln	150914	HMDB0011738	276.119	0.025786	0.00788316	0.0172625	0.0129405	0.0352331	0.0196404	0.0212166	0.0192694	0.0244479	0.0178117	0.0153277	0.0136887	0.0201014	0.0120522	0.0123271	0.00846356	0.00600645	0.0054374	0.00456866	0.00411273	0.00854983	0.00631846	0.0110504	0.00754383	0.0102523	0.00453161	0.00777096	0.00704302	0.00648979	0.00689084	0.00488868	0.00458023	0.00967374	0.012737	0.00772754	0.00904367	0.00657971	0.00866407	0.00891516	0.0097766
γ-Glu-Glu	g-Glu-Glu	92865	HMDB0011737	277.103	0.0126412	0.00502308	0.0106935	0.00717371	0.0151152	0.00909994	0.0131927	0.0131332	0.00888672	0.0123876	0.0126436	0.0146704	0.00476842	0.00266094	0.00351669	0.00230797	0.00192248	0.00149179	0.00100141	0.000880418	0.0133227	0.00764798	0.0128766	0.00587552	0.0153266	0.00738981	0.012005	0.0106382	0.0239336	0.00795065	0.0193973	0.0059483	0.0076896	0.00791284	0.0072957	0.00636405	0.00322327	0.00512237	0.00431154	0.00397189
γ-Glu-Gly	g-Glu-Gly	165527	HMDB0011667	205.082	0.00773082	0.00337387	0.00650223	0.00533078	0.00485168	0.00515319	0.00491005	0.00507163	0.00557853	0.00428748	0.0046503	0.00431144	0.00211819	0.00174401	0.00203075	0.00145208	0.00197947	0.00169882	0.00171855	0.0016086	0.00398639	0.00375407	0.00398493	0.00479955	0.00388813	0.00266979	0.00282081	0.00450969	0.0103188	0.00744762	0.00901142	0.00687667	0.00486238	0.00368192	0.00573902	0.00502192	0.00220219	0.00308644	0.00393776	0.00399535
γ-Glu-His	g-Glu-His	7017195	HMDB0029151	285.12	0.000535002	0.000200351	0.000342114	0.000324464	0.000260375	0.000382189	0.00029074	0.000371155	0.000673359	0.000339914	0.00049169	0.000380003	0.000172001	0.000148931	0.000174864	0.000156193	0.000158209	0.000134141	0.000147615	0.000140109	0.000273888	0.000331457	0.000284907	0.000393834	0.000448913	0.000283799	0.000300879	0.000450195	0.000845615	0.000974224	0.000738348	0.000674668	0.000431732	0.000307699	0.000571402	0.000488398	0.000187146	0.000273926	0.000268027	0.000256413
γ-Glu-Ile γ-Glu-Leu	g-Glu-Ile g-Glu-Leu	22885096 151023	HMDB0011170 HMDB0011171	261.145	0.0020749	0.000950023	0.00170816	0.0014645	0.0010338	0.00156788	0.00176887	0.00156772	0.00254657	0.00210973	0.00244648	0.00205102	0.000958748	0.00074438	0.000998738	0.000805247	0.00077003	0.000708719	0.000701175	0.000799914	0.00135559	0.00163064	0.00146929	0.0017762	0.00254704	0.00177212	0.00173416	0.00270709	0.00611532	0.00521738	0.00544424	0.00485346	0.0024361	0.00202757	0.00379744	0.00322574	0.000676447	0.000736646	0.00103194	0.000992793
γ-Glu-Lys_divalent	g-Glu-Lys	65254		138.581	0.00197861	0.000811262	0.00194609	0.00148021	0.00146348	0.00172076	0.00220922	0.00192891	0.00306187	0.00279761	0.00337663	0.00308022	0.000655326	0.000468178	0.000801925	0.000622321	0.000513002	0.000474084	0.000605823	0.000520563	0.0016001	0.0014218	0.00168781	0.00201216	0.00269882	0.00131216	0.00169597	0.00235025	0.00417677	0.00273926	0.00537554	0.00345775	0.00169779	0.00153682	0.00239043	0.00255887	0.000706763	0.000815471	0.00102839	0.00109252
γ-Glu-Met	g-Glu-Met	7009567	HMDB0034367	279.101	0.0011776	0.000442217	0.000568648	0.000898009	0.000569805	0.000856489	0.000625062	0.000790013	0.000978492	0.000659792	0.00107763	0.000688319	0.000435417	0.000413517	0.00052896	0.000250608	0.000229429	0.000216256	0.000164778	0.000123975	0.000643491	0.000603689	0.000785815	0.000830303	0.000584733	0.000177075	0.000274149	0.000461604	0.000467146	0.000517175	0.000608697	0.000366848	0.000458606	0.000495012	0.000264924	0.000549096	0.000275303	0.000242581	0.00042968	0.000451565
γ-Glu-Ornitine	g-Glu-Ornitine	189156	HMDB0002248	262.14	0.000495262	0.0002551	0.000298353	0.000244514	0.000368258	0.000314485	0.000244609	0.000189343	0.000559879	0.0004171	0.000383508	0.000364187	0.00045185	0.000339338	0.000329755	0.000317654	0.000408061	0.000367013	0.000374127	0.000423127	0.000200523	0.000199206	0.00027602	0.000259873	0.000316282	0.000283541	0.000366577	0.00028298	0.00034593	0.000359601	0.000286881	0.000390984	0.000301027	0.000211072	0.000355141	0.00033799	0.000268429	0.000300891	0.000291882	0.000253685
γ-Glu-Phe	g-Glu-Phe	111299	HMDB0000594	295.129	0.000641252	0.000236637	0.000545012	0.000467887	0.000313598	0.000427499	0.000537784	0.000550654	0.000750797	0.000518867	0.000678343	0.000608754	0.000239655	0.000229109	0.000241376	0.000234611	0.000191587	0.000153468	0.000187976	0.0001936	0.000501305	0.0005132	0.000510669	0.000574832	0.000853821	0.000549086	0.000595403	0.000888871	0.00169072	0.00139514	0.00173533	0.00122483	0.000872246	0.000707772	0.00135831	0.00117632	0.000204216	0.000238315	0.000312993	0.00030114
γ-Glu-Ser	g-Glu-Ser	22844748	HMDB0029158	235.093	0.00270267	0.00130843	0.00236794	0.00193382	0.00191808	0.00231473	0.00250835	0.00241899	0.00396791	0.00330026	0.00365473	0.00285079	0.001206	0.000901319	0.00120802	0.000839633	0.000976783	0.000846593	0.00080509	0.00083889	0.00126647	0.00140184	0.00154121	0.001652	0.0014512	0.00103496	0.00108808	0.00145409	0.00365079	0.00252535	0.00277407	0.00231696	0.00121893	0.00103428	0.00139212	0.00134976	0.000789796	0.00106795	0.00106634	0.00101134
γ-Glu-Taurine	g-Glu-Taurine	68759	HMDB0004195	253.05	0.00157258	0.00082823	0.00131151	0.0011083	0.000932976	0.000945959	0.0008673	0.000844462	0.00170471	0.0011522	0.00122396	0.00102027	0.000511789	0.00060898	0.000653521	0.000480525	0.000735943	0.000773534	0.000755685	0.000694371	0.00143449	0.00232747	0.00166279	0.0028208	0.00381674	0.00441607	0.002362	0.0040628	0.00732867	0.0059144	0.00516676	0.00726934	0.00342423	0.00280357	0.00534279	0.00390566	0.00169997	0.00149618	0.00198633	0.00212375
γ-Glu-Thr	g-Glu-Thr	53861142	HMDB0029159	249.108	0.000401781	0.000233169	0.000396818	0.000347548	0.000461364	0.000519354	0.000602239	0.000576083	0.000787942	0.000658713	0.000750739	0.000705265	0.000289441	0.000245802	0.000274161	0.00022017	0.000167138	0.000145444	0.000196324	0.00018251	0.000440196	0.000402588	0.000435869	0.000491983	0.000630519	0.00040347	0.000421255	0.000605711	0.00165206	0.00138062	0.00152522	0.00122011	0.000530755	0.000466861	0.000773554	0.0006619	0.000190114	0.000292709	0.000319188	0.000275812
γ-Glu-Trp	g-Glu-Trp	3038501	HMDB0029160	334.14	3.84803e-05	3.5513e-05	8.66956e-05	7.70142e-05	4.43299e-05	6.28699e-05	9.96163e-05	8.02964e-05	6.10509e-05	0.000120283	0.000164393	0.000151053	5.86913e-05	3.79996e-05	4.48179e-05	4.60842e-05	3.13435e-05	2.32212e-05	2.93827e-05	3.57386e-05	0.000154973	0.000107991	0.000120128	0.000160221	7.5387e-05	6.76253e-05	0.000102082	0.000140544	0.000406522	0.000285525	0.000351125	0.000279719	0.000138259	0.000102028	0.000211097	0.000196419	4.53042e-05	6.88236e-05	6.78804e-05	0.00010166
γ-Glu-Tyr	g-Glu-Tyr	94340	HMDB0011741	311.124	0.000553727	0.000185073	0.000455417	0.000216502	0.000254626	0.000207487	0.000342874	0.00029232	0.000676628	0.000463512	0.000531809	0.000444544	0.000146305	9.54133e-05	0.000109844	7.03948e-05	4.18366e-05	3.41109e-05	7.25894e-05	3.54375e-05	0.000445528	0.000428092	0.000400441	0.000498145	0.000578619	0.0003131	0.000378449	0.000428241	0.00140378	0.00112566	0.00111219	0.00098019	0.000332124	0.000317739	0.000645583	0.000341966	3.80981e-05	0.000101881	0.000101879	0.000109571
γ-Glu-Val	g-Glu-Val	7015683	HMDB0011172	247.129	0.000871676	0.000415085	0.000673511	0.000581946	0.000538949	0.000793772	0.000778836	0.000708836	0.00101482	0.000762162	0.000927571	0.000758918	0.000500044	0.000392304	0.000438941	0.000384325	0.00037096	0.000311616	0.000330102	0.000293912	0.000512749	0.000546258	0.000499374	0.000692066	0.00121563	0.000736021	0.000793655	0.00106494	0.00185908	0.00191326	0.00191601	0.00169739	0.00105814	0.000831248	0.00167744	0.00130502	0.000350864	0.000346686	0.00048691	0.000419183
γ-Glu-Val-Gly	g-Glu-Val-Gly			304.151	0.000119106	9.4589e-05	0.000273065	0.000167937	0.000102216	0.000142532	0.000157967	0.000116648	N.D.	0.000155802	0.000252467	0.000181253	0.000168703	0.000172613	0.000181939	0.000125362	8.28388e-05	0.000115009	0.000163888	0.000186689	0.000102686	6.59958e-05	0.000135578	0.000209057	9.74445e-05	9.20529e-05	0.000113539	0.000216866	0.000158703	0.000276953	0.000105754	0.000228631	0.000155163	0.000138916	0.000169411	0.000232914	0.000149985	0.000168298	0.000165519	0.00027178
γ-Glutamyl-S-Allylcysteine	g-Glutamyl-S-Allylcysteine	11193907	HMDB0031874	291.102	N.D.	N.D.	5.41839e-05	N.D.	5.40603e-05	5.97671e-06	2.58551e-05	N.D.	N.D.	N.D.	N.D.	N.D.	N.D.	N.D.	N.D.	N.D.	N.D.	N.D.	N.D.	N.D.	N.D.	N.D.	N.D.	1.1885e-05	N.D.	2.72462e-05	6.16371e-05	1.16093e-05	N.D.	1.34381e-05	1.39299e-05	3.21524e-05	N.D.	2.99877e-05	1.94652e-05	N.D.	N.D.	3.01996e-05	N.D.	N.D.
